# Supplementary material for: Synthesis and structures of homoleptic germylenes and stannylenes with sulfonimidamide ligands
Source: Royal Society of Chemistry journal article supplement (doi:10.1039/d3dt01072d), 2023-01-01
Supplement: d3dt01072d1.pdf [file d3dt01072d1.pdf]

## *Synthesis and Structures of Homoleptic Germylenes and Stannylenes with Sulfonimidamide Ligands*

Nicolas Lentz,<sup>a</sup> Alexandre Sodreau,<sup>a</sup> Alejandra Acuña,<sup>a,b</sup> Sonia Mallet-Ladeira,<sup>c</sup> Eddy Maerten,<sup>a</sup> Jean-Marc Sotiropoulos,<sup>d</sup> René S. Rojas,<sup>b</sup> David Madec\*<sup>a</sup>

<sup>a</sup> Université de Toulouse, UPS, LHFA (Laboratoire Hétérochimie Fondamentale et Appliquée), UMR/CNRS 5069, 118 route de Narbonne, 31062 Toulouse Cedex 09, France.

<sup>b</sup> Laboratorio de Química Inorgánica, Facultad de Química y Farmacia, Pontificia, Universidad Católica de Chile, Santiago 6094411, Chile.

<sup>c</sup> Institut de Chimie de Toulouse (ICT, UAR 2599), 118 route de Narbonne, 31062 Toulouse Cedex 09, France.

<sup>d</sup> Université de Pau et des Pays l'Adour et CNRS, IPREM UMR 5254, Hélioparc 2 avenue du Président Angot 64053 Pau, France.

### Table of contents

|                                                                                                                    |                                    |
|--------------------------------------------------------------------------------------------------------------------|------------------------------------|
| General Procedures.....                                                                                            | 2                                  |
| Study on the formation of heteroleptic sulfonimidamide metallylene .....                                           | <b>Erreur ! Signet non défini.</b> |
| <sup>1</sup> H NMR spectrum of compound 1 (C <sub>6</sub> D <sub>6</sub> , 300 MHz).....                           | 3                                  |
| <sup>13</sup> C NMR spectrum of compound 1 (C <sub>6</sub> D <sub>6</sub> , 75 MHz).....                           | 4                                  |
| <sup>1</sup> H NMR spectrum of compound 2 (C <sub>6</sub> D <sub>6</sub> , 300 MHz).....                           | 5                                  |
| <sup>13</sup> C NMR spectrum of compound 2 (C <sub>6</sub> D <sub>6</sub> , 75 MHz).....                           | 6                                  |
| <sup>1</sup> H NMR spectrum of compound 3 (C <sub>6</sub> D <sub>6</sub> , 300 MHz).....                           | 7                                  |
| <sup>13</sup> C NMR spectrum of compound 3 (C <sub>6</sub> D <sub>6</sub> , 75 MHz).....                           | 8                                  |
| <sup>1</sup> H NMR spectrum of compound 4 (C <sub>6</sub> D <sub>6</sub> , 300 MHz).....                           | 9                                  |
| <sup>13</sup> C NMR spectrum of compound 4 (C <sub>6</sub> D <sub>6</sub> , 75 MHz).....                           | 10                                 |
| <sup>1</sup> H NMR spectrum of compound 5 (C <sub>6</sub> D <sub>6</sub> , 300 MHz).....                           | 11                                 |
| <sup>13</sup> C NMR spectrum of compound 5 (C <sub>6</sub> D <sub>6</sub> , 75 MHz).....                           | 12                                 |
| <sup>119</sup> Sn NMR spectrum of compound 5 (C <sub>6</sub> D <sub>6</sub> , 186 MHz).....                        | 13                                 |
| <sup>1</sup> H NMR spectrum of compound 6 (C <sub>6</sub> D <sub>6</sub> , 300 MHz).....                           | 14                                 |
| <sup>13</sup> C NMR spectrum of compound 6 (C <sub>6</sub> D <sub>6</sub> , 75 MHz).....                           | 15                                 |
| <sup>119</sup> Sn NMR spectrum of compound 6 (C <sub>6</sub> D <sub>6</sub> , 186 MHz).....                        | 16                                 |
| VT <sup>1</sup> H NMR spectrum of compound 4 from +20 °C to +70 °C (C <sub>6</sub> D <sub>6</sub> , 300 MHz) ..... | 17                                 |
| Crystal data and structure refinement of compound 1.....                                                           | 18                                 |
| Crystal data and structure refinement of compound 2.....                                                           | 28                                 |
| Crystal data and structure refinement of compound 3.....                                                           | 39                                 |
| Crystal data and structure refinement of compound 4.....                                                           | 46                                 |
| Crystal data and structure refinement of compound 5.....                                                           | 59                                 |
| Crystal data and structure refinement of compound 6.....                                                           | 59                                 |
| Calculations .....                                                                                                 | 85                                 |

## General Procedures.

All manipulations with air-sensitive materials were performed in a dry and oxygen-free atmosphere of argon by using standard Schlenk-line and glovebox techniques. Solvents were purified with the MBraun SBS-800 purification system. NMR spectra were recorded with the following spectrometers:  $^1\text{H}$ , Bruker Avance II 300 (300.18 MHz) and Avance III HD 500 MHz;  $^{13}\text{C}$ , Bruker Avance II 300 (75.48 MHz) and Avance III HD 500 MHz;  $^{31}\text{P}$ , Bruker Avance II 300 (75.48 MHz) and Avance III HD 500 MHz at 298 K;  $^{119}\text{Sn}$ , Bruker Avance III HD 500 MHz. Mass spectra were measured on a direct chemical ionization (DCI- $\text{CH}_4$ ) methods, and recorded on a GCT Premier Waters mass spectrometer

Melting points were measured with a capillary electrothermal apparatus. IR spectra were measured on a Varian 640-IR FT-IR spectrometer. All reagents were obtained from commercial suppliers unless otherwise statement.

Single-crystal X-ray data were collected at low temperature (193(2)K) on a Bruker-AXS APEX II Quazar diffractometer equipped with a 30W air-cooled microfocus source (**4** and **6**) or on a Bruker-AXS PHOTON100 D8 VENTURE diffractometer (**1**, **2**, **3** and **5**), using  $\text{MoK}_\alpha$  radiation ( $\lambda = 0.71037 \text{ \AA}$ ). The structures were solved by direct method (SHELXS-97)<sup>1</sup> and by intrinsic phasing method (SHELXT)<sup>2</sup> and refined by full-matrix least-squares method on F2.<sup>3</sup> All the hydrogen atoms were refined isotropically at calculated positions using a riding model and all non-H atoms were refined with anisotropic displacement parameters.

For **3**, some solvent molecules were highly disordered and difficult to model correctly. Therefore the SQUEEZE function of PLATON<sup>4</sup> was used to eliminate the contribution of the electron density of those solvent molecules from the intensity data.

<sup>1</sup> G. M. Sheldrick *Acta Cryst. Sect. A*, **2008**, A64, 112-122

<sup>2</sup> G. M. Sheldrick *Acta Cryst. Sect. A*, **2015**, A71, 3–8.

<sup>3</sup> G. M. Sheldrick *Acta Cryst. Sect. C*, **2015**, C71, 3–8.

<sup>4</sup> P. v.d. Sluis and A. L. Spek, *Acta Cryst., Sect. A*, **1990**, 46, 194-201.

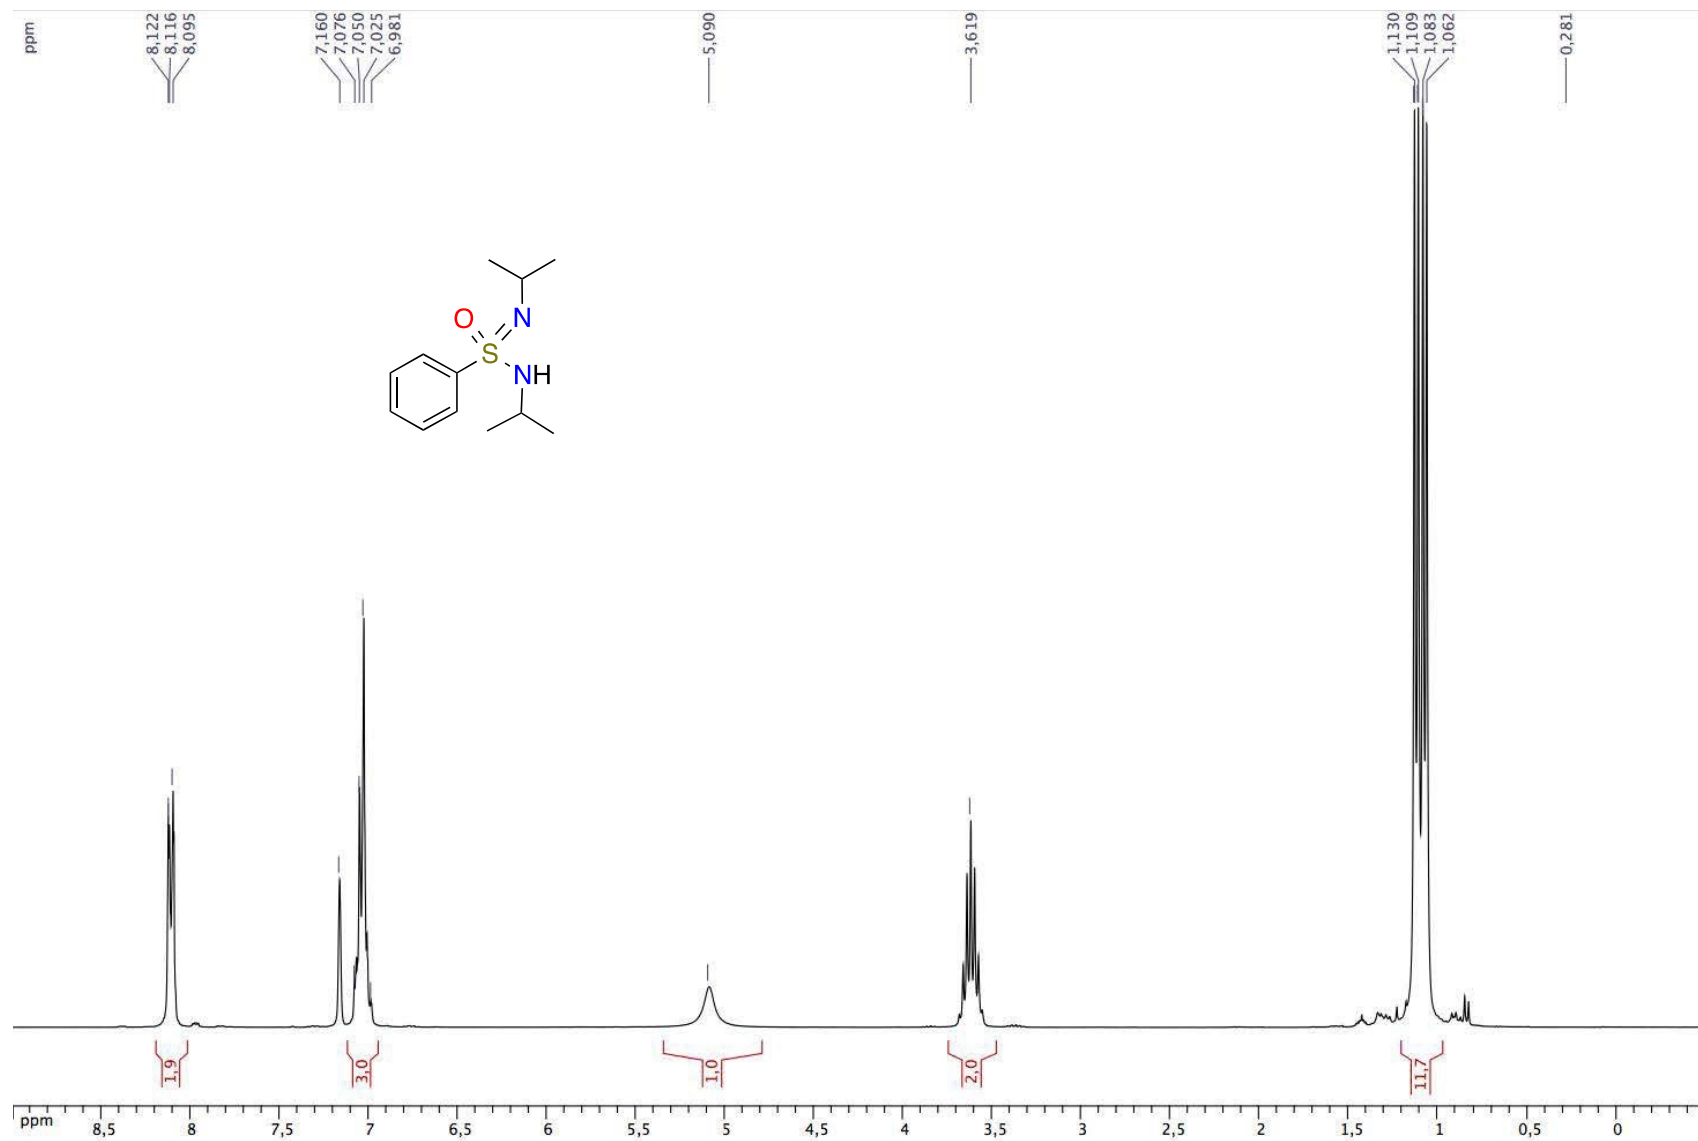

<sup>1</sup>H NMR spectrum of compound 1 (C<sub>6</sub>D<sub>6</sub>, 300 MHz)

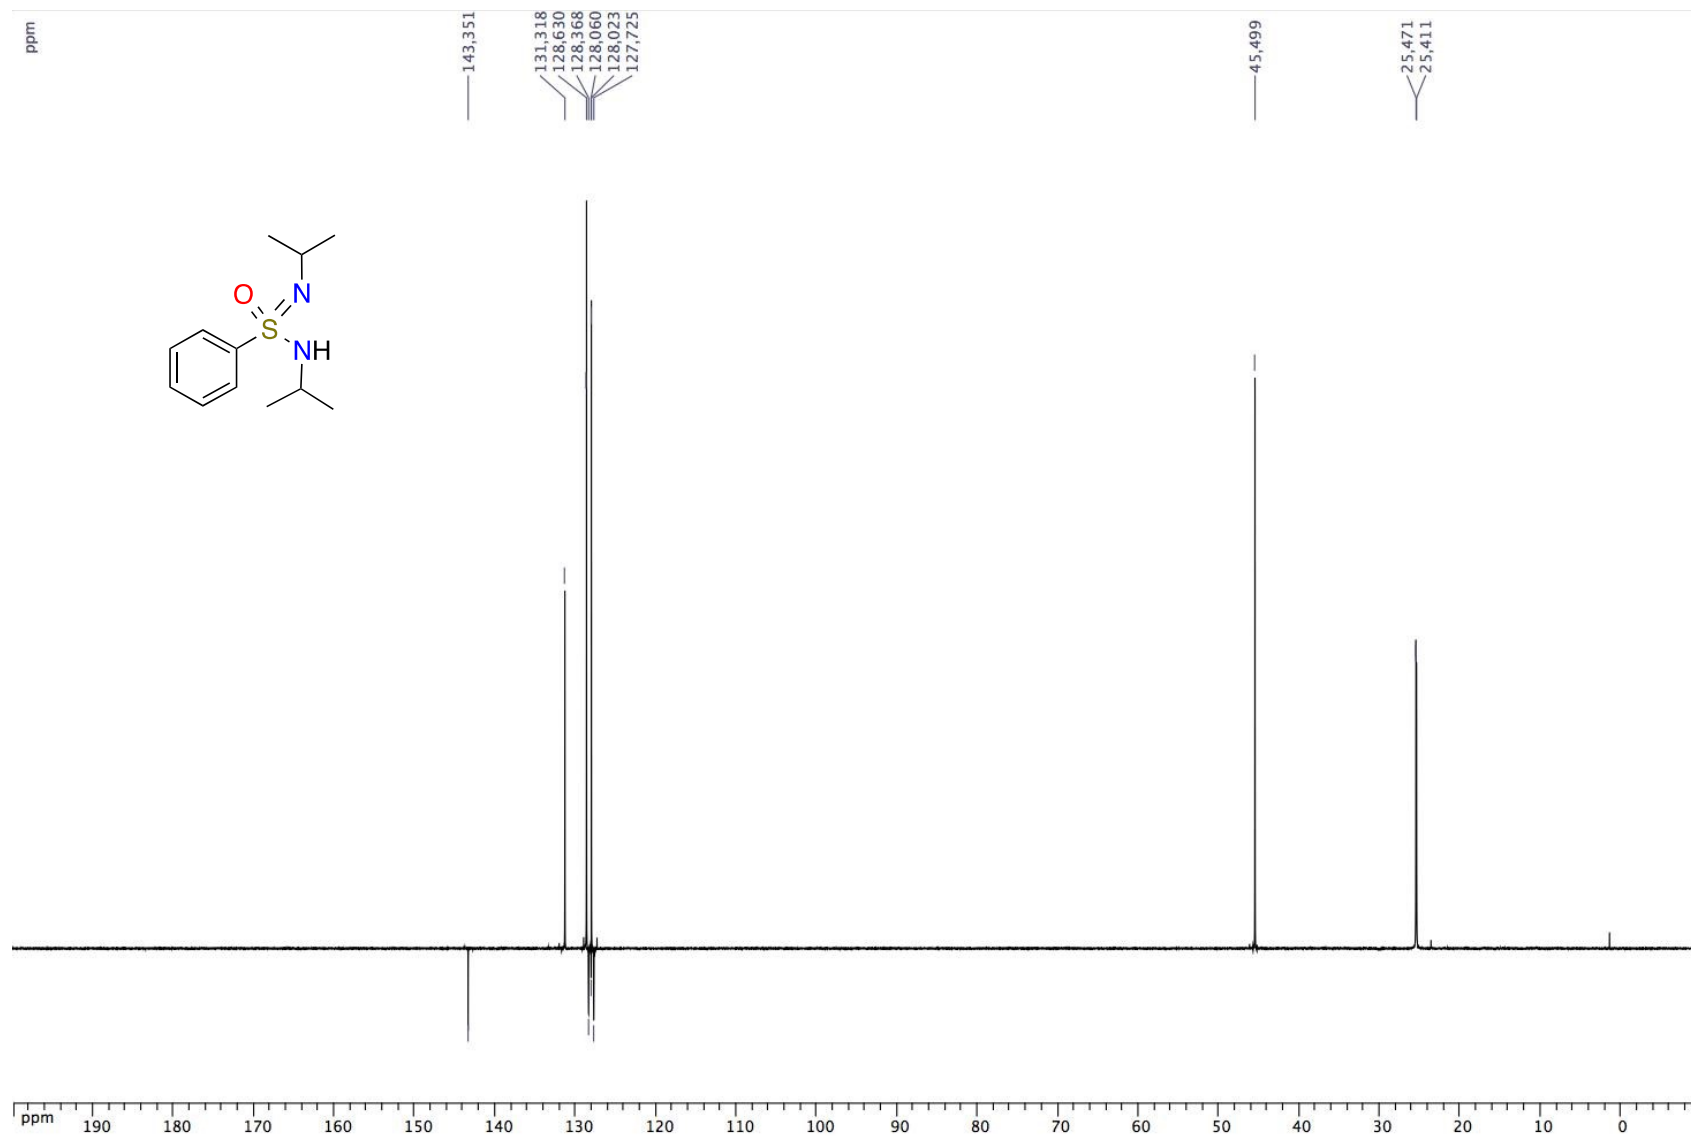

$^{13}\text{C}$  NMR spectrum of compound **1** ( $\text{C}_6\text{D}_6$ , 75 MHz)

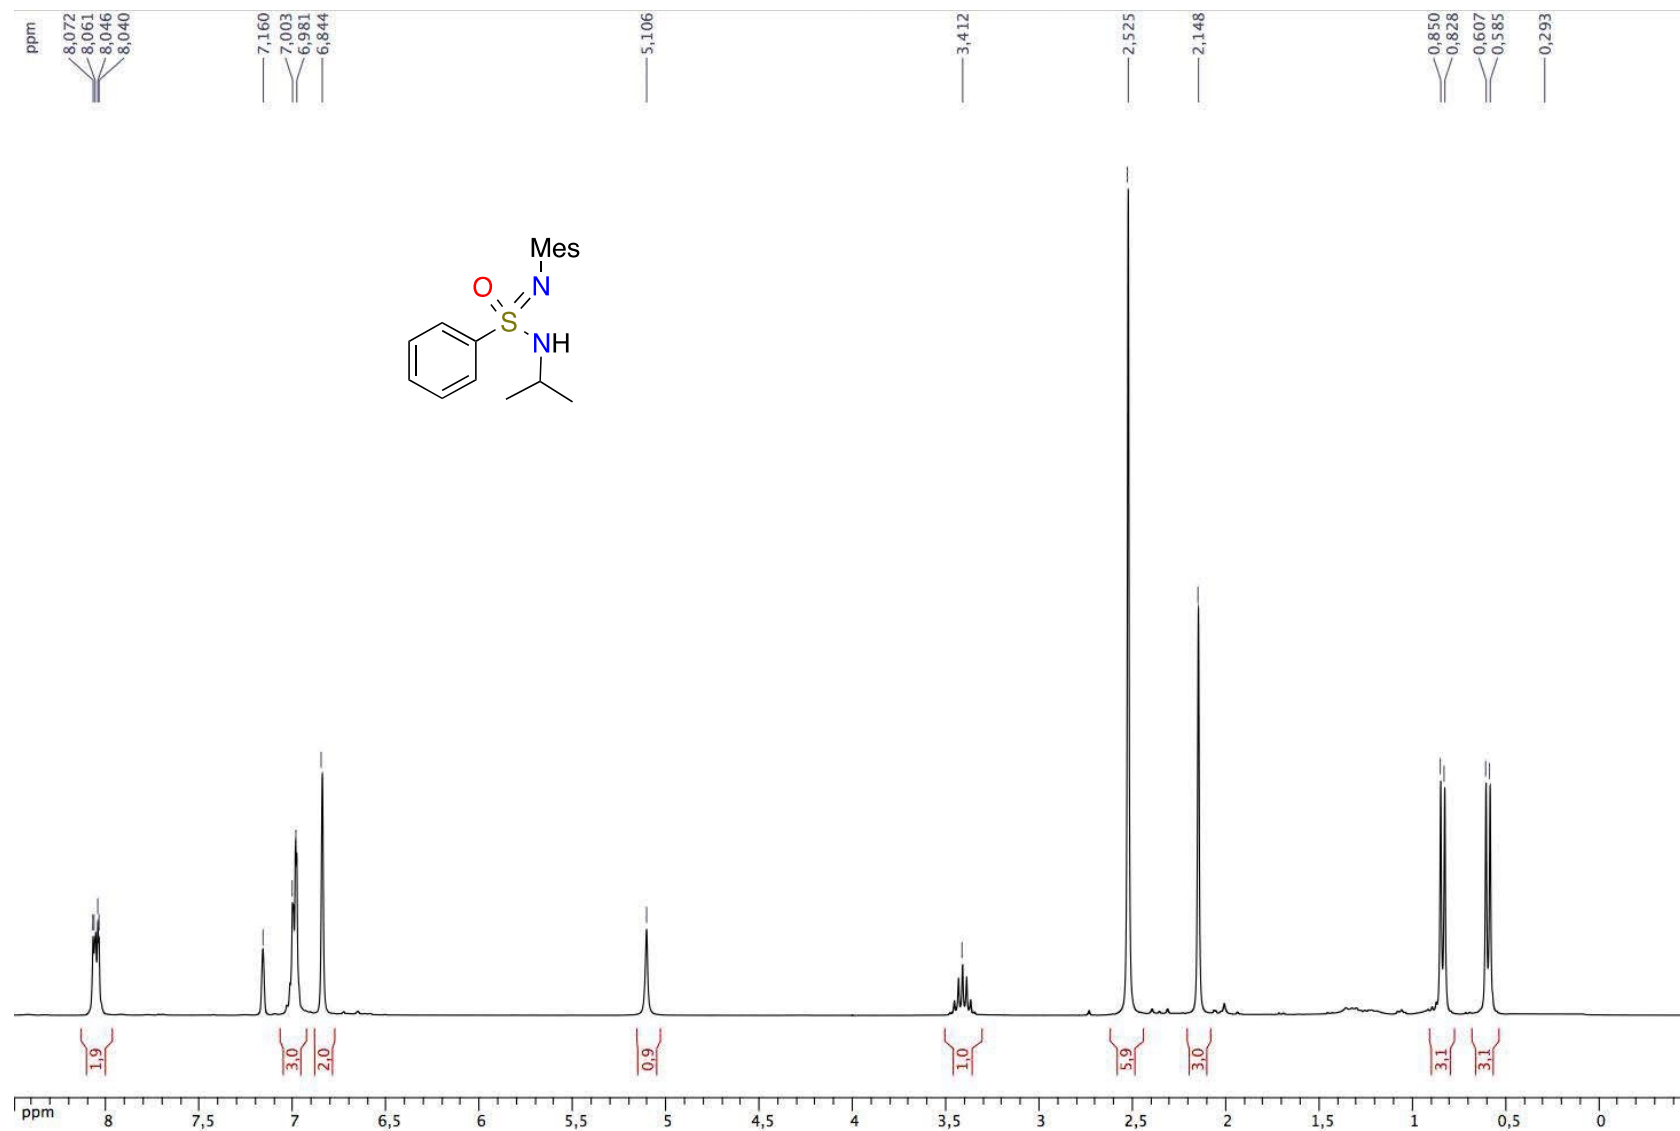

$^1\text{H}$  NMR spectrum of compound **2** ( $\text{C}_6\text{D}_6$ , 300 MHz)

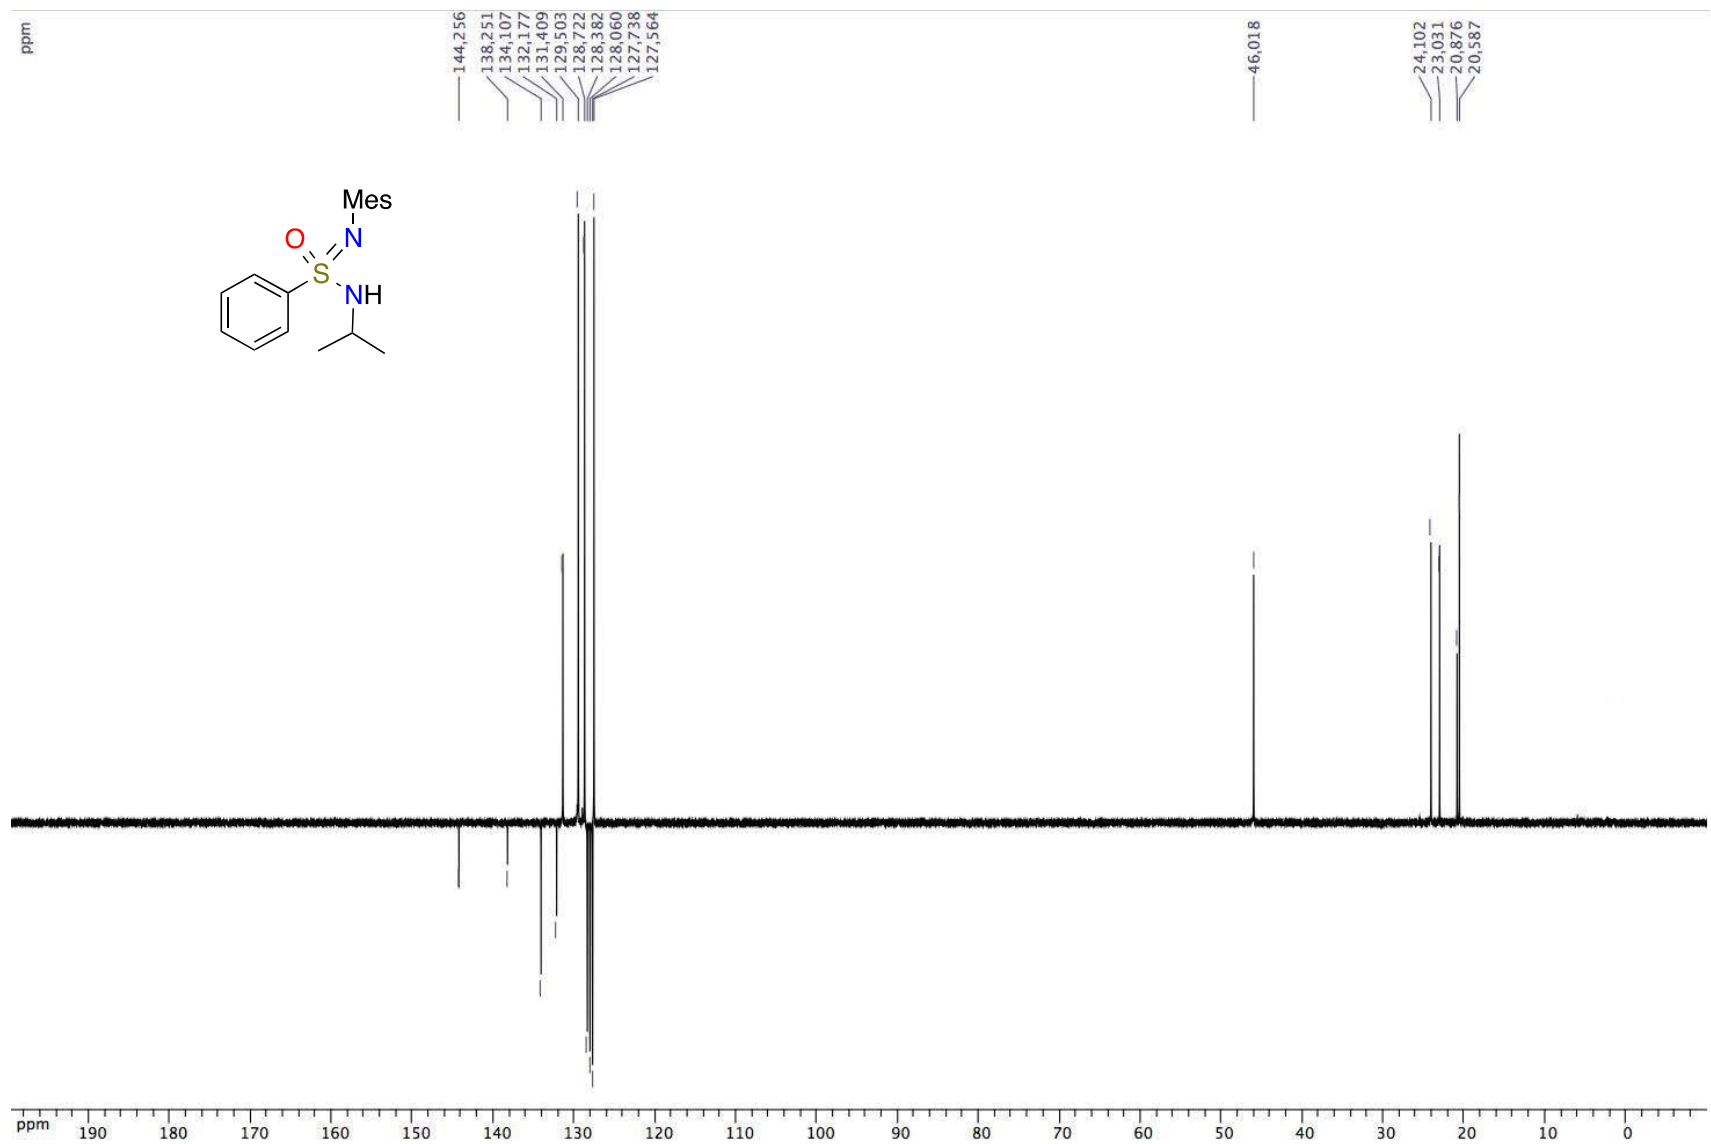

<sup>13</sup>C NMR spectrum of compound 2 (C<sub>6</sub>D<sub>6</sub>, 75 MHz)

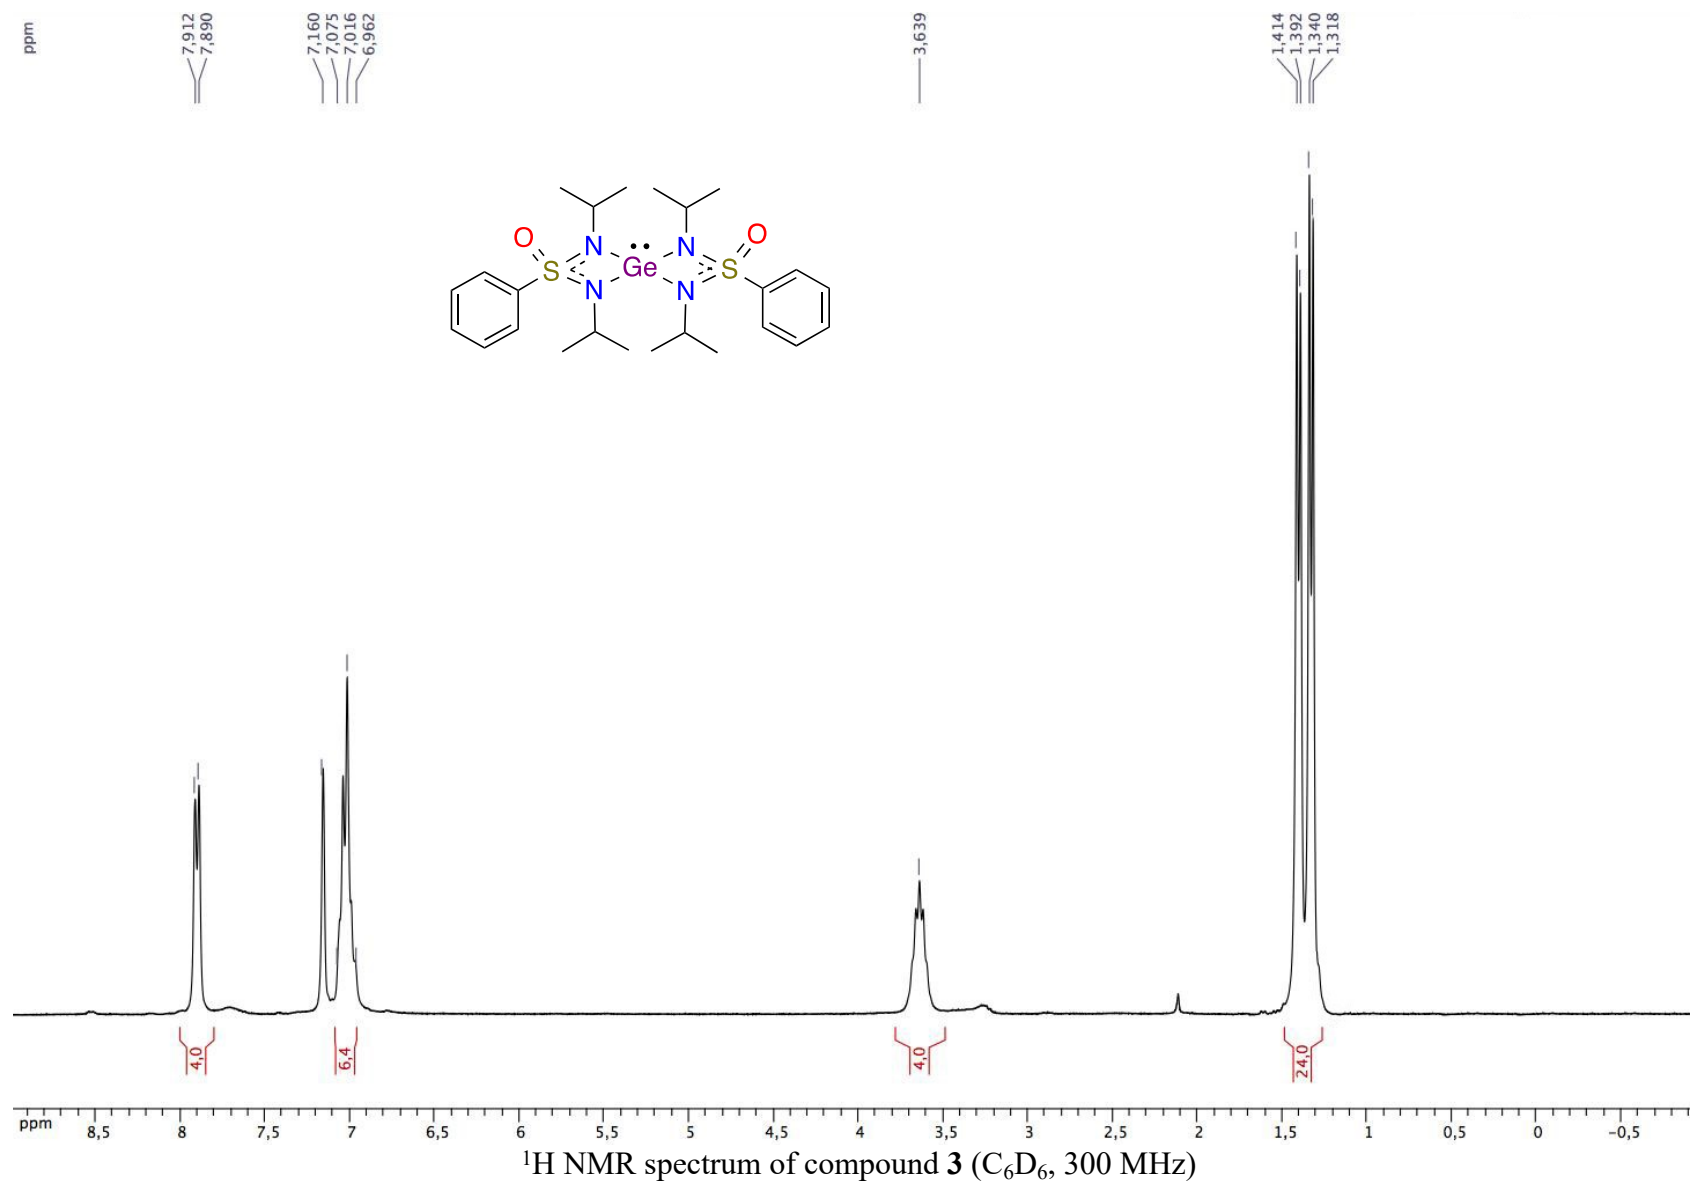

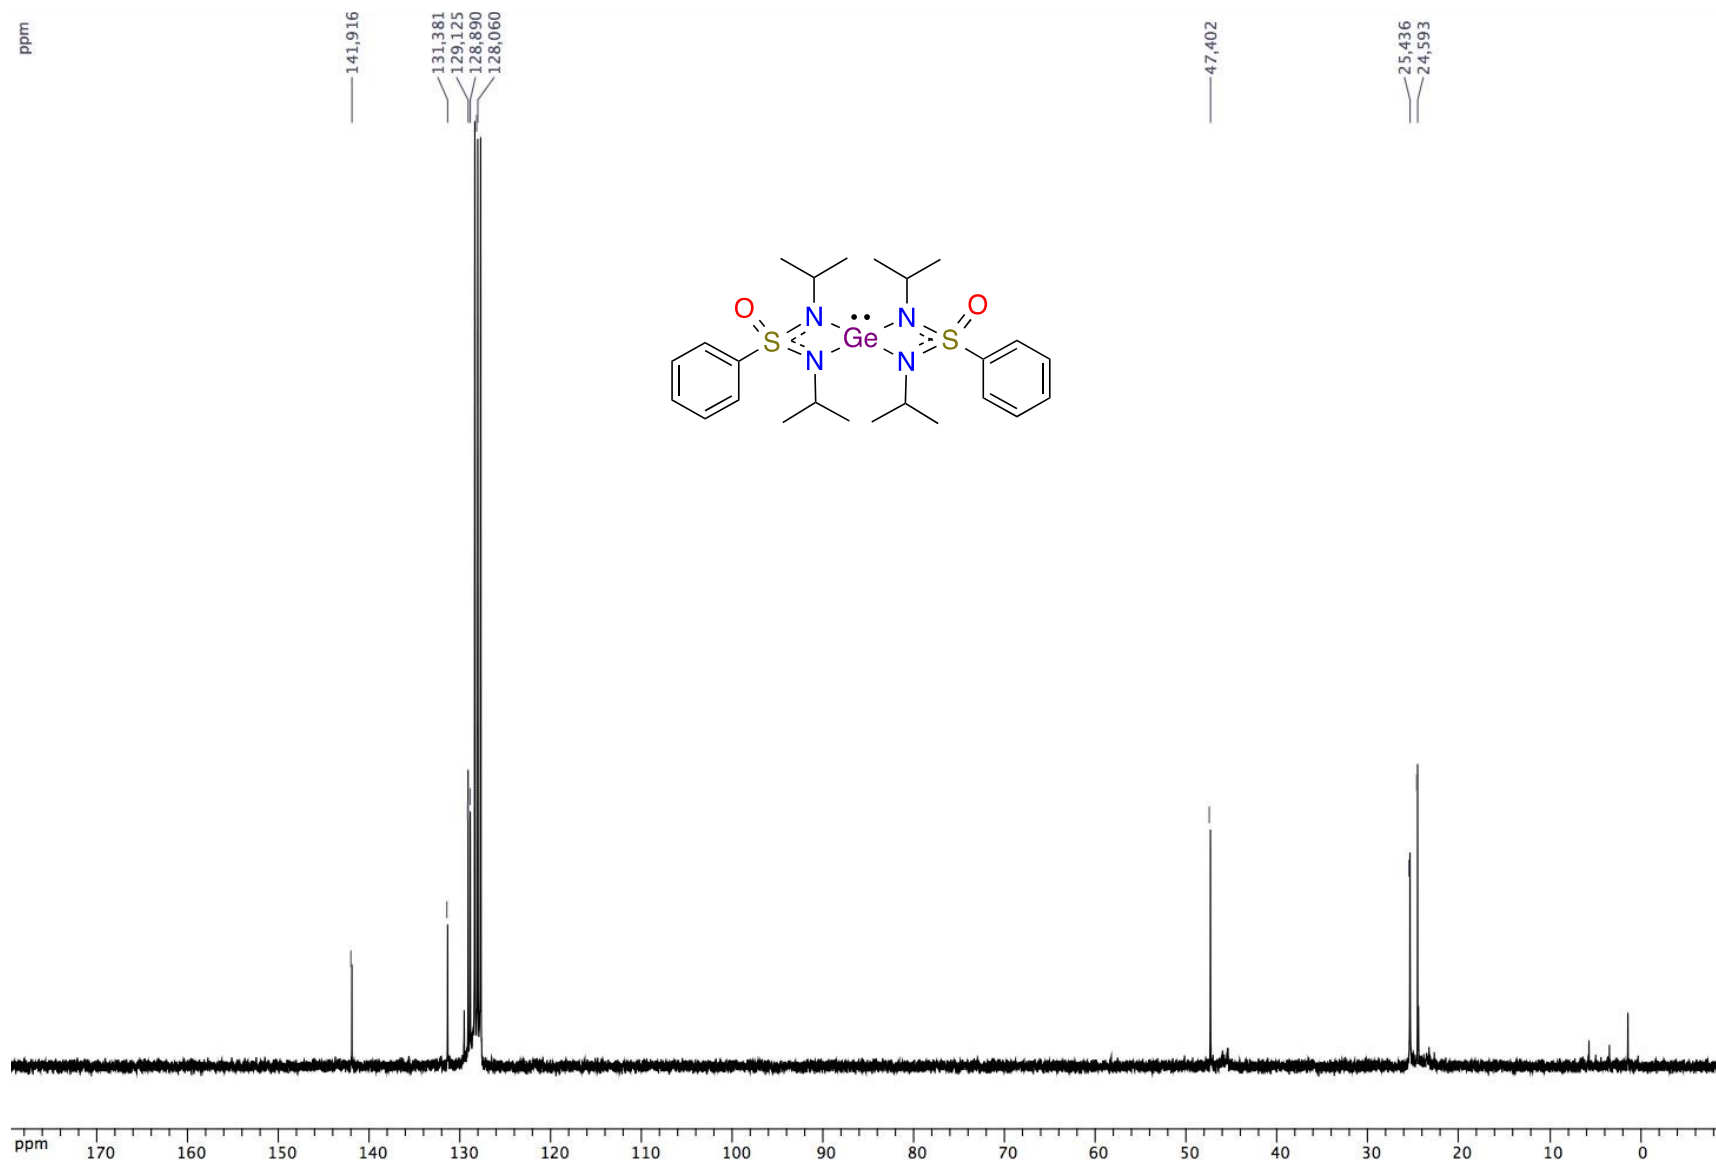

$^{13}\text{C}$  NMR spectrum of compound **3** ( $\text{C}_6\text{D}_6$ , 75 MHz)



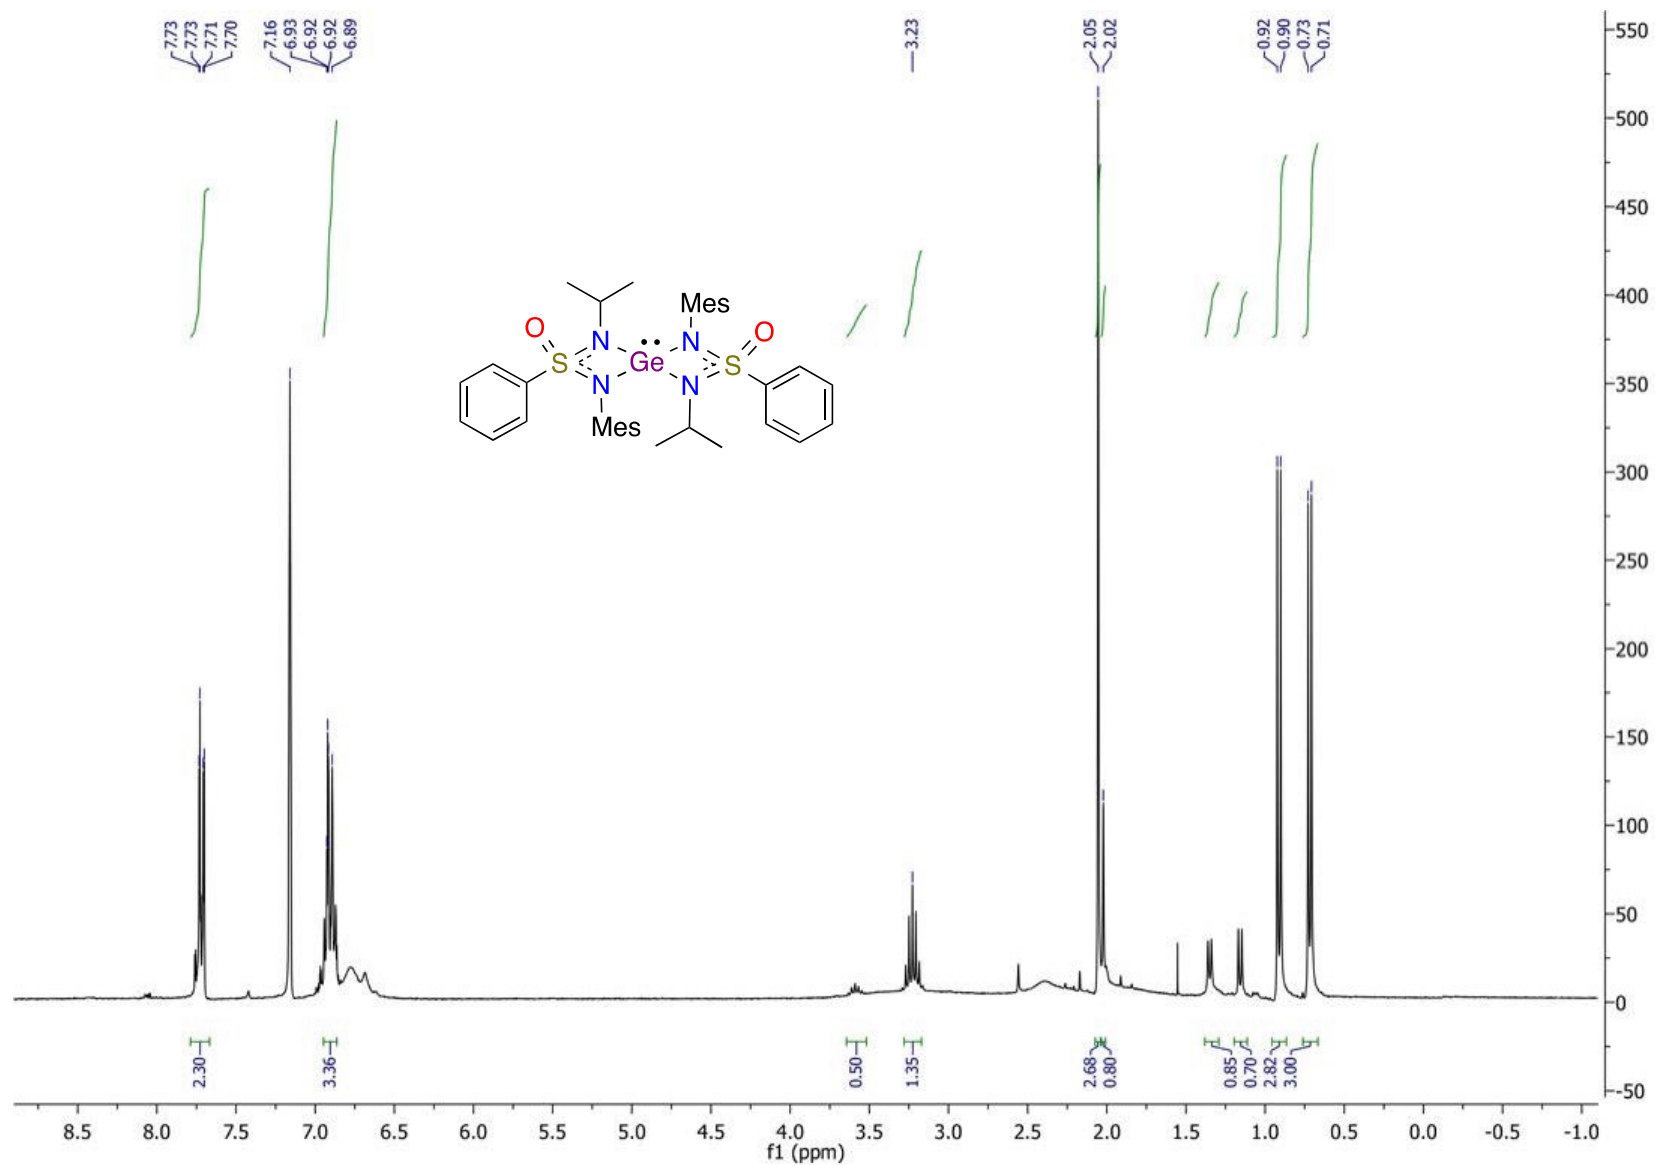

$^1\text{H}$  NMR spectrum of compound 4 ( $\text{C}_6\text{D}_6$ , 300 MHz)

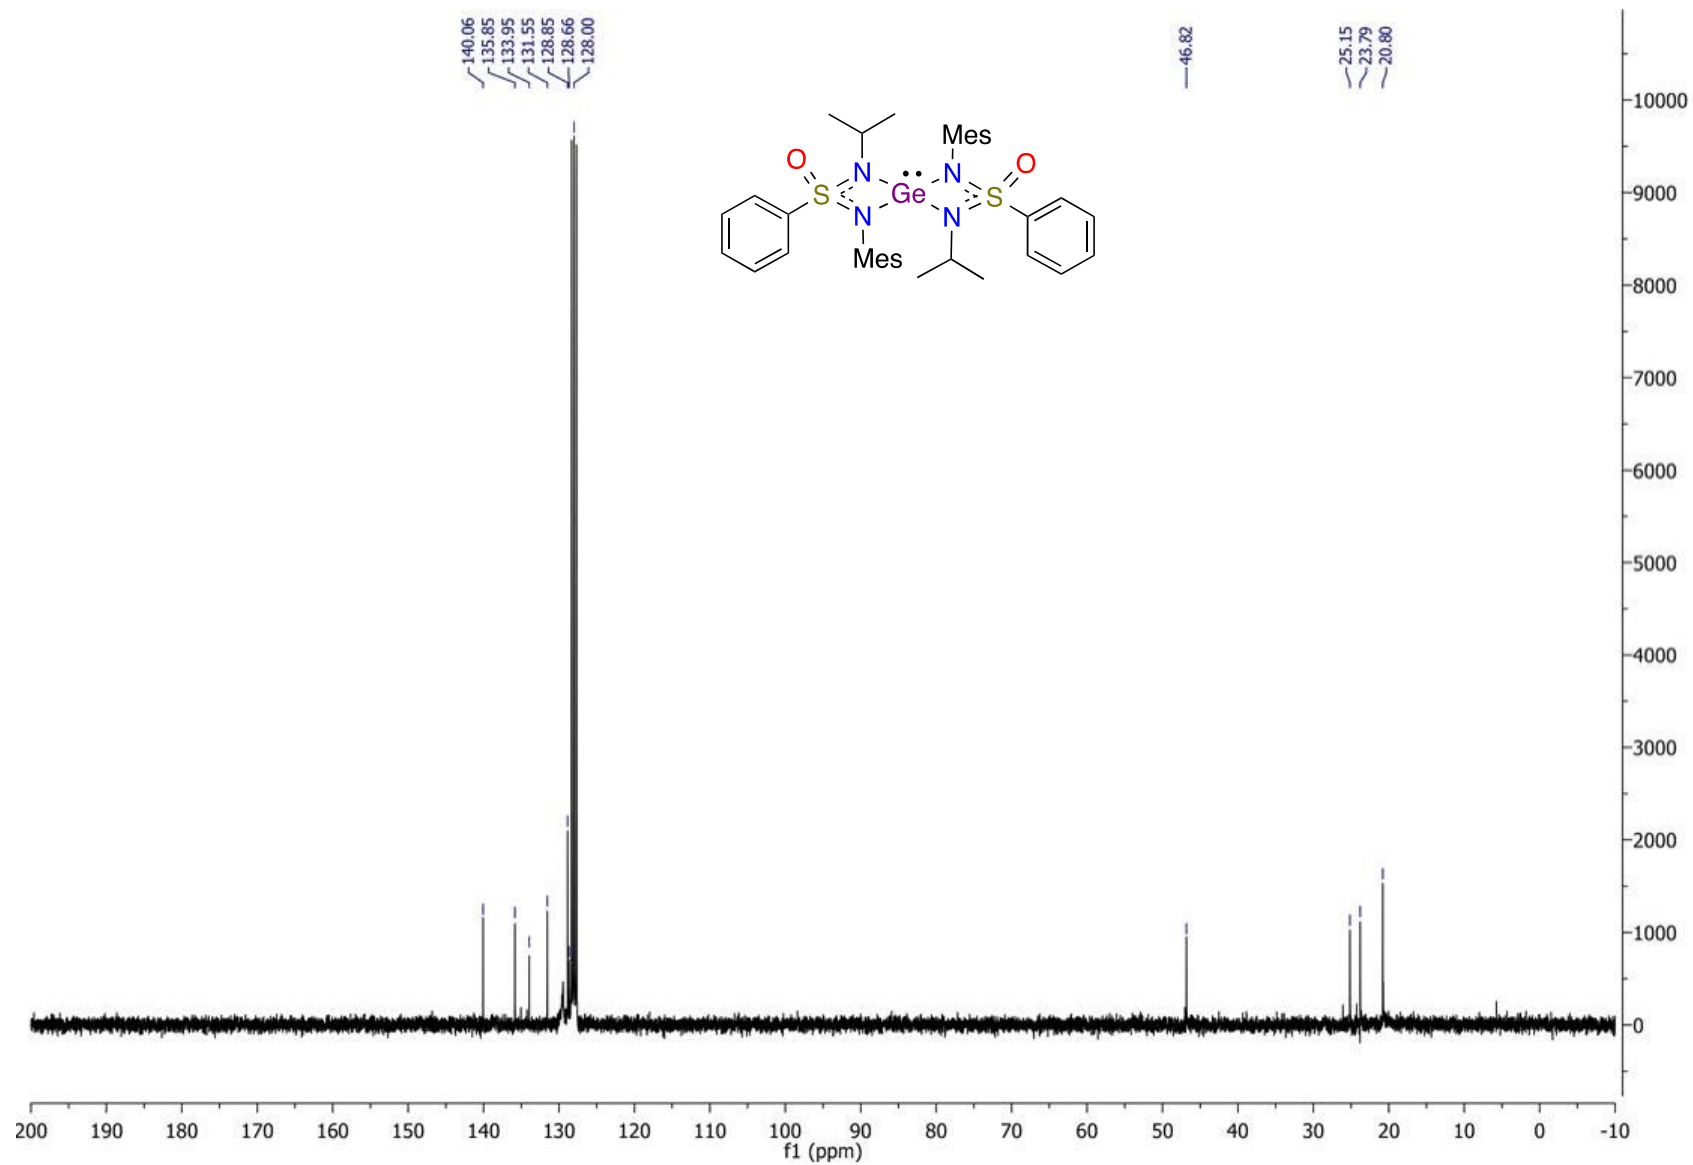

$^{13}\text{C}$  NMR spectrum of compound 4 ( $\text{C}_6\text{D}_6$ , 75 MHz)

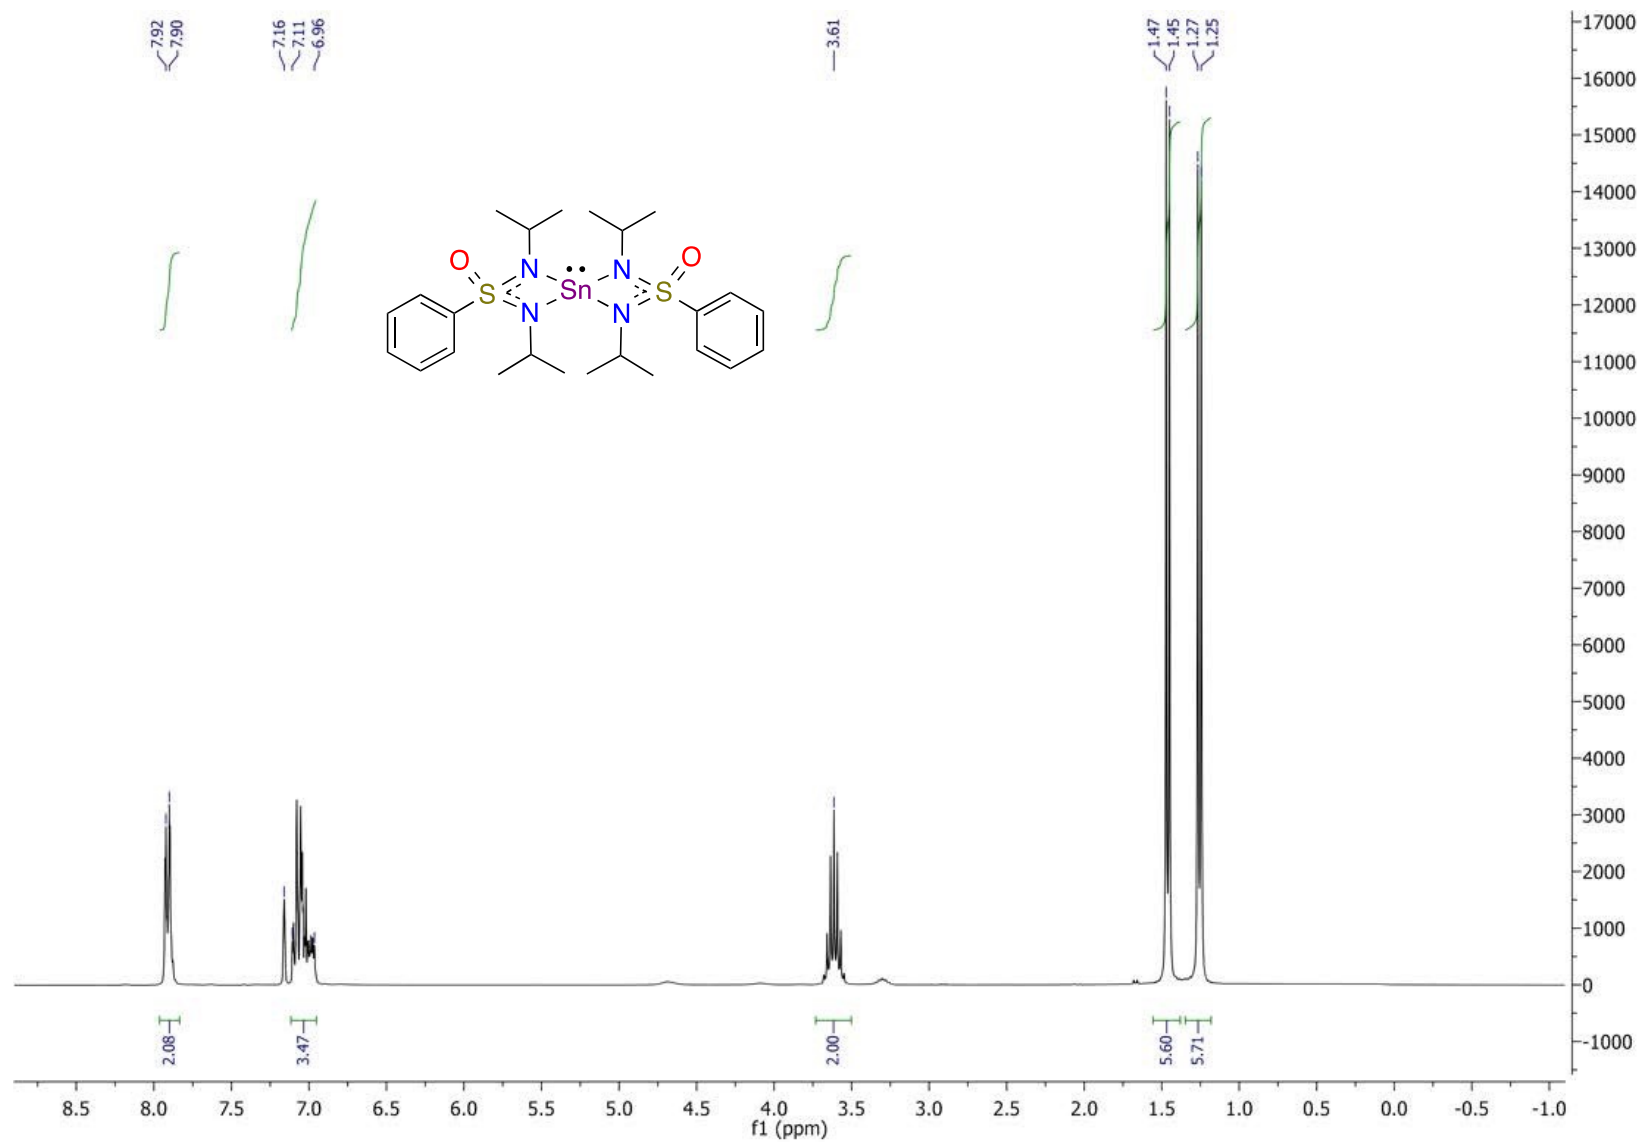

$^1\text{H}$  NMR spectrum of compound **5** ( $\text{C}_6\text{D}_6$ , 300 MHz)

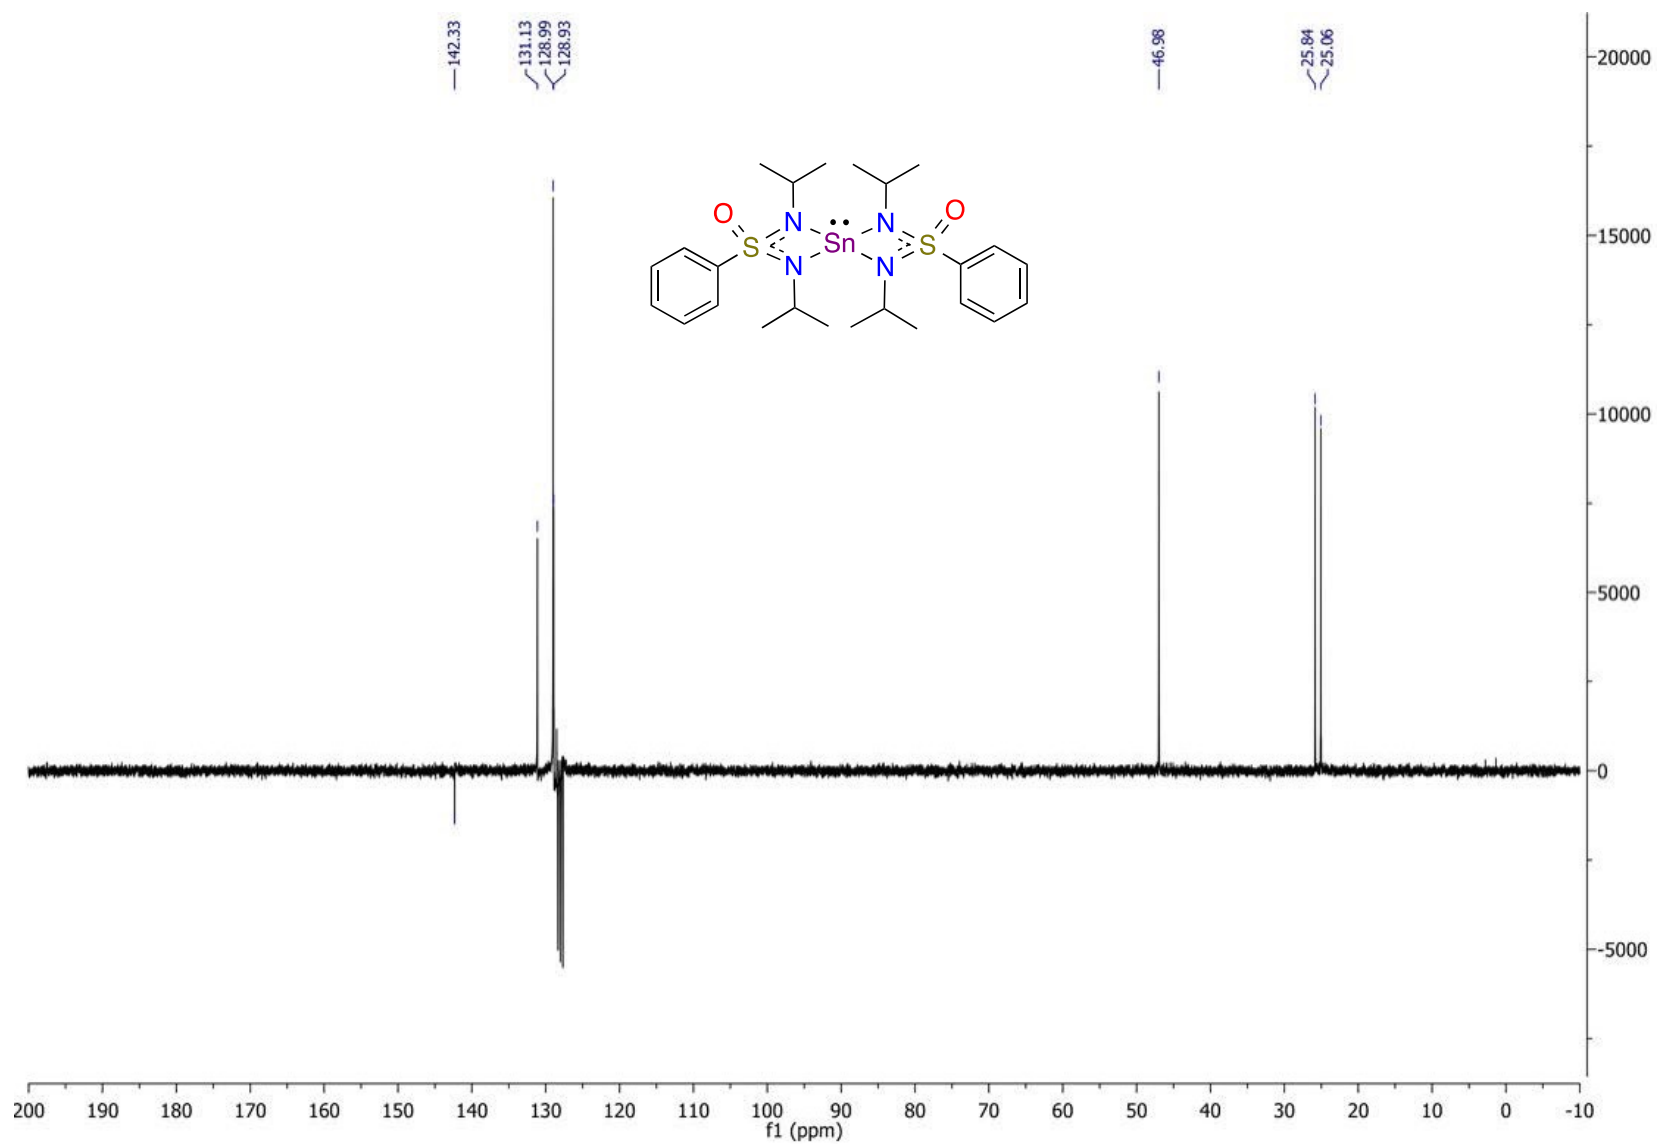

$^{13}\text{C}$  NMR spectrum of compound **5** ( $\text{C}_6\text{D}_6$ , 75 MHz)

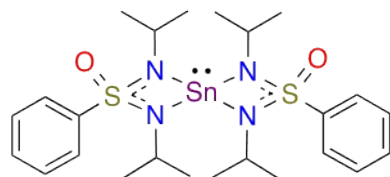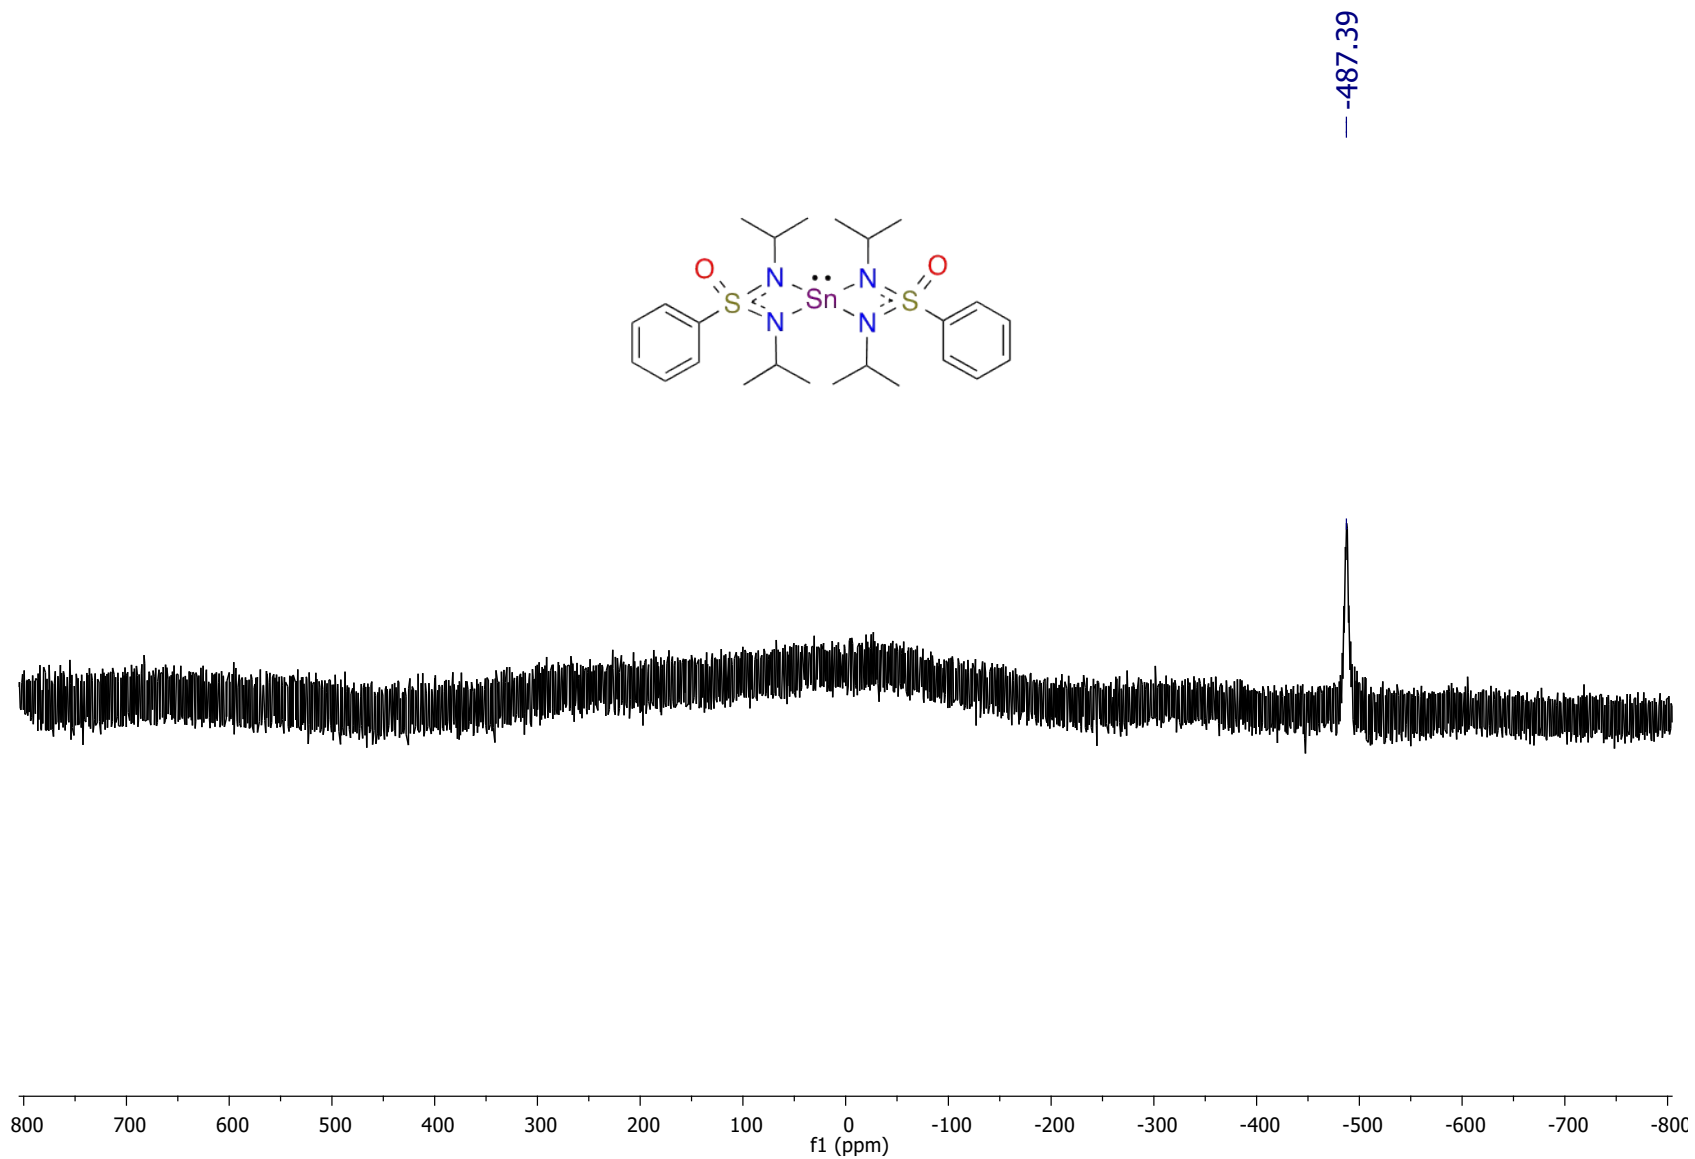

$^{119}\text{Sn}$  NMR spectrum of compound **5** ( $\text{C}_6\text{D}_6$ , 186 MHz)

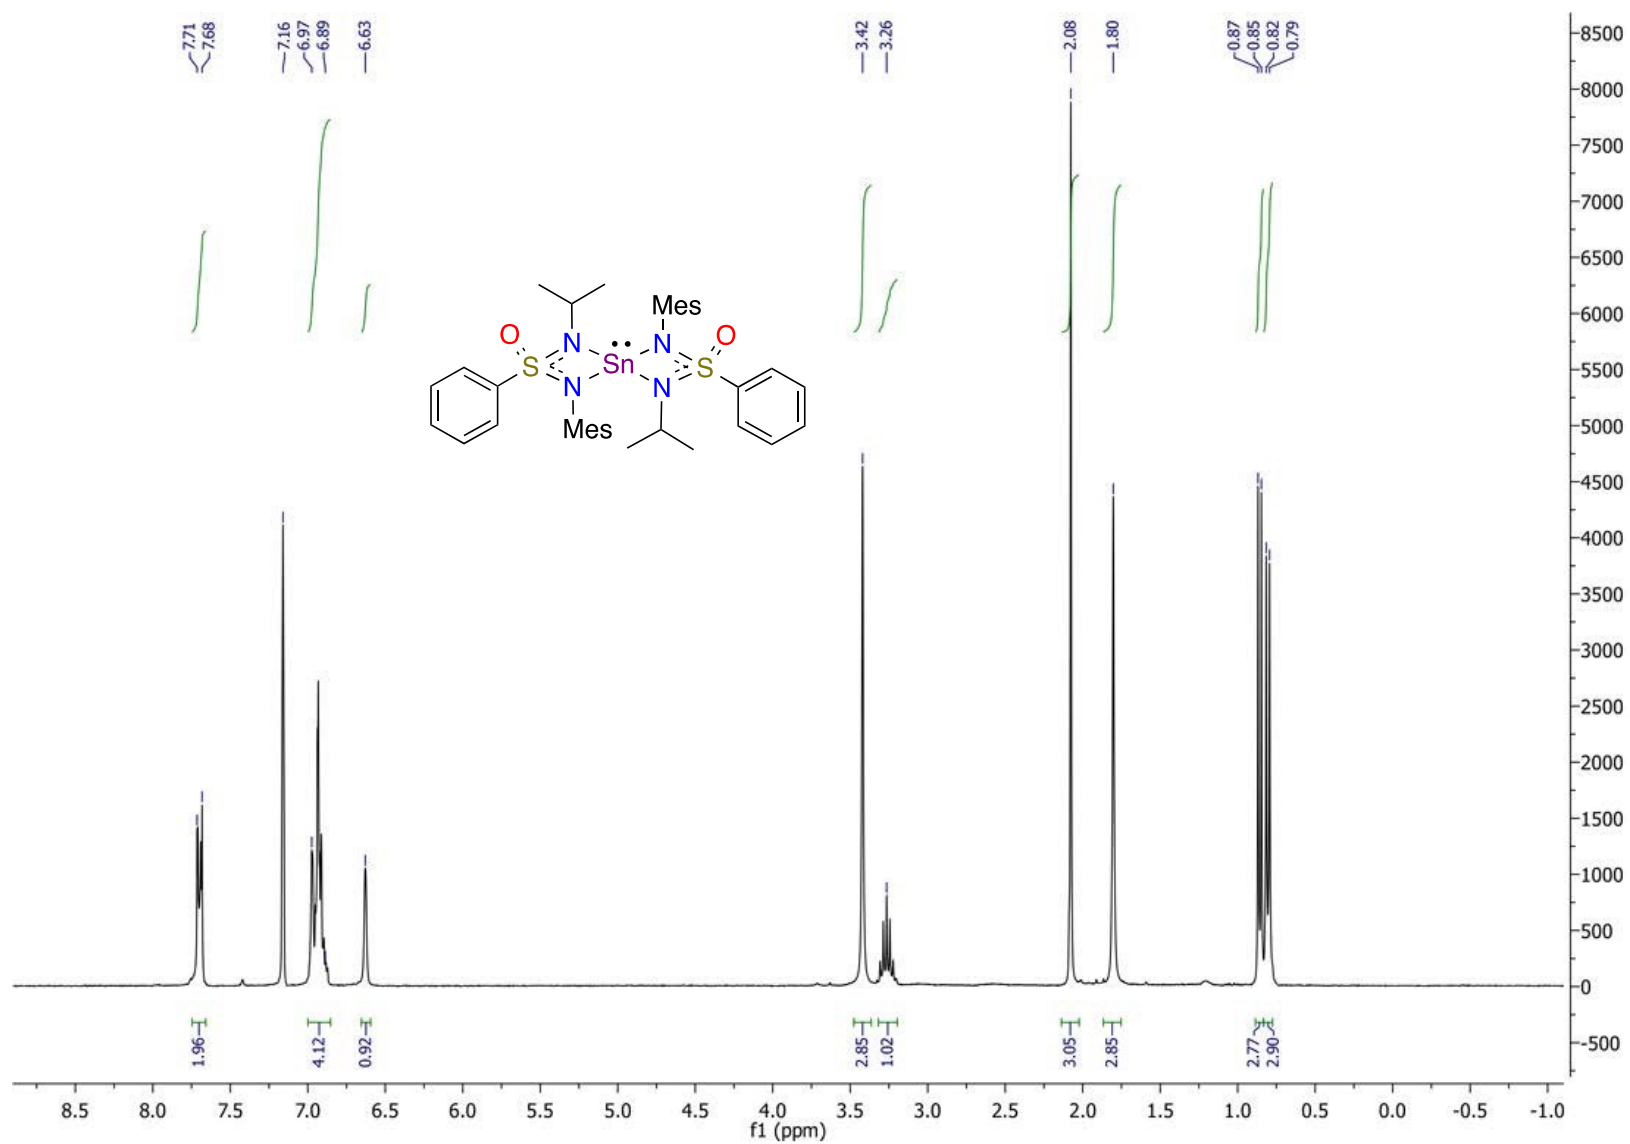

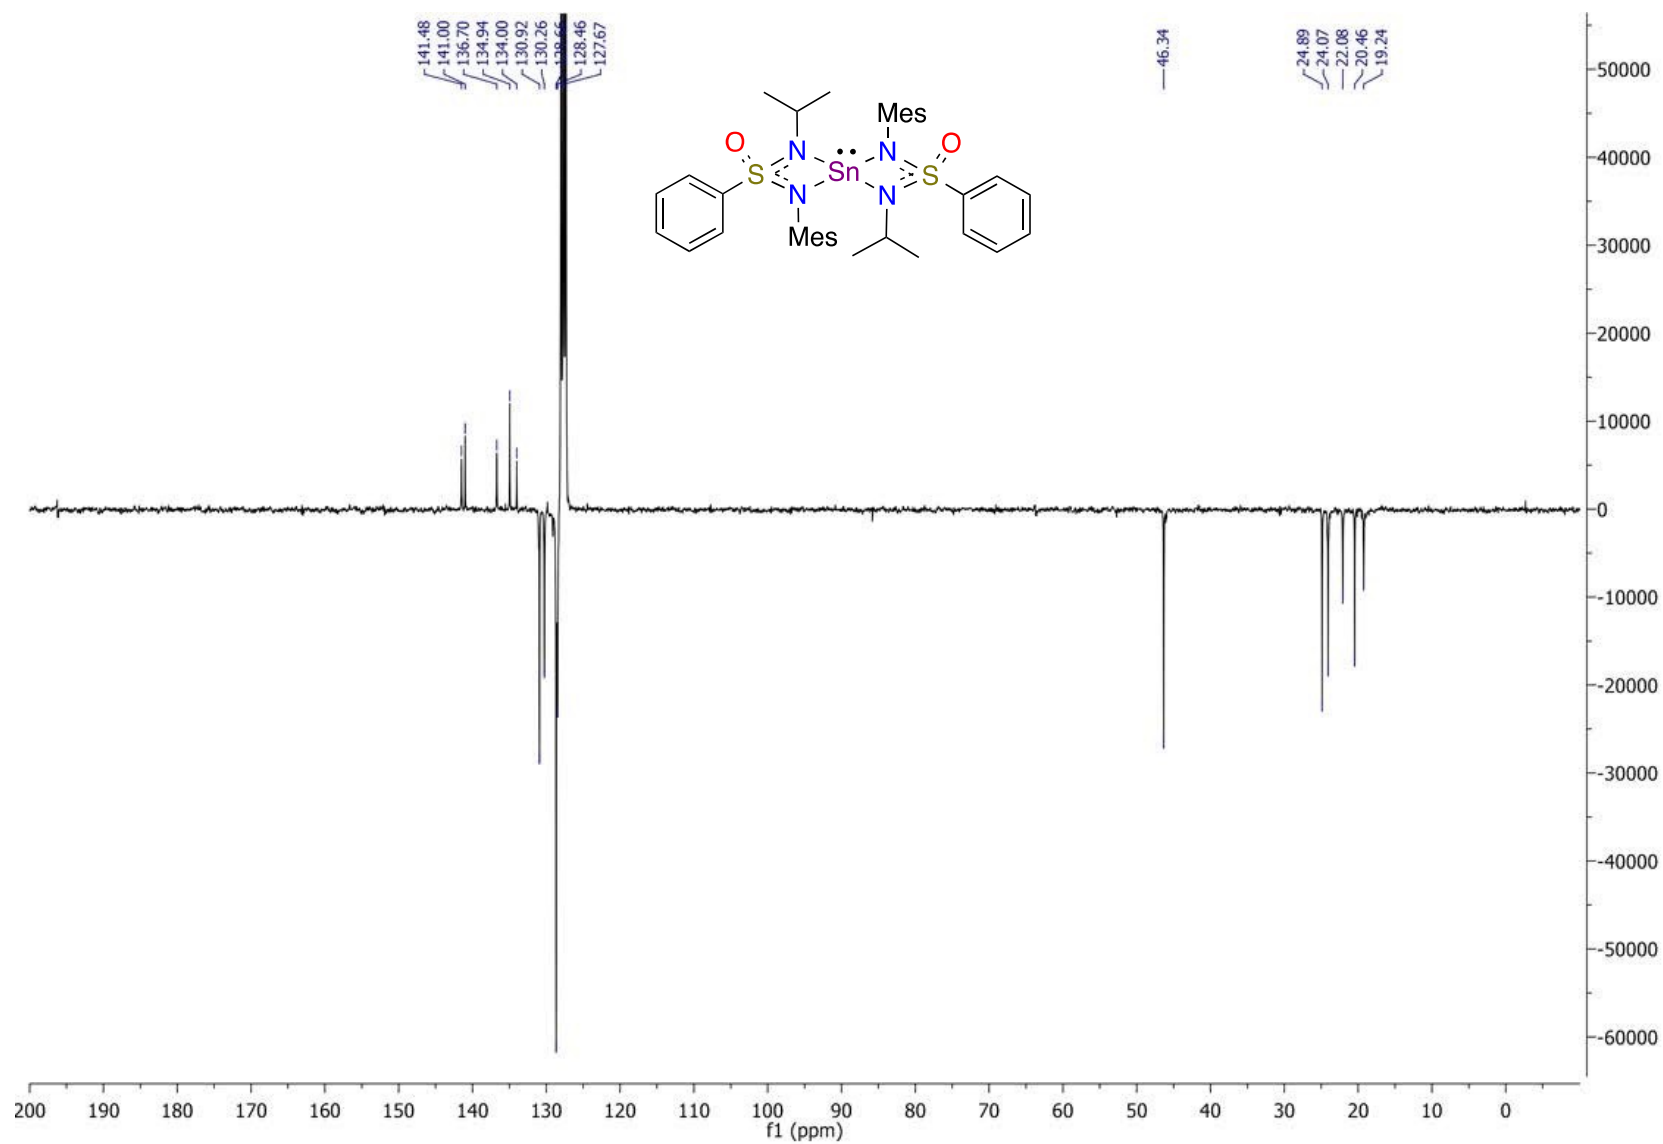

<sup>13</sup>C NMR spectrum of compound 6 (C<sub>6</sub>D<sub>6</sub>, 75 MHz)

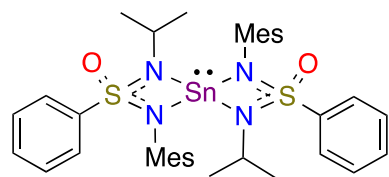

-529.71

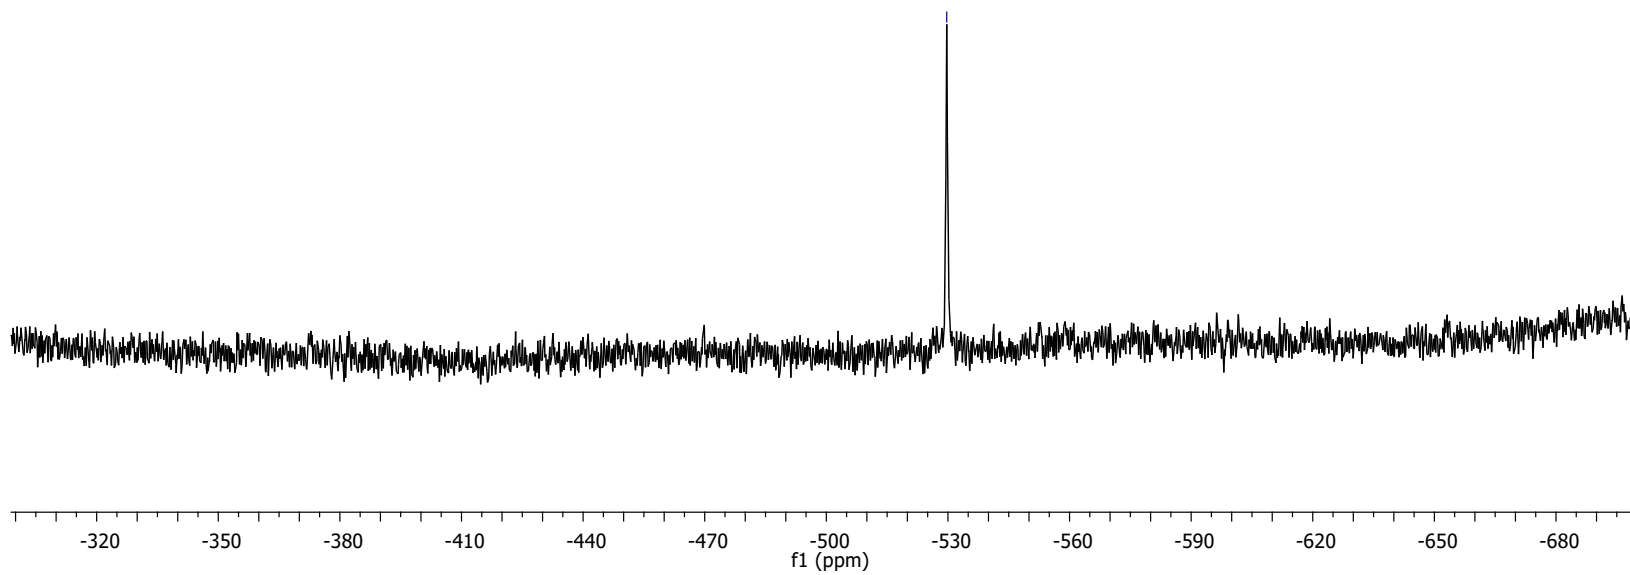

$^{119}\text{Sn}$  NMR spectrum of compound 6 ( $\text{C}_6\text{D}_6$ , 186 MHz)



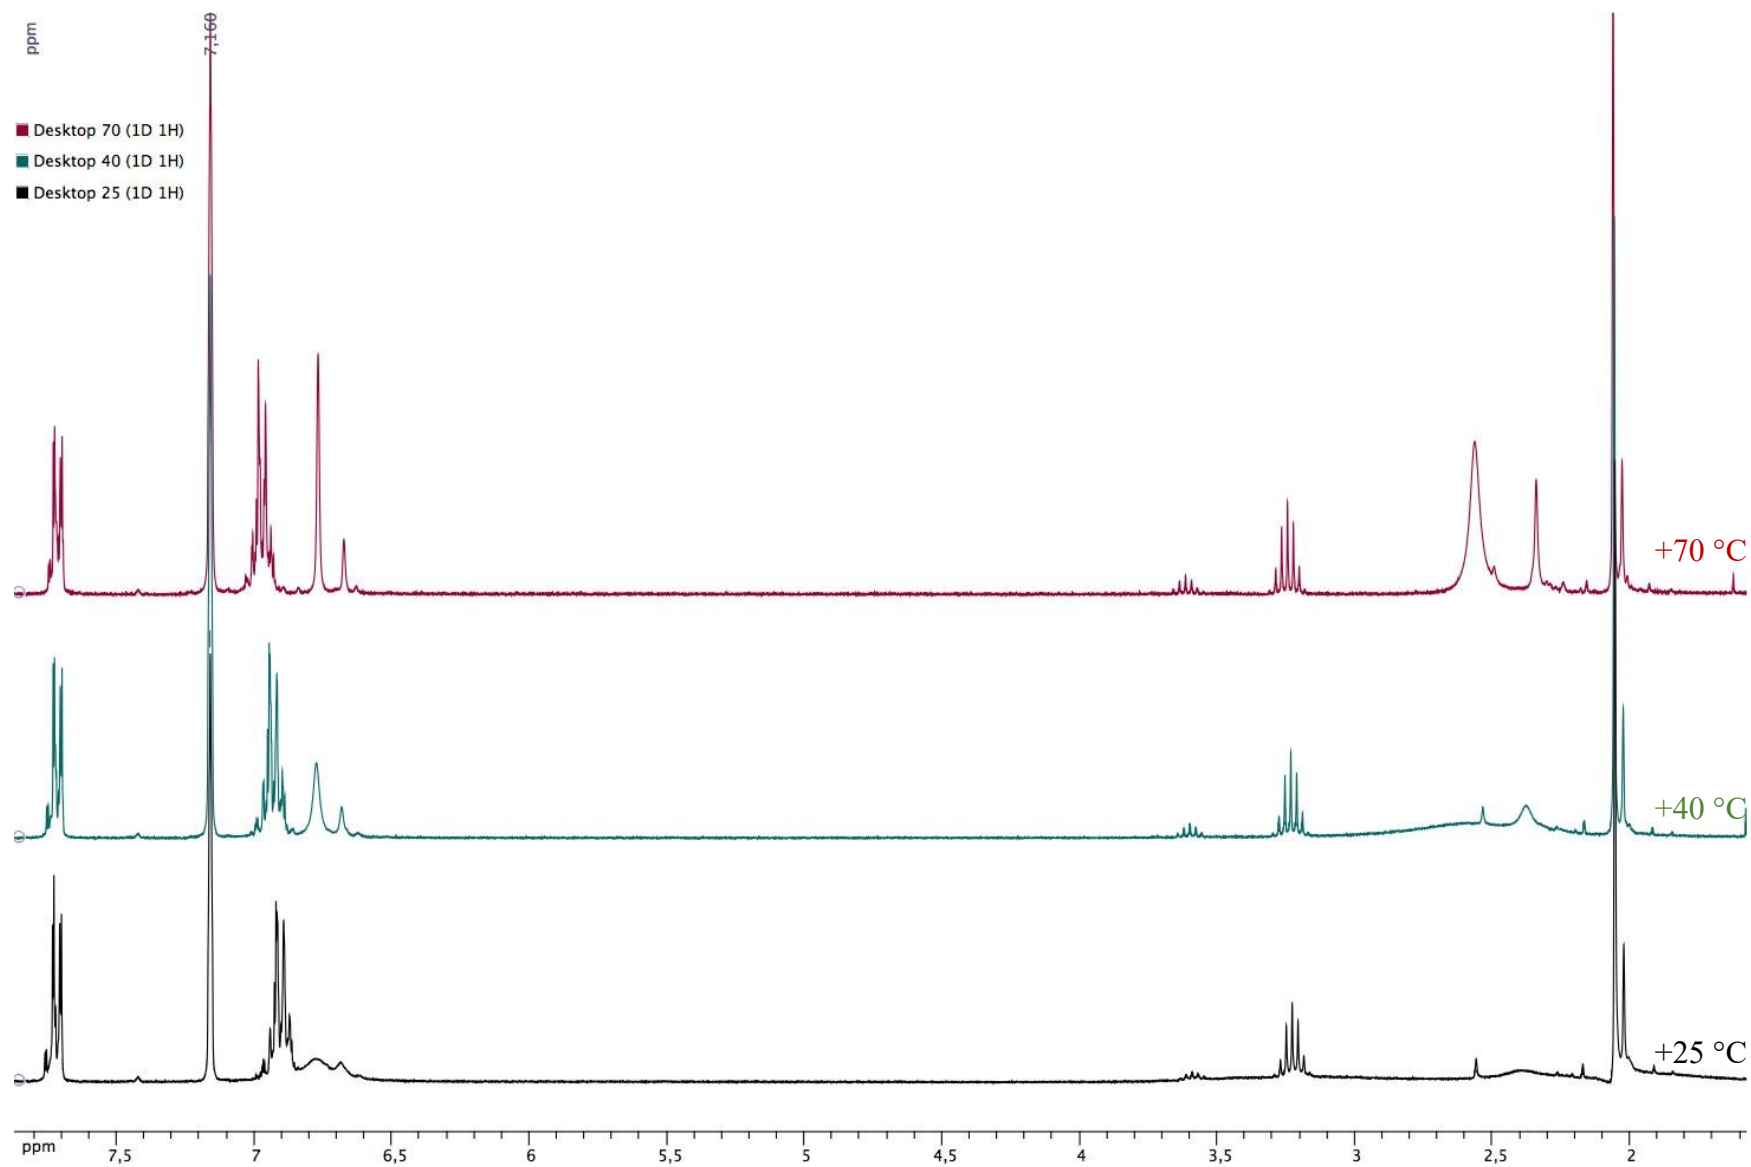

VT <sup>1</sup>H NMR spectrum of compound 4 from +20 °C to +70 °C (C<sub>6</sub>D<sub>6</sub>, 300 MHz)

## Crystal data and structure refinement of compound 1

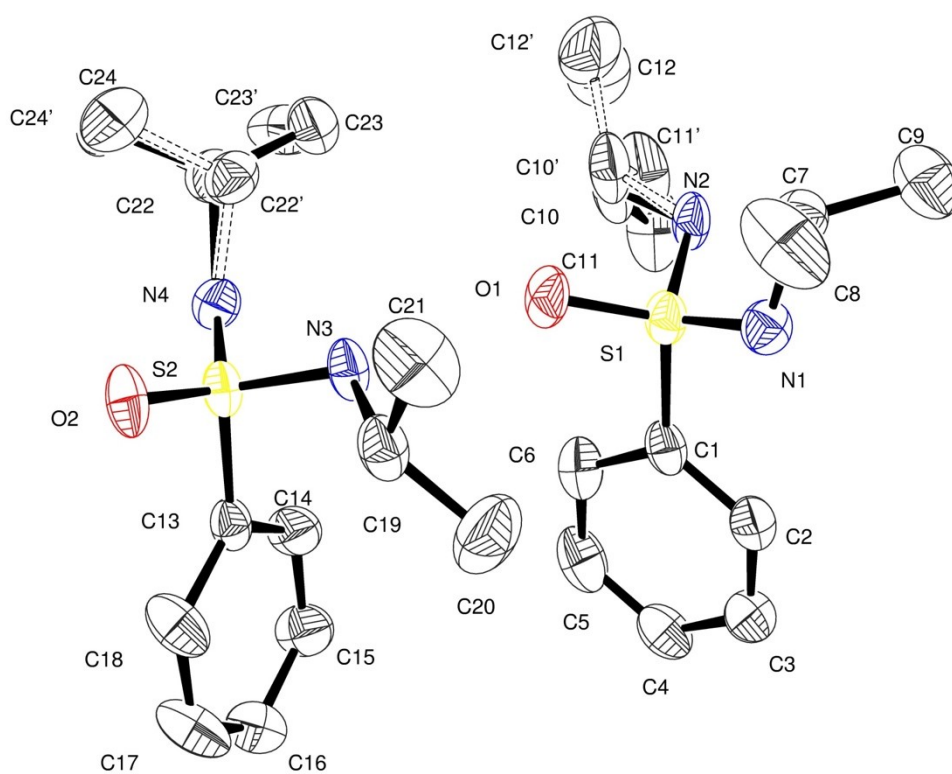

Figure 1 : Asymmetric Unit

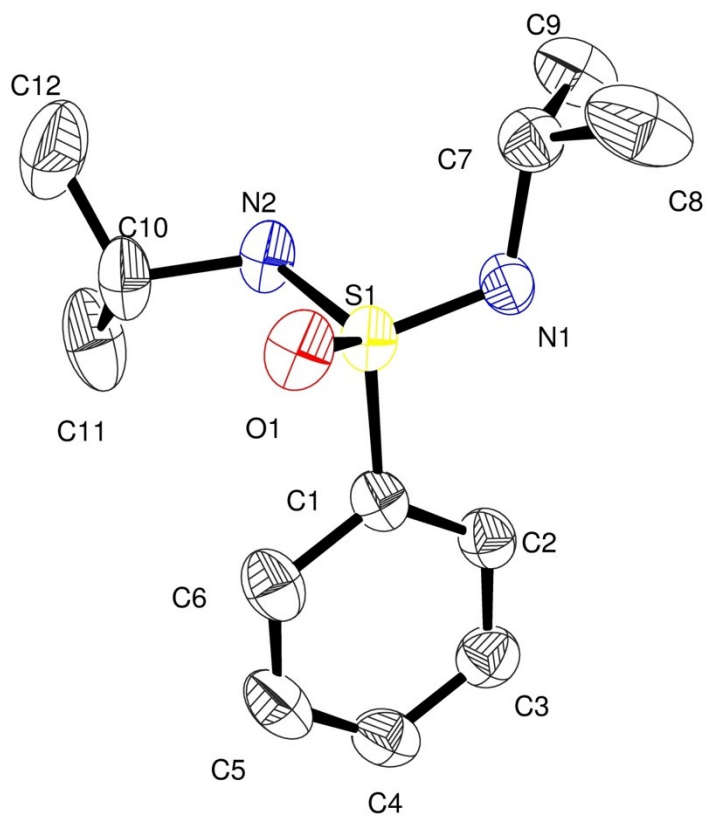

Figure 2 : Molecule

Table 1. Crystal data and structure refinement for NL265ligand.

|                                   |                                       |                   |
|-----------------------------------|---------------------------------------|-------------------|
| Identification code               | NL265ligand                           |                   |
| Empirical formula                 | C12 H20 N2 O S                        |                   |
| Formula weight                    | 240.36                                |                   |
| Temperature                       | 193(2) K                              |                   |
| Wavelength                        | 0.71073 Å                             |                   |
| Crystal system, space group       | Triclinic, P -1                       |                   |
| Unit cell dimensions              | a = 10.5404(7) Å                      | alpha = 76.984(2) |
| deg.                              | b = 10.5595(7) Å                      | beta = 88.549(2)  |
| deg.                              | c = 12.5470(9) Å                      | gamma = 89.718(2) |
| deg.                              |                                       |                   |
| Volume                            | 1360.18(16) Å <sup>3</sup>            |                   |
| Z, Calculated density             | 4, 1.174 Mg/m <sup>3</sup>            |                   |
| Absorption coefficient            | 0.222 mm <sup>-1</sup>                |                   |
| Max. and min. transmission        | 0.7451 and 0.6565                     |                   |
| F(000)                            | 520                                   |                   |
| Crystal size                      | 0.140 x 0.100 x 0.040 mm              |                   |
| Theta range for data collection   | 3.017 to 24.763 deg.                  |                   |
| Limiting indices                  | -12<=h<=12, -12<=k<=12,<br>-14<=l<=14 |                   |
| Reflections collected / unique    | 34528 / 4527 [R(int) = 0.0616]        |                   |
| Completeness to theta = 24.763    | 96.8 %                                |                   |
| Refinement method                 | Full-matrix least-squares on          |                   |
| F <sup>2</sup>                    |                                       |                   |
| Data / restraints / parameters    | 4527 / 164 / 361                      |                   |
| Goodness-of-fit on F <sup>2</sup> | 1.028                                 |                   |
| Final R indices [I>2sigma(I)]     | R1 = 0.0433, wR2 = 0.0961             |                   |
| R indices (all data)              | R1 = 0.0714, wR2 = 0.1095             |                   |
| Largest diff. peak and hole       | 0.179 and -0.334 e.Å <sup>-3</sup>    |                   |

Table 2. Atomic coordinates ( $\times 10^4$ ) and equivalent isotropic displacement parameters ( $\text{\AA}^2 \times 10^3$ ) for nl265ligand\_a. U(eq) is defined as one third of the trace of the orthogonalized  $U_{ij}$  tensor.

|        | x        | y        | z        | U (eq) |
|--------|----------|----------|----------|--------|
| C(1)   | 1859(2)  | 7727(2)  | 5731(2)  | 34(1)  |
| C(2)   | 1310(2)  | 8838(3)  | 5130(2)  | 39(1)  |
| C(3)   | 1307(2)  | 9048(3)  | 3999(2)  | 45(1)  |
| C(4)   | 1849(2)  | 8159(3)  | 3481(2)  | 46(1)  |
| C(5)   | 2400(2)  | 7053(3)  | 4082(2)  | 53(1)  |
| C(6)   | 2412(2)  | 6835(3)  | 5206(2)  | 49(1)  |
| C(7)   | 1144(2)  | 8616(3)  | 8637(2)  | 43(1)  |
| C(8)   | 2031(3)  | 9588(4)  | 8947(3)  | 80(1)  |
| C(9)   | -218(3)  | 8946(4)  | 8840(2)  | 61(1)  |
| N(2)   | 832(2)   | 6216(2)  | 7642(2)  | 38(1)  |
| C(10)  | 1050(16) | 4854(9)  | 7578(12) | 52(2)  |
| C(11)  | 171(10)  | 4512(13) | 6750(14) | 74(3)  |
| C(12)  | 872(14)  | 3986(12) | 8698(13) | 82(3)  |
| C(10') | 1110(20) | 4819(11) | 7846(15) | 55(3)  |
| C(11') | 163(13)  | 4112(14) | 7315(18) | 76(3)  |
| C(12') | 1179(16) | 4248(16) | 9072(14) | 77(4)  |
| C(13)  | 6876(2)  | 6787(2)  | 5821(2)  | 31(1)  |
| C(14)  | 5918(2)  | 6392(3)  | 5238(2)  | 43(1)  |
| C(15)  | 5940(2)  | 6750(3)  | 4111(2)  | 47(1)  |
| C(16)  | 6903(2)  | 7526(3)  | 3564(2)  | 47(1)  |
| C(17)  | 7844(3)  | 7931(3)  | 4139(2)  | 60(1)  |
| C(18)  | 7852(2)  | 7557(3)  | 5267(2)  | 50(1)  |
| C(19)  | 6101(2)  | 8809(2)  | 7476(2)  | 42(1)  |
| C(20)  | 5268(3)  | 9587(3)  | 6610(3)  | 72(1)  |
| C(21)  | 5993(3)  | 9216(4)  | 8558(3)  | 72(1)  |
| N(1)   | 1361(2)  | 8615(2)  | 7458(2)  | 38(1)  |
| N(3)   | 5813(2)  | 7413(2)  | 7655(2)  | 34(1)  |
| N(4)   | 6275(2)  | 5057(2)  | 7558(2)  | 35(1)  |
| C(22)  | 6014(16) | 4400(20) | 8729(14) | 44(3)  |
| C(23)  | 4624(14) | 4026(19) | 8864(17) | 50(4)  |
| C(24)  | 6824(12) | 3159(19) | 9027(15) | 72(4)  |
| C(22') | 5844(8)  | 4515(11) | 8714(7)  | 41(2)  |
| C(23') | 4760(10) | 3595(12) | 8701(9)  | 67(3)  |
| C(24') | 6930(6)  | 3828(13) | 9372(6)  | 79(3)  |
| O(1)   | 3063(1)  | 6806(2)  | 7519(1)  | 44(1)  |
| O(2)   | 8031(1)  | 6754(2)  | 7622(1)  | 43(1)  |
| S(1)   | 1837(1)  | 7382(1)  | 7184(1)  | 34(1)  |
| S(2)   | 6806(1)  | 6411(1)  | 7266(1)  | 32(1)  |

Table 3. Bond lengths [Å] and angles [deg] for  
nl265ligand\_a.

---

|               |            |
|---------------|------------|
| C(1)-C(2)     | 1.377(3)   |
| C(1)-C(6)     | 1.384(4)   |
| C(1)-S(1)     | 1.776(2)   |
| C(2)-C(3)     | 1.386(4)   |
| C(2)-H(2)     | 0.9500     |
| C(3)-C(4)     | 1.372(4)   |
| C(3)-H(3)     | 0.9500     |
| C(4)-C(5)     | 1.374(4)   |
| C(4)-H(4)     | 0.9500     |
| C(5)-C(6)     | 1.377(4)   |
| C(5)-H(5)     | 0.9500     |
| C(6)-H(6)     | 0.9500     |
| C(7)-N(1)     | 1.491(3)   |
| C(7)-C(9)     | 1.505(4)   |
| C(7)-C(8)     | 1.512(4)   |
| C(7)-H(7)     | 1.0000     |
| C(8)-H(8A)    | 0.9800     |
| C(8)-H(8B)    | 0.9800     |
| C(8)-H(8C)    | 0.9800     |
| C(9)-H(9A)    | 0.9800     |
| C(9)-H(9B)    | 0.9800     |
| C(9)-H(9C)    | 0.9800     |
| N(2)-C(10')   | 1.467(12)  |
| N(2)-C(10)    | 1.475(10)  |
| N(2)-S(1)     | 1.6226(19) |
| N(2)-H(2A)    | 0.870(10)  |
| C(10)-C(12)   | 1.503(10)  |
| C(10)-C(11)   | 1.513(10)  |
| C(10)-H(10)   | 1.0000     |
| C(11)-H(11A)  | 0.9800     |
| C(11)-H(11B)  | 0.9800     |
| C(11)-H(11C)  | 0.9800     |
| C(12)-H(12A)  | 0.9800     |
| C(12)-H(12B)  | 0.9800     |
| C(12)-H(12C)  | 0.9800     |
| C(10')-C(11') | 1.501(12)  |
| C(10')-C(12') | 1.524(12)  |
| C(10')-H(10') | 1.0000     |
| C(11')-H(11D) | 0.9800     |
| C(11')-H(11E) | 0.9800     |
| C(11')-H(11F) | 0.9800     |
| C(12')-H(12D) | 0.9800     |
| C(12')-H(12E) | 0.9800     |
| C(12')-H(12F) | 0.9800     |
| C(13)-C(14)   | 1.380(3)   |
| C(13)-C(18)   | 1.385(3)   |
| C(13)-S(2)    | 1.767(2)   |
| C(14)-C(15)   | 1.379(4)   |
| C(14)-H(14)   | 0.9500     |
| C(15)-C(16)   | 1.376(3)   |
| C(15)-H(15)   | 0.9500     |
| C(16)-C(17)   | 1.366(4)   |
| C(16)-H(16)   | 0.9500     |

|                     |             |
|---------------------|-------------|
| C (17) -C (18)      | 1.382 (4)   |
| C (17) -H (17)      | 0.9500      |
| C (18) -H (18)      | 0.9500      |
| C (19) -N (3)       | 1.472 (3)   |
| C (19) -C (20)      | 1.505 (4)   |
| C (19) -C (21)      | 1.515 (4)   |
| C (19) -H (19)      | 1.0000      |
| C (20) -H (20A)     | 0.9800      |
| C (20) -H (20B)     | 0.9800      |
| C (20) -H (20C)     | 0.9800      |
| C (21) -H (21A)     | 0.9800      |
| C (21) -H (21B)     | 0.9800      |
| C (21) -H (21C)     | 0.9800      |
| N (1) -S (1)        | 1.501 (2)   |
| N (3) -S (2)        | 1.628 (2)   |
| N (3) -H (3A)       | 0.868 (10)  |
| N (4) -C (22')      | 1.494 (7)   |
| N (4) -C (22)       | 1.497 (14)  |
| N (4) -S (2)        | 1.501 (2)   |
| C (22) -C (23)      | 1.513 (14)  |
| C (22) -C (24)      | 1.536 (16)  |
| C (22) -H (22)      | 1.0000      |
| C (23) -H (23A)     | 0.9800      |
| C (23) -H (23B)     | 0.9800      |
| C (23) -H (23C)     | 0.9800      |
| C (24) -H (24A)     | 0.9800      |
| C (24) -H (24B)     | 0.9800      |
| C (24) -H (24C)     | 0.9800      |
| C (22') -C (23')    | 1.506 (10)  |
| C (22') -C (24')    | 1.512 (8)   |
| C (22') -H (22')    | 1.0000      |
| C (23') -H (23D)    | 0.9800      |
| C (23') -H (23E)    | 0.9800      |
| C (23') -H (23F)    | 0.9800      |
| C (24') -H (24D)    | 0.9800      |
| C (24') -H (24E)    | 0.9800      |
| C (24') -H (24F)    | 0.9800      |
| O (1) -S (1)        | 1.4562 (15) |
| O (2) -S (2)        | 1.4506 (15) |
|                     |             |
| C (2) -C (1) -C (6) | 120.1 (2)   |
| C (2) -C (1) -S (1) | 121.3 (2)   |
| C (6) -C (1) -S (1) | 118.61 (19) |
| C (1) -C (2) -C (3) | 119.5 (3)   |
| C (1) -C (2) -H (2) | 120.3       |
| C (3) -C (2) -H (2) | 120.3       |
| C (4) -C (3) -C (2) | 120.4 (3)   |
| C (4) -C (3) -H (3) | 119.8       |
| C (2) -C (3) -H (3) | 119.8       |
| C (3) -C (4) -C (5) | 120.1 (3)   |
| C (3) -C (4) -H (4) | 120.0       |
| C (5) -C (4) -H (4) | 120.0       |
| C (4) -C (5) -C (6) | 120.1 (3)   |
| C (4) -C (5) -H (5) | 119.9       |
| C (6) -C (5) -H (5) | 119.9       |
| C (5) -C (6) -C (1) | 119.9 (3)   |
| C (5) -C (6) -H (6) | 120.1       |
| C (1) -C (6) -H (6) | 120.1       |

|                      |           |
|----------------------|-----------|
| N(1)-C(7)-C(9)       | 110.0(2)  |
| N(1)-C(7)-C(8)       | 109.1(2)  |
| C(9)-C(7)-C(8)       | 110.9(3)  |
| N(1)-C(7)-H(7)       | 109.0     |
| C(9)-C(7)-H(7)       | 109.0     |
| C(8)-C(7)-H(7)       | 109.0     |
| C(7)-C(8)-H(8A)      | 109.5     |
| C(7)-C(8)-H(8B)      | 109.5     |
| H(8A)-C(8)-H(8B)     | 109.5     |
| C(7)-C(8)-H(8C)      | 109.5     |
| H(8A)-C(8)-H(8C)     | 109.5     |
| H(8B)-C(8)-H(8C)     | 109.5     |
| C(7)-C(9)-H(9A)      | 109.5     |
| C(7)-C(9)-H(9B)      | 109.5     |
| H(9A)-C(9)-H(9B)     | 109.5     |
| C(7)-C(9)-H(9C)      | 109.5     |
| H(9A)-C(9)-H(9C)     | 109.5     |
| H(9B)-C(9)-H(9C)     | 109.5     |
| C(10')-N(2)-S(1)     | 126.0(9)  |
| C(10)-N(2)-S(1)      | 123.7(7)  |
| C(10')-N(2)-H(2A)    | 119(2)    |
| C(10)-N(2)-H(2A)     | 114.6(19) |
| S(1)-N(2)-H(2A)      | 112.5(17) |
| N(2)-C(10)-C(12)     | 109.3(9)  |
| N(2)-C(10)-C(11)     | 109.2(9)  |
| C(12)-C(10)-C(11)    | 112.7(9)  |
| N(2)-C(10)-H(10)     | 108.5     |
| C(12)-C(10)-H(10)    | 108.5     |
| C(11)-C(10)-H(10)    | 108.5     |
| C(10)-C(11)-H(11A)   | 109.5     |
| C(10)-C(11)-H(11B)   | 109.5     |
| H(11A)-C(11)-H(11B)  | 109.5     |
| C(10)-C(11)-H(11C)   | 109.5     |
| H(11A)-C(11)-H(11C)  | 109.5     |
| H(11B)-C(11)-H(11C)  | 109.5     |
| C(10)-C(12)-H(12A)   | 109.5     |
| C(10)-C(12)-H(12B)   | 109.5     |
| H(12A)-C(12)-H(12B)  | 109.5     |
| C(10)-C(12)-H(12C)   | 109.5     |
| H(12A)-C(12)-H(12C)  | 109.5     |
| H(12B)-C(12)-H(12C)  | 109.5     |
| N(2)-C(10')-C(11')   | 111.8(11) |
| N(2)-C(10')-C(12')   | 110.1(11) |
| C(11')-C(10')-C(12') | 112.0(11) |
| N(2)-C(10')-H(10')   | 107.6     |
| C(11')-C(10')-H(10') | 107.6     |
| C(12')-C(10')-H(10') | 107.6     |
| C(10')-C(11')-H(11D) | 109.5     |
| C(10')-C(11')-H(11E) | 109.5     |
| H(11D)-C(11')-H(11E) | 109.5     |
| C(10')-C(11')-H(11F) | 109.5     |
| H(11D)-C(11')-H(11F) | 109.5     |
| H(11E)-C(11')-H(11F) | 109.5     |
| C(10')-C(12')-H(12D) | 109.5     |
| C(10')-C(12')-H(12E) | 109.5     |
| H(12D)-C(12')-H(12E) | 109.5     |
| C(10')-C(12')-H(12F) | 109.5     |
| H(12D)-C(12')-H(12F) | 109.5     |

|                      |            |
|----------------------|------------|
| H(12E)-C(12')-H(12F) | 109.5      |
| C(14)-C(13)-C(18)    | 119.6(2)   |
| C(14)-C(13)-S(2)     | 120.38(17) |
| C(18)-C(13)-S(2)     | 119.84(19) |
| C(15)-C(14)-C(13)    | 120.2(2)   |
| C(15)-C(14)-H(14)    | 119.9      |
| C(13)-C(14)-H(14)    | 119.9      |
| C(16)-C(15)-C(14)    | 120.0(2)   |
| C(16)-C(15)-H(15)    | 120.0      |
| C(14)-C(15)-H(15)    | 120.0      |
| C(17)-C(16)-C(15)    | 119.9(3)   |
| C(17)-C(16)-H(16)    | 120.0      |
| C(15)-C(16)-H(16)    | 120.0      |
| C(16)-C(17)-C(18)    | 120.8(2)   |
| C(16)-C(17)-H(17)    | 119.6      |
| C(18)-C(17)-H(17)    | 119.6      |
| C(17)-C(18)-C(13)    | 119.4(2)   |
| C(17)-C(18)-H(18)    | 120.3      |
| C(13)-C(18)-H(18)    | 120.3      |
| N(3)-C(19)-C(20)     | 110.6(2)   |
| N(3)-C(19)-C(21)     | 109.2(2)   |
| C(20)-C(19)-C(21)    | 113.4(3)   |
| N(3)-C(19)-H(19)     | 107.8      |
| C(20)-C(19)-H(19)    | 107.8      |
| C(21)-C(19)-H(19)    | 107.8      |
| C(19)-C(20)-H(20A)   | 109.5      |
| C(19)-C(20)-H(20B)   | 109.5      |
| H(20A)-C(20)-H(20B)  | 109.5      |
| C(19)-C(20)-H(20C)   | 109.5      |
| H(20A)-C(20)-H(20C)  | 109.5      |
| H(20B)-C(20)-H(20C)  | 109.5      |
| C(19)-C(21)-H(21A)   | 109.5      |
| C(19)-C(21)-H(21B)   | 109.5      |
| H(21A)-C(21)-H(21B)  | 109.5      |
| C(19)-C(21)-H(21C)   | 109.5      |
| H(21A)-C(21)-H(21C)  | 109.5      |
| H(21B)-C(21)-H(21C)  | 109.5      |
| C(7)-N(1)-S(1)       | 117.61(17) |
| C(19)-N(3)-S(2)      | 121.24(15) |
| C(19)-N(3)-H(3A)     | 116.8(17)  |
| S(2)-N(3)-H(3A)      | 111.0(18)  |
| C(22')-N(4)-S(2)     | 118.5(5)   |
| C(22)-N(4)-S(2)      | 120.4(11)  |
| N(4)-C(22)-C(23)     | 108.5(14)  |
| N(4)-C(22)-C(24)     | 109.4(13)  |
| C(23)-C(22)-C(24)    | 109.1(15)  |
| N(4)-C(22)-H(22)     | 110.0      |
| C(23)-C(22)-H(22)    | 110.0      |
| C(24)-C(22)-H(22)    | 109.9      |
| C(22)-C(23)-H(23A)   | 109.5      |
| C(22)-C(23)-H(23B)   | 109.5      |
| H(23A)-C(23)-H(23B)  | 109.5      |
| C(22)-C(23)-H(23C)   | 109.5      |
| H(23A)-C(23)-H(23C)  | 109.5      |
| H(23B)-C(23)-H(23C)  | 109.5      |
| C(22)-C(24)-H(24A)   | 109.5      |
| C(22)-C(24)-H(24B)   | 109.5      |
| H(24A)-C(24)-H(24B)  | 109.5      |



|                           |             |
|---------------------------|-------------|
| C (22) -C (24) -H (24C)   | 109.5       |
| H (24A) -C (24) -H (24C)  | 109.5       |
| H (24B) -C (24) -H (24C)  | 109.5       |
| N (4) -C (22') -C (23')   | 108.1 (8)   |
| N (4) -C (22') -C (24')   | 110.2 (6)   |
| C (23') -C (22') -C (24') | 111.1 (8)   |
| N (4) -C (22') -H (22')   | 109.1       |
| C (23') -C (22') -H (22') | 109.1       |
| C (24') -C (22') -H (22') | 109.1       |
| C (22') -C (23') -H (23D) | 109.5       |
| C (22') -C (23') -H (23E) | 109.5       |
| H (23D) -C (23') -H (23E) | 109.5       |
| C (22') -C (23') -H (23F) | 109.5       |
| H (23D) -C (23') -H (23F) | 109.5       |
| H (23E) -C (23') -H (23F) | 109.5       |
| C (22') -C (24') -H (24D) | 109.5       |
| C (22') -C (24') -H (24E) | 109.5       |
| H (24D) -C (24') -H (24E) | 109.5       |
| C (22') -C (24') -H (24F) | 109.5       |
| H (24D) -C (24') -H (24F) | 109.5       |
| H (24E) -C (24') -H (24F) | 109.5       |
| O (1) -S (1) -N (1)       | 123.44 (11) |
| O (1) -S (1) -N (2)       | 103.97 (10) |
| N (1) -S (1) -N (2)       | 109.70 (11) |
| O (1) -S (1) -C (1)       | 106.41 (11) |
| N (1) -S (1) -C (1)       | 104.08 (11) |
| N (2) -S (1) -C (1)       | 108.64 (11) |
| O (2) -S (2) -N (4)       | 123.29 (10) |
| O (2) -S (2) -N (3)       | 104.62 (10) |
| N (4) -S (2) -N (3)       | 109.86 (11) |
| O (2) -S (2) -C (13)      | 106.65 (10) |
| N (4) -S (2) -C (13)      | 103.78 (11) |
| N (3) -S (2) -C (13)      | 107.90 (11) |

---

Symmetry transformations used to generate equivalent atoms:

Table 4. Anisotropic displacement parameters ( $\text{Å}^2 \times 10^3$ ) for n1265ligand\_a.

The anisotropic displacement factor exponent takes the form:  
 $-2 \pi^2 [ h^2 a^{*2} U_{11} + \dots + 2 h k a^* b^* U_{12} ]$

|         | U11    | U22     | U33     | U23     | U13     |   |
|---------|--------|---------|---------|---------|---------|---|
| C (1)   | 21 (1) | 39 (2)  | 47 (1)  | -16 (1) | 0 (1)   | - |
| 2 (1)   |        |         |         |         |         |   |
| C (2)   | 32 (1) | 40 (2)  | 47 (2)  | -13 (1) | 2 (1)   |   |
| 2 (1)   |        |         |         |         |         |   |
| C (3)   | 39 (1) | 47 (2)  | 49 (2)  | -7 (1)  | 1 (1)   | - |
| 1 (1)   |        |         |         |         |         |   |
| C (4)   | 38 (1) | 56 (2)  | 47 (2)  | -21 (1) | 6 (1)   | - |
| 11 (1)  |        |         |         |         |         |   |
| C (5)   | 42 (2) | 60 (2)  | 67 (2)  | -35 (2) | 7 (1)   |   |
| 1 (1)   |        |         |         |         |         |   |
| C (6)   | 39 (1) | 49 (2)  | 62 (2)  | -20 (2) | -1 (1)  |   |
| 10 (1)  |        |         |         |         |         |   |
| C (7)   | 44 (1) | 45 (2)  | 41 (1)  | -10 (1) | -4 (1)  |   |
| 2 (1)   |        |         |         |         |         |   |
| C (8)   | 55 (2) | 123 (4) | 76 (2)  | -56 (2) | 9 (2)   | - |
| 25 (2)  |        |         |         |         |         |   |
| C (9)   | 49 (2) | 82 (2)  | 59 (2)  | -32 (2) | 1 (1)   | - |
| 1 (2)   |        |         |         |         |         |   |
| N (2)   | 17 (1) | 33 (1)  | 62 (1)  | -6 (1)  | -2 (1)  |   |
| 1 (1)   |        |         |         |         |         |   |
| C (10)  | 30 (4) | 31 (4)  | 96 (6)  | -16 (3) | 13 (4)  | - |
| 2 (3)   |        |         |         |         |         |   |
| C (11)  | 47 (3) | 52 (5)  | 135 (8) | -47 (5) | -11 (5) | - |
| 5 (4)   |        |         |         |         |         |   |
| C (12)  | 71 (6) | 44 (5)  | 121 (7) | 1 (5)   | 17 (5)  | - |
| 7 (4)   |        |         |         |         |         |   |
| C (10') | 27 (4) | 36 (4)  | 101 (7) | -17 (4) | 7 (5)   |   |
| 1 (3)   |        |         |         |         |         |   |
| C (11') | 48 (4) | 54 (6)  | 133 (9) | -39 (6) | 9 (6)   | - |
| 6 (4)   |        |         |         |         |         |   |
| C (12') | 66 (7) | 45 (7)  | 104 (7) | 18 (5)  | 8 (5)   |   |
| 2 (5)   |        |         |         |         |         |   |
| C (13)  | 25 (1) | 25 (1)  | 45 (1)  | -11 (1) | 2 (1)   |   |
| 2 (1)   |        |         |         |         |         |   |
| C (14)  | 33 (1) | 47 (2)  | 45 (2)  | -1 (1)  | -4 (1)  | - |
| 11 (1)  |        |         |         |         |         |   |
| C (15)  | 43 (1) | 50 (2)  | 47 (2)  | -5 (1)  | -7 (1)  | - |
| 11 (1)  |        |         |         |         |         |   |
| C (16)  | 52 (2) | 45 (2)  | 44 (2)  | -10 (1) | 7 (1)   | - |
| 7 (1)   |        |         |         |         |         |   |
| C (17)  | 53 (2) | 70 (2)  | 58 (2)  | -19 (2) | 22 (1)  | - |
| 29 (2)  |        |         |         |         |         |   |
| C (18)  | 37 (1) | 62 (2)  | 56 (2)  | -25 (2) | 10 (1)  | - |
| 19 (1)  |        |         |         |         |         |   |

|        |         |        |         |         |         |         |   |
|--------|---------|--------|---------|---------|---------|---------|---|
| 2 (1)  | C (19)  | 29 (1) | 34 (2)  | 63 (2)  | -15 (1) | 5 (1)   | - |
| 6 (2)  | C (20)  | 65 (2) | 41 (2)  | 103 (3) | 2 (2)   | -14 (2) |   |
| 13 (2) | C (21)  | 79 (2) | 61 (2)  | 87 (2)  | -40 (2) | 12 (2)  | - |
| 2 (1)  | N (1)   | 41 (1) | 33 (1)  | 40 (1)  | -12 (1) | -1 (1)  |   |
| 0 (1)  | N (3)   | 19 (1) | 33 (1)  | 52 (1)  | -17 (1) | -1 (1)  |   |
| 2 (1)  | N (4)   | 35 (1) | 31 (1)  | 38 (1)  | -8 (1)  | -4 (1)  |   |
| 2 (4)  | C (22)  | 42 (5) | 49 (6)  | 40 (5)  | -6 (5)  | -5 (4)  | - |
| 5 (5)  | C (23)  | 37 (4) | 64 (9)  | 47 (6)  | -11 (6) | 2 (4)   |   |
| 19 (5) | C (24)  | 43 (5) | 78 (8)  | 72 (7)  | 28 (6)  | 8 (5)   |   |
| 5 (2)  | C (22') | 45 (3) | 42 (3)  | 35 (3)  | -9 (2)  | -6 (2)  |   |
| 22 (4) | C (23') | 71 (4) | 76 (6)  | 45 (4)  | 5 (4)   | 1 (3)   | - |
| 13 (4) | C (24') | 66 (3) | 107 (7) | 54 (4)  | 6 (4)   | -14 (3) |   |
| 0 (1)  | O (1)   | 20 (1) | 46 (1)  | 63 (1)  | -5 (1)  | -10 (1) |   |
| 3 (1)  | O (2)   | 19 (1) | 57 (1)  | 59 (1)  | -25 (1) | -8 (1)  |   |
| 0 (1)  | S (1)   | 21 (1) | 34 (1)  | 47 (1)  | -9 (1)  | -4 (1)  |   |
| 2 (1)  | S (2)   | 20 (1) | 35 (1)  | 44 (1)  | -14 (1) | -3 (1)  |   |

---

## Crystal data and structure refinement of compound 2

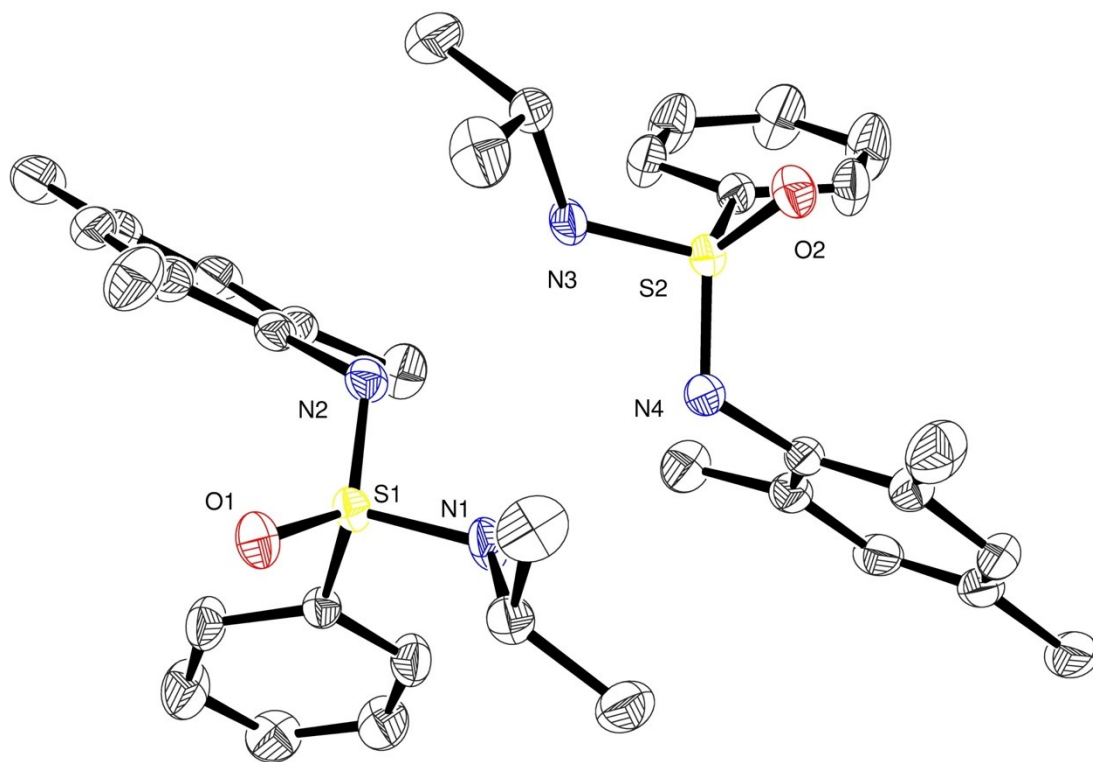

Figure 2 : Asymmetric Unit

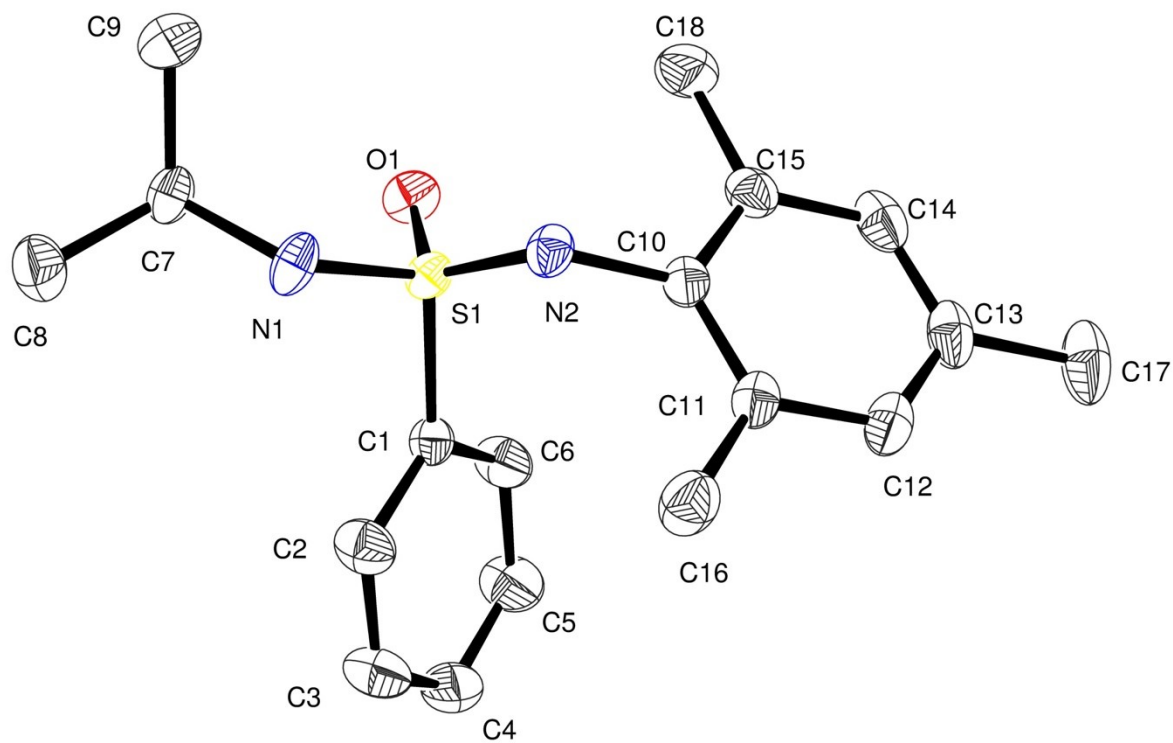

Figure 2 : Molecule

Table 1. Crystal data and structure refinement for NL267.

|                             |                                                    |
|-----------------------------|----------------------------------------------------|
| Identification code         | NL267                                              |
| Empirical formula           | C <sub>18</sub> H <sub>24</sub> N <sub>2</sub> O S |
| Formula weight              | 316.45                                             |
| Temperature                 | 193(2) K                                           |
| Wavelength                  | 0.71073 Å                                          |
| Crystal system, space group | Triclinic, P -1                                    |
| Unit cell dimensions        | a = 11.989(3) Å    alpha = 64.437(9)               |
| deg.                        |                                                    |

|                                   |                                       |                         |
|-----------------------------------|---------------------------------------|-------------------------|
|                                   | b = 12.149(3) Å                       | beta = 88.604(8)        |
| deg.                              |                                       |                         |
|                                   | c = 13.386(3) Å                       | gamma = 83.874(13)      |
| deg.                              |                                       |                         |
| Volume                            | 1748.5(8) Å <sup>3</sup>              |                         |
| Z, Calculated density             | 4,                                    | 1.202 Mg/m <sup>3</sup> |
| Absorption coefficient            | 0.189 mm <sup>-1</sup>                |                         |
| Max. and min. transmission        | 0.7461 and 0.7248                     |                         |
| F(000)                            | 680                                   |                         |
| Crystal size                      | 0.480 x 0.460 x 0.120 mm              |                         |
| Theta range for data collection   | 3.072 to 30.511 deg.                  |                         |
| Limiting indices                  | -17<=h<=17, -17<=k<=17,<br>-19<=l<=19 |                         |
| Reflections collected / unique    | 81609 / 10619 [R(int) = 0.0259]       |                         |
| Completeness to theta = 25.242    | 99.6 %                                |                         |
| Refinement method                 | Full-matrix least-squares on          |                         |
| F <sup>2</sup>                    |                                       |                         |
| Data / restraints / parameters    | 10619 / 0 / 415                       |                         |
| Goodness-of-fit on F <sup>2</sup> | 1.042                                 |                         |
| Final R indices [I>2sigma(I)]     | R1 = 0.0375, wR2 = 0.0989             |                         |
| R indices (all data)              | R1 = 0.0466, wR2 = 0.1061             |                         |
| Largest diff. peak and hole       | 0.370 and -0.383 e.Å <sup>-3</sup>    |                         |

Table 2. Atomic coordinates ( $\times 10^4$ ) and equivalent isotropic displacement parameters ( $\text{\AA}^2 \times 10^3$ ) for nl267\_a. U(eq) is defined as one third of the trace of the orthogonalized Uij tensor.

|        | x        | y        | z         | U (eq) |
|--------|----------|----------|-----------|--------|
| C (1)  | 1189 (1) | 4852 (1) | 8107 (1)  | 23 (1) |
| C (2)  | 1366 (1) | 5645 (1) | 7015 (1)  | 34 (1) |
| C (3)  | 1488 (1) | 6866 (1) | 6749 (1)  | 41 (1) |
| C (4)  | 1426 (1) | 7293 (1) | 7555 (1)  | 40 (1) |
| C (5)  | 1228 (1) | 6502 (1) | 8639 (1)  | 44 (1) |
| C (6)  | 1109 (1) | 5274 (1) | 8922 (1)  | 34 (1) |
| C (7)  | -371 (1) | 2946 (1) | 7214 (1)  | 26 (1) |
| C (8)  | -648 (1) | 3620 (1) | 5983 (1)  | 38 (1) |
| C (9)  | -484 (1) | 1581 (1) | 7660 (1)  | 41 (1) |
| C (10) | 2950 (1) | 2660 (1) | 9668 (1)  | 24 (1) |
| C (11) | 3874 (1) | 3350 (1) | 9324 (1)  | 27 (1) |
| C (12) | 4569 (1) | 3401 (1) | 10124 (1) | 32 (1) |
| C (13) | 4393 (1) | 2766 (1) | 11250 (1) | 34 (1) |
| C (14) | 3497 (1) | 2062 (1) | 11572 (1) | 35 (1) |
| C (15) | 2760 (1) | 2000 (1) | 10807 (1) | 29 (1) |
| C (16) | 4138 (1) | 4010 (1) | 8120 (1)  | 38 (1) |
| C (17) | 5146 (1) | 2842 (2) | 12105 (1) | 49 (1) |
| C (18) | 1799 (1) | 1225 (1) | 11233 (1) | 43 (1) |
| C (19) | 4498 (1) | 1129 (1) | 6526 (1)  | 23 (1) |
| C (20) | 5171 (1) | 1370 (1) | 7222 (1)  | 32 (1) |
| C (21) | 6269 (1) | 1613 (2) | 6933 (1)  | 42 (1) |
| C (22) | 6689 (1) | 1605 (2) | 5967 (1)  | 48 (1) |
| C (23) | 6016 (1) | 1372 (2) | 5267 (1)  | 48 (1) |
| C (25) | 4912 (1) | 1136 (1) | 5543 (1)  | 34 (1) |
| C (26) | 2960 (1) | -671 (1) | 8997 (1)  | 27 (1) |
| C (27) | 1785 (1) | -953 (1) | 9416 (1)  | 42 (1) |
| C (28) | 3766 (1) | -803 (1) | 9914 (1)  | 45 (1) |
| C (29) | 2384 (1) | 2798 (1) | 5049 (1)  | 24 (1) |
| C (30) | 2944 (1) | 3861 (1) | 4635 (1)  | 27 (1) |
| C (31) | 2939 (1) | 4585 (1) | 3491 (1)  | 33 (1) |
| C (32) | 2382 (1) | 4297 (1) | 2754 (1)  | 36 (1) |
| C (33) | 1813 (1) | 3260 (1) | 3182 (1)  | 37 (1) |
| C (34) | 1801 (1) | 2492 (1) | 4317 (1)  | 30 (1) |
| C (35) | 3528 (1) | 4248 (1) | 5394 (1)  | 38 (1) |
| C (36) | 2379 (1) | 5101 (2) | 1520 (1)  | 50 (1) |
| C (37) | 1163 (1) | 1377 (1) | 4720 (1)  | 44 (1) |
| N (1)  | 784 (1)  | 3141 (1) | 7412 (1)  | 27 (1) |
| N (2)  | 2275 (1) | 2546 (1) | 8845 (1)  | 25 (1) |
| N (3)  | 2908 (1) | 592 (1)  | 8108 (1)  | 27 (1) |
| N (4)  | 2318 (1) | 2098 (1) | 6229 (1)  | 24 (1) |
| O (1)  | 187 (1)  | 2959 (1) | 9278 (1)  | 30 (1) |
| O (2)  | 2909 (1) | -186 (1) | 6665 (1)  | 29 (1) |
| S (1)  | 1106 (1) | 3261 (1) | 8514 (1)  | 22 (1) |
| S (2)  | 3064 (1) | 889 (1)  | 6834 (1)  | 21 (1) |

---



Table 3. Bond lengths [Å] and angles [deg] for n1267\_a.

---

|              |            |
|--------------|------------|
| C(1)-C(2)    | 1.3870(16) |
| C(1)-C(6)    | 1.3897(15) |
| C(1)-S(1)    | 1.7810(12) |
| C(2)-C(3)    | 1.3910(19) |
| C(2)-H(2)    | 0.9500     |
| C(3)-C(4)    | 1.383(2)   |
| C(3)-H(3)    | 0.9500     |
| C(4)-C(5)    | 1.383(2)   |
| C(4)-H(4)    | 0.9500     |
| C(5)-C(6)    | 1.3948(18) |
| C(5)-H(5)    | 0.9500     |
| C(6)-H(6)    | 0.9500     |
| C(7)-N(1)    | 1.4790(14) |
| C(7)-C(8)    | 1.5171(17) |
| C(7)-C(9)    | 1.5213(18) |
| C(7)-H(7)    | 1.0000     |
| C(8)-H(8A)   | 0.9800     |
| C(8)-H(8B)   | 0.9800     |
| C(8)-H(8C)   | 0.9800     |
| C(9)-H(9A)   | 0.9800     |
| C(9)-H(9B)   | 0.9800     |
| C(9)-H(9C)   | 0.9800     |
| C(10)-C(11)  | 1.4077(16) |
| C(10)-C(15)  | 1.4089(16) |
| C(10)-N(2)   | 1.4444(13) |
| C(11)-C(12)  | 1.3999(15) |
| C(11)-C(16)  | 1.5016(18) |
| C(12)-C(13)  | 1.3875(19) |
| C(12)-H(12)  | 0.9500     |
| C(13)-C(14)  | 1.388(2)   |
| C(13)-C(17)  | 1.5145(17) |
| C(14)-C(15)  | 1.3996(17) |
| C(14)-H(14)  | 0.9500     |
| C(15)-C(18)  | 1.5090(19) |
| C(16)-H(16A) | 0.9800     |
| C(16)-H(16B) | 0.9800     |
| C(16)-H(16C) | 0.9800     |
| C(17)-H(17A) | 0.9800     |
| C(17)-H(17B) | 0.9800     |
| C(17)-H(17C) | 0.9800     |
| C(18)-H(18A) | 0.9800     |
| C(18)-H(18B) | 0.9800     |
| C(18)-H(18C) | 0.9800     |
| C(19)-C(20)  | 1.3883(15) |
| C(19)-C(25)  | 1.3920(15) |
| C(19)-S(2)   | 1.7829(12) |
| C(20)-C(21)  | 1.3896(18) |
| C(20)-H(20)  | 0.9500     |
| C(21)-C(22)  | 1.381(2)   |
| C(21)-H(21)  | 0.9500     |
| C(22)-C(23)  | 1.387(2)   |
| C(22)-H(22)  | 0.9500     |
| C(23)-C(25)  | 1.3904(18) |
| C(23)-H(23)  | 0.9500     |

|                     |             |
|---------------------|-------------|
| C (25) -H (25)      | 0.9500      |
| C (26) -N (3)       | 1.4773 (14) |
| C (26) -C (27)      | 1.5211 (18) |
| C (26) -C (28)      | 1.5224 (18) |
| C (26) -H (26)      | 1.0000      |
| C (27) -H (27A)     | 0.9800      |
| C (27) -H (27B)     | 0.9800      |
| C (27) -H (27C)     | 0.9800      |
| C (28) -H (28A)     | 0.9800      |
| C (28) -H (28B)     | 0.9800      |
| C (28) -H (28C)     | 0.9800      |
| C (29) -C (30)      | 1.4059 (16) |
| C (29) -C (34)      | 1.4113 (16) |
| C (29) -N (4)       | 1.4400 (13) |
| C (30) -C (31)      | 1.3984 (16) |
| C (30) -C (35)      | 1.5030 (17) |
| C (31) -C (32)      | 1.386 (2)   |
| C (31) -H (31)      | 0.9500      |
| C (32) -C (33)      | 1.388 (2)   |
| C (32) -C (36)      | 1.5132 (17) |
| C (33) -C (34)      | 1.3989 (17) |
| C (33) -H (33)      | 0.9500      |
| C (34) -C (37)      | 1.5099 (19) |
| C (35) -H (35A)     | 0.9800      |
| C (35) -H (35B)     | 0.9800      |
| C (35) -H (35C)     | 0.9800      |
| C (36) -H (36A)     | 0.9800      |
| C (36) -H (36B)     | 0.9800      |
| C (36) -H (36C)     | 0.9800      |
| C (37) -H (37A)     | 0.9800      |
| C (37) -H (37B)     | 0.9800      |
| C (37) -H (37C)     | 0.9800      |
| N (1) -S (1)        | 1.6032 (10) |
| N (1) -H (1A)       | 0.855 (18)  |
| N (2) -S (1)        | 1.5343 (10) |
| N (3) -S (2)        | 1.5938 (10) |
| N (3) -H (3A)       | 0.877 (17)  |
| N (4) -S (2)        | 1.5311 (10) |
| O (1) -S (1)        | 1.4486 (9)  |
| O (2) -S (2)        | 1.4492 (9)  |
|                     |             |
| C (2) -C (1) -C (6) | 120.53 (11) |
| C (2) -C (1) -S (1) | 121.31 (8)  |
| C (6) -C (1) -S (1) | 118.12 (9)  |
| C (1) -C (2) -C (3) | 119.16 (11) |
| C (1) -C (2) -H (2) | 120.4       |
| C (3) -C (2) -H (2) | 120.4       |
| C (4) -C (3) -C (2) | 120.82 (12) |
| C (4) -C (3) -H (3) | 119.6       |
| C (2) -C (3) -H (3) | 119.6       |
| C (5) -C (4) -C (3) | 119.71 (12) |
| C (5) -C (4) -H (4) | 120.1       |
| C (3) -C (4) -H (4) | 120.1       |
| C (4) -C (5) -C (6) | 120.25 (12) |
| C (4) -C (5) -H (5) | 119.9       |
| C (6) -C (5) -H (5) | 119.9       |
| C (1) -C (6) -C (5) | 119.49 (11) |
| C (1) -C (6) -H (6) | 120.3       |

|                          |             |
|--------------------------|-------------|
| C (5) -C (6) -H (6)      | 120.3       |
| N (1) -C (7) -C (8)      | 108.80 (10) |
| N (1) -C (7) -C (9)      | 110.28 (10) |
| C (8) -C (7) -C (9)      | 111.84 (10) |
| N (1) -C (7) -H (7)      | 108.6       |
| C (8) -C (7) -H (7)      | 108.6       |
| C (9) -C (7) -H (7)      | 108.6       |
| C (7) -C (8) -H (8A)     | 109.5       |
| C (7) -C (8) -H (8B)     | 109.5       |
| H (8A) -C (8) -H (8B)    | 109.5       |
| C (7) -C (8) -H (8C)     | 109.5       |
| H (8A) -C (8) -H (8C)    | 109.5       |
| H (8B) -C (8) -H (8C)    | 109.5       |
| C (7) -C (9) -H (9A)     | 109.5       |
| C (7) -C (9) -H (9B)     | 109.5       |
| H (9A) -C (9) -H (9B)    | 109.5       |
| C (7) -C (9) -H (9C)     | 109.5       |
| H (9A) -C (9) -H (9C)    | 109.5       |
| H (9B) -C (9) -H (9C)    | 109.5       |
| C (11) -C (10) -C (15)   | 119.87 (10) |
| C (11) -C (10) -N (2)    | 118.97 (10) |
| C (15) -C (10) -N (2)    | 120.90 (10) |
| C (12) -C (11) -C (10)   | 119.09 (11) |
| C (12) -C (11) -C (16)   | 119.57 (11) |
| C (10) -C (11) -C (16)   | 121.33 (10) |
| C (13) -C (12) -C (11)   | 121.99 (12) |
| C (13) -C (12) -H (12)   | 119.0       |
| C (11) -C (12) -H (12)   | 119.0       |
| C (12) -C (13) -C (14)   | 117.94 (11) |
| C (12) -C (13) -C (17)   | 121.34 (13) |
| C (14) -C (13) -C (17)   | 120.71 (13) |
| C (13) -C (14) -C (15)   | 122.46 (12) |
| C (13) -C (14) -H (14)   | 118.8       |
| C (15) -C (14) -H (14)   | 118.8       |
| C (14) -C (15) -C (10)   | 118.61 (11) |
| C (14) -C (15) -C (18)   | 118.79 (11) |
| C (10) -C (15) -C (18)   | 122.60 (11) |
| C (11) -C (16) -H (16A)  | 109.5       |
| C (11) -C (16) -H (16B)  | 109.5       |
| H (16A) -C (16) -H (16B) | 109.5       |
| C (11) -C (16) -H (16C)  | 109.5       |
| H (16A) -C (16) -H (16C) | 109.5       |
| H (16B) -C (16) -H (16C) | 109.5       |
| C (13) -C (17) -H (17A)  | 109.5       |
| C (13) -C (17) -H (17B)  | 109.5       |
| H (17A) -C (17) -H (17B) | 109.5       |
| C (13) -C (17) -H (17C)  | 109.5       |
| H (17A) -C (17) -H (17C) | 109.5       |
| H (17B) -C (17) -H (17C) | 109.5       |
| C (15) -C (18) -H (18A)  | 109.5       |
| C (15) -C (18) -H (18B)  | 109.5       |
| H (18A) -C (18) -H (18B) | 109.5       |
| C (15) -C (18) -H (18C)  | 109.5       |
| H (18A) -C (18) -H (18C) | 109.5       |
| H (18B) -C (18) -H (18C) | 109.5       |
| C (20) -C (19) -C (25)   | 120.59 (10) |
| C (20) -C (19) -S (2)    | 120.67 (8)  |
| C (25) -C (19) -S (2)    | 118.65 (8)  |

|                          |             |
|--------------------------|-------------|
| C (19) -C (20) -C (21)   | 119.43 (11) |
| C (19) -C (20) -H (20)   | 120.3       |
| C (21) -C (20) -H (20)   | 120.3       |
| C (22) -C (21) -C (20)   | 120.20 (12) |
| C (22) -C (21) -H (21)   | 119.9       |
| C (20) -C (21) -H (21)   | 119.9       |
| C (21) -C (22) -C (23)   | 120.42 (12) |
| C (21) -C (22) -H (22)   | 119.8       |
| C (23) -C (22) -H (22)   | 119.8       |
| C (22) -C (23) -C (25)   | 119.90 (12) |
| C (22) -C (23) -H (23)   | 120.1       |
| C (25) -C (23) -H (23)   | 120.1       |
| C (23) -C (25) -C (19)   | 119.45 (11) |
| C (23) -C (25) -H (25)   | 120.3       |
| C (19) -C (25) -H (25)   | 120.3       |
| N (3) -C (26) -C (27)    | 109.43 (10) |
| N (3) -C (26) -C (28)    | 109.29 (10) |
| C (27) -C (26) -C (28)   | 112.32 (11) |
| N (3) -C (26) -H (26)    | 108.6       |
| C (27) -C (26) -H (26)   | 108.6       |
| C (28) -C (26) -H (26)   | 108.6       |
| C (26) -C (27) -H (27A)  | 109.5       |
| C (26) -C (27) -H (27B)  | 109.5       |
| H (27A) -C (27) -H (27B) | 109.5       |
| C (26) -C (27) -H (27C)  | 109.5       |
| H (27A) -C (27) -H (27C) | 109.5       |
| H (27B) -C (27) -H (27C) | 109.5       |
| C (26) -C (28) -H (28A)  | 109.5       |
| C (26) -C (28) -H (28B)  | 109.5       |
| H (28A) -C (28) -H (28B) | 109.5       |
| C (26) -C (28) -H (28C)  | 109.5       |
| H (28A) -C (28) -H (28C) | 109.5       |
| H (28B) -C (28) -H (28C) | 109.5       |
| C (30) -C (29) -C (34)   | 120.07 (10) |
| C (30) -C (29) -N (4)    | 119.18 (10) |
| C (34) -C (29) -N (4)    | 120.45 (10) |
| C (31) -C (30) -C (29)   | 119.01 (11) |
| C (31) -C (30) -C (35)   | 119.43 (11) |
| C (29) -C (30) -C (35)   | 121.55 (10) |
| C (32) -C (31) -C (30)   | 122.02 (12) |
| C (32) -C (31) -H (31)   | 119.0       |
| C (30) -C (31) -H (31)   | 119.0       |
| C (31) -C (32) -C (33)   | 118.00 (11) |
| C (31) -C (32) -C (36)   | 121.10 (14) |
| C (33) -C (32) -C (36)   | 120.90 (13) |
| C (32) -C (33) -C (34)   | 122.55 (12) |
| C (32) -C (33) -H (33)   | 118.7       |
| C (34) -C (33) -H (33)   | 118.7       |
| C (33) -C (34) -C (29)   | 118.32 (12) |
| C (33) -C (34) -C (37)   | 119.48 (11) |
| C (29) -C (34) -C (37)   | 122.19 (11) |
| C (30) -C (35) -H (35A)  | 109.5       |
| C (30) -C (35) -H (35B)  | 109.5       |
| H (35A) -C (35) -H (35B) | 109.5       |
| C (30) -C (35) -H (35C)  | 109.5       |
| H (35A) -C (35) -H (35C) | 109.5       |
| H (35B) -C (35) -H (35C) | 109.5       |
| C (32) -C (36) -H (36A)  | 109.5       |

|                          |            |
|--------------------------|------------|
| C (32) -C (36) -H (36B)  | 109.5      |
| H (36A) -C (36) -H (36B) | 109.5      |
| C (32) -C (36) -H (36C)  | 109.5      |
| H (36A) -C (36) -H (36C) | 109.5      |
| H (36B) -C (36) -H (36C) | 109.5      |
| C (34) -C (37) -H (37A)  | 109.5      |
| C (34) -C (37) -H (37B)  | 109.5      |
| H (37A) -C (37) -H (37B) | 109.5      |
| C (34) -C (37) -H (37C)  | 109.5      |
| H (37A) -C (37) -H (37C) | 109.5      |
| H (37B) -C (37) -H (37C) | 109.5      |
| C (7) -N (1) -S (1)      | 120.73 (8) |
| C (7) -N (1) -H (1A)     | 117.7 (11) |
| S (1) -N (1) -H (1A)     | 114.6 (11) |
| C (10) -N (2) -S (1)     | 120.03 (7) |
| C (26) -N (3) -S (2)     | 123.04 (8) |
| C (26) -N (3) -H (3A)    | 119.4 (11) |
| S (2) -N (3) -H (3A)     | 117.3 (11) |
| C (29) -N (4) -S (2)     | 120.61 (7) |
| O (1) -S (1) -N (2)      | 121.31 (6) |
| O (1) -S (1) -N (1)      | 110.08 (5) |
| N (2) -S (1) -N (1)      | 103.75 (5) |
| O (1) -S (1) -C (1)      | 104.62 (5) |
| N (2) -S (1) -C (1)      | 110.21 (5) |
| N (1) -S (1) -C (1)      | 106.06 (5) |
| O (2) -S (2) -N (4)      | 121.32 (5) |
| O (2) -S (2) -N (3)      | 109.71 (5) |
| N (4) -S (2) -N (3)      | 103.39 (5) |
| O (2) -S (2) -C (19)     | 104.71 (5) |
| N (4) -S (2) -C (19)     | 109.73 (5) |
| N (3) -S (2) -C (19)     | 107.40 (5) |

---

Symmetry transformations used to generate equivalent atoms:

Table 4. Anisotropic displacement parameters ( $\text{\AA}^2 \times 10^3$ ) for n1267\_a.

The anisotropic displacement factor exponent takes the form:  
 $-2 \pi^2 [ h^2 a^{*2} U_{11} + \dots + 2 h k a^* b^* U_{12} ]$

| U12    | U11    | U22    | U33    | U23     | U13     |   |
|--------|--------|--------|--------|---------|---------|---|
| C (1)  | 23 (1) | 24 (1) | 22 (1) | -12 (1) | 0 (1)   | - |
| 2 (1)  |        |        |        |         |         |   |
| C (2)  | 44 (1) | 34 (1) | 24 (1) | -13 (1) | 6 (1)   | - |
| 5 (1)  |        |        |        |         |         |   |
| C (3)  | 51 (1) | 31 (1) | 32 (1) | -6 (1)  | 8 (1)   | - |
| 8 (1)  |        |        |        |         |         |   |
| C (4)  | 50 (1) | 26 (1) | 44 (1) | -13 (1) | -2 (1)  | - |
| 8 (1)  |        |        |        |         |         |   |
| C (5)  | 72 (1) | 31 (1) | 37 (1) | -20 (1) | -3 (1)  | - |
| 8 (1)  |        |        |        |         |         |   |
| C (6)  | 54 (1) | 28 (1) | 24 (1) | -14 (1) | 0 (1)   | - |
| 5 (1)  |        |        |        |         |         |   |
| C (7)  | 18 (1) | 35 (1) | 31 (1) | -18 (1) | 0 (1)   | - |
| 3 (1)  |        |        |        |         |         |   |
| C (8)  | 33 (1) | 42 (1) | 35 (1) | -13 (1) | -7 (1)  |   |
| 1 (1)  |        |        |        |         |         |   |
| C (9)  | 37 (1) | 39 (1) | 45 (1) | -12 (1) | 0 (1)   | - |
| 16 (1) |        |        |        |         |         |   |
| C (10) | 26 (1) | 22 (1) | 27 (1) | -14 (1) | -4 (1)  |   |
| 2 (1)  |        |        |        |         |         |   |
| C (11) | 24 (1) | 29 (1) | 31 (1) | -17 (1) | -3 (1)  |   |
| 1 (1)  |        |        |        |         |         |   |
| C (12) | 26 (1) | 35 (1) | 43 (1) | -24 (1) | -7 (1)  |   |
| 2 (1)  |        |        |        |         |         |   |
| C (13) | 35 (1) | 35 (1) | 39 (1) | -25 (1) | -14 (1) |   |
| 12 (1) |        |        |        |         |         |   |
| C (14) | 44 (1) | 32 (1) | 27 (1) | -14 (1) | -9 (1)  |   |
| 8 (1)  |        |        |        |         |         |   |
| C (15) | 37 (1) | 22 (1) | 28 (1) | -11 (1) | -3 (1)  |   |
| 1 (1)  |        |        |        |         |         |   |
| C (16) | 32 (1) | 49 (1) | 36 (1) | -19 (1) | 4 (1)   | - |
| 11 (1) |        |        |        |         |         |   |
| C (17) | 46 (1) | 59 (1) | 53 (1) | -39 (1) | -24 (1) |   |
| 16 (1) |        |        |        |         |         |   |
| C (18) | 55 (1) | 37 (1) | 31 (1) | -6 (1)  | 1 (1)   | - |
| 15 (1) |        |        |        |         |         |   |
| C (19) | 22 (1) | 26 (1) | 21 (1) | -11 (1) | 1 (1)   |   |
| 0 (1)  |        |        |        |         |         |   |
| C (20) | 29 (1) | 45 (1) | 24 (1) | -18 (1) | 1 (1)   | - |
| 6 (1)  |        |        |        |         |         |   |
| C (21) | 30 (1) | 65 (1) | 34 (1) | -23 (1) | -2 (1)  | - |
| 12 (1) |        |        |        |         |         |   |
| C (22) | 26 (1) | 81 (1) | 40 (1) | -26 (1) | 7 (1)   | - |
| 14 (1) |        |        |        |         |         |   |

|        |        |        |        |        |         |         |   |
|--------|--------|--------|--------|--------|---------|---------|---|
| 12 (1) | C (23) | 31 (1) | 84 (1) | 37 (1) | -34 (1) | 12 (1)  | - |
| 5 (1)  | C (25) | 28 (1) | 55 (1) | 28 (1) | -26 (1) | 4 (1)   | - |
| 0 (1)  | C (26) | 38 (1) | 21 (1) | 21 (1) | -8 (1)  | 3 (1)   |   |
| 18 (1) | C (27) | 49 (1) | 38 (1) | 42 (1) | -18 (1) | 15 (1)  | - |
| 8 (1)  | C (28) | 53 (1) | 41 (1) | 35 (1) | -14 (1) | -14 (1) |   |
| 3 (1)  | C (29) | 21 (1) | 28 (1) | 21 (1) | -11 (1) | 1 (1)   |   |
| 2 (1)  | C (30) | 26 (1) | 28 (1) | 25 (1) | -10 (1) | 2 (1)   |   |
| 4 (1)  | C (31) | 32 (1) | 31 (1) | 27 (1) | -6 (1)  | 6 (1)   |   |
| 15 (1) | C (32) | 36 (1) | 42 (1) | 21 (1) | -9 (1)  | 1 (1)   |   |
| 10 (1) | C (33) | 37 (1) | 47 (1) | 26 (1) | -19 (1) | -7 (1)  |   |
| 3 (1)  | C (34) | 27 (1) | 37 (1) | 28 (1) | -16 (1) | -4 (1)  |   |
| 9 (1)  | C (35) | 43 (1) | 34 (1) | 35 (1) | -14 (1) | -1 (1)  | - |
| 20 (1) | C (36) | 57 (1) | 54 (1) | 22 (1) | -8 (1)  | 1 (1)   |   |
| 8 (1)  | C (37) | 44 (1) | 47 (1) | 45 (1) | -22 (1) | -12 (1) | - |
| 5 (1)  | N (1)  | 20 (1) | 41 (1) | 32 (1) | -26 (1) | 2 (1)   | - |
| 1 (1)  | N (2)  | 25 (1) | 26 (1) | 29 (1) | -16 (1) | -2 (1)  | - |
| 1 (1)  | N (3)  | 40 (1) | 21 (1) | 19 (1) | -9 (1)  | 7 (1)   | - |
| 1 (1)  | N (4)  | 23 (1) | 28 (1) | 21 (1) | -10 (1) | 3 (1)   |   |
| 8 (1)  | O (1)  | 30 (1) | 35 (1) | 28 (1) | -16 (1) | 9 (1)   | - |
| 5 (1)  | O (2)  | 33 (1) | 28 (1) | 30 (1) | -18 (1) | 3 (1)   | - |
| 4 (1)  | S (1)  | 22 (1) | 25 (1) | 23 (1) | -14 (1) | 2 (1)   | - |
| 2 (1)  | S (2)  | 22 (1) | 23 (1) | 19 (1) | -11 (1) | 3 (1)   | - |

---

### Crystal data and structure refinement of compound 3

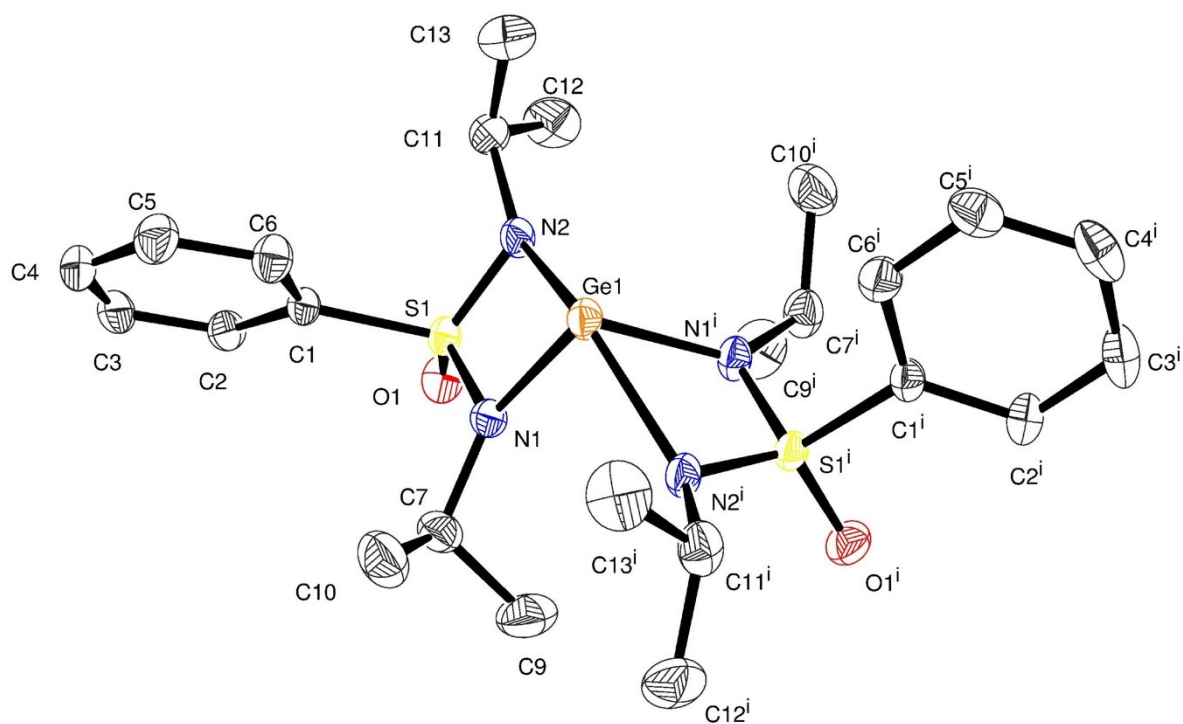

Figure 1 : Asymmetric Unit [Symmetry Code : 1-x,1-y,z]

Table 1. Crystal data and structure refinement for NL265.

|                      |                                                                                 |          |
|----------------------|---------------------------------------------------------------------------------|----------|
| Identification code  | NL265                                                                           |          |
| Empirical formula    | C <sub>24</sub> H <sub>38</sub> Ge N <sub>4</sub> O <sub>2</sub> S <sub>2</sub> |          |
| Formula weight       | 551.31                                                                          |          |
| Temperature          | 193(2) K                                                                        |          |
| Wavelength           | 0.71073 Å                                                                       |          |
| Crystal system       | Tetragonal                                                                      |          |
| Space group          | I4 <sub>1</sub>                                                                 |          |
| Unit cell dimensions | a = 21.9417(7) Å                                                                | α = 90°. |
|                      | b = 21.9417(7) Å                                                                | β = 90°. |
|                      | c = 6.6868(2) Å                                                                 | γ = 90°. |
| Volume               | 3219.3(2) Å <sup>3</sup>                                                        |          |
| Z                    | 4                                                                               |          |
| Density (calculated) | 1.137 Mg/m <sup>3</sup>                                                         |          |



|                                   |                                             |
|-----------------------------------|---------------------------------------------|
| Absorption coefficient            | 1.104 mm <sup>-1</sup>                      |
| Max. and min. transmission        | 0.7463 and 0.6494                           |
| F(000)                            | 1160                                        |
| Crystal size                      | 0.300 x 0.200 x 0.160 mm <sup>3</sup>       |
| Theta range for data collection   | 2.936 to 31.886°.                           |
| Index ranges                      | -21<=h<=32, -32<=k<=32, -9<=l<=9            |
| Reflections collected             | 38402                                       |
| Independent reflections           | 5530 [R(int) = 0.0265]                      |
| Completeness to theta = 25.242°   | 99.2 %                                      |
| Refinement method                 | Full-matrix least-squares on F <sup>2</sup> |
| Data / restraints / parameters    | 5530 / 1 / 154                              |
| Goodness-of-fit on F <sup>2</sup> | 1.023                                       |
| Final R indices [I>2sigma(I)]     | R1 = 0.0198, wR2 = 0.0483                   |
| R indices (all data)              | R1 = 0.0236, wR2 = 0.0503                   |
| Absolute structure parameter      | -0.0079(18)                                 |
| Largest diff. peak and hole       | 0.204 and -0.209 e.Å <sup>-3</sup>          |

Table 2. Atomic coordinates ( $\times 10^4$ ) and equivalent isotropic displacement parameters ( $\text{\AA}^2 \times 10^3$ ) for NL265.  $U(\text{eq})$  is defined as one third of the trace of the orthogonalized  $U^{ij}$  tensor.

|       | x       | y       | z       | $U(\text{eq})$ |
|-------|---------|---------|---------|----------------|
| C(1)  | 4008(1) | 6442(1) | 4491(2) | 21(1)          |
| C(2)  | 3717(1) | 6936(1) | 5370(2) | 27(1)          |
| C(3)  | 3616(1) | 7458(1) | 4242(3) | 34(1)          |
| C(4)  | 3805(1) | 7486(1) | 2273(3) | 36(1)          |
| C(5)  | 4083(1) | 6984(1) | 1395(3) | 34(1)          |
| C(6)  | 4184(1) | 6460(1) | 2497(2) | 28(1)          |
| C(7)  | 5286(1) | 6144(1) | 6803(3) | 31(1)          |
| C(9)  | 5616(1) | 5869(1) | 8575(3) | 47(1)          |
| C(10) | 5711(1) | 6426(1) | 5281(3) | 44(1)          |
| C(11) | 3358(1) | 5150(1) | 4097(3) | 31(1)          |
| C(12) | 2975(1) | 4793(1) | 5594(3) | 45(1)          |
| C(13) | 3342(1) | 4870(1) | 2028(3) | 47(1)          |
| Ge(1) | 5000    | 5000    | 3860(1) | 22(1)          |
| N(1)  | 4896(1) | 5682(1) | 5832(2) | 24(1)          |
| N(2)  | 3998(1) | 5199(1) | 4772(2) | 24(1)          |
| O(1)  | 3938(1) | 5905(1) | 7895(2) | 31(1)          |
| S(1)  | 4185(1) | 5779(1) | 5929(1) | 21(1)          |

Table 3. Bond lengths [ $\text{\AA}$ ] and angles [ $^\circ$ ] for NL265.

---

|              |            |
|--------------|------------|
| C(1)-C(2)    | 1.3874(19) |
| C(1)-C(6)    | 1.389(2)   |
| C(1)-S(1)    | 1.7881(14) |
| C(2)-C(3)    | 1.390(2)   |
| C(2)-H(2)    | 0.9500     |
| C(3)-C(4)    | 1.382(3)   |
| C(3)-H(3)    | 0.9500     |
| C(4)-C(5)    | 1.389(3)   |
| C(4)-H(4)    | 0.9500     |
| C(5)-C(6)    | 1.384(2)   |
| C(5)-H(5)    | 0.9500     |
| C(6)-H(6)    | 0.9500     |
| C(7)-N(1)    | 1.4761(19) |
| C(7)-C(10)   | 1.512(3)   |
| C(7)-C(9)    | 1.513(3)   |
| C(7)-H(7)    | 1.0000     |
| C(9)-H(9A)   | 0.9800     |
| C(9)-H(9B)   | 0.9800     |
| C(9)-H(9C)   | 0.9800     |
| C(10)-H(10A) | 0.9800     |
| C(10)-H(10B) | 0.9800     |
| C(10)-H(10C) | 0.9800     |
| C(11)-N(2)   | 1.4786(19) |
| C(11)-C(13)  | 1.515(3)   |
| C(11)-C(12)  | 1.524(3)   |
| C(11)-H(11)  | 1.0000     |
| C(12)-H(12A) | 0.9800     |
| C(12)-H(12B) | 0.9800     |
| C(12)-H(12C) | 0.9800     |
| C(13)-H(13A) | 0.9800     |
| C(13)-H(13B) | 0.9800     |
| C(13)-H(13C) | 0.9800     |
| Ge(1)-N(1)#1 | 2.0085(12) |
| Ge(1)-N(1)   | 2.0085(12) |
| Ge(1)-N(2)   | 2.3241(12) |
| Ge(1)-N(2)#1 | 2.3241(12) |

|                     |            |
|---------------------|------------|
| N(1)-S(1)           | 1.5757(12) |
| N(2)-S(1)           | 1.5445(13) |
| O(1)-S(1)           | 1.4484(11) |
|                     |            |
| C(2)-C(1)-C(6)      | 120.91(14) |
| C(2)-C(1)-S(1)      | 120.51(12) |
| C(6)-C(1)-S(1)      | 118.56(11) |
| C(1)-C(2)-C(3)      | 119.12(15) |
| C(1)-C(2)-H(2)      | 120.4      |
| C(3)-C(2)-H(2)      | 120.4      |
| C(4)-C(3)-C(2)      | 120.37(15) |
| C(4)-C(3)-H(3)      | 119.8      |
| C(2)-C(3)-H(3)      | 119.8      |
| C(3)-C(4)-C(5)      | 119.98(15) |
| C(3)-C(4)-H(4)      | 120.0      |
| C(5)-C(4)-H(4)      | 120.0      |
| C(6)-C(5)-C(4)      | 120.29(17) |
| C(6)-C(5)-H(5)      | 119.9      |
| C(4)-C(5)-H(5)      | 119.9      |
| C(5)-C(6)-C(1)      | 119.30(15) |
| C(5)-C(6)-H(6)      | 120.3      |
| C(1)-C(6)-H(6)      | 120.3      |
| N(1)-C(7)-C(10)     | 110.01(14) |
| N(1)-C(7)-C(9)      | 110.39(14) |
| C(10)-C(7)-C(9)     | 113.29(16) |
| N(1)-C(7)-H(7)      | 107.6      |
| C(10)-C(7)-H(7)     | 107.6      |
| C(9)-C(7)-H(7)      | 107.6      |
| C(7)-C(9)-H(9A)     | 109.5      |
| C(7)-C(9)-H(9B)     | 109.5      |
| H(9A)-C(9)-H(9B)    | 109.5      |
| C(7)-C(9)-H(9C)     | 109.5      |
| H(9A)-C(9)-H(9C)    | 109.5      |
| H(9B)-C(9)-H(9C)    | 109.5      |
| C(7)-C(10)-H(10A)   | 109.5      |
| C(7)-C(10)-H(10B)   | 109.5      |
| H(10A)-C(10)-H(10B) | 109.5      |
| C(7)-C(10)-H(10C)   | 109.5      |

|                     |            |
|---------------------|------------|
| H(10A)-C(10)-H(10C) | 109.5      |
| H(10B)-C(10)-H(10C) | 109.5      |
| N(2)-C(11)-C(13)    | 109.22(15) |
| N(2)-C(11)-C(12)    | 111.14(14) |
| C(13)-C(11)-C(12)   | 112.24(16) |
| N(2)-C(11)-H(11)    | 108.0      |
| C(13)-C(11)-H(11)   | 108.0      |
| C(12)-C(11)-H(11)   | 108.0      |
| C(11)-C(12)-H(12A)  | 109.5      |
| C(11)-C(12)-H(12B)  | 109.5      |
| H(12A)-C(12)-H(12B) | 109.5      |
| C(11)-C(12)-H(12C)  | 109.5      |
| H(12A)-C(12)-H(12C) | 109.5      |
| H(12B)-C(12)-H(12C) | 109.5      |
| C(11)-C(13)-H(13A)  | 109.5      |
| C(11)-C(13)-H(13B)  | 109.5      |
| H(13A)-C(13)-H(13B) | 109.5      |
| C(11)-C(13)-H(13C)  | 109.5      |
| H(13A)-C(13)-H(13C) | 109.5      |
| H(13B)-C(13)-H(13C) | 109.5      |
| N(1)#1-Ge(1)-N(1)   | 97.90(7)   |
| N(1)#1-Ge(1)-N(2)   | 94.31(5)   |
| N(1)-Ge(1)-N(2)     | 65.17(5)   |
| N(1)#1-Ge(1)-N(2)#1 | 65.17(5)   |
| N(1)-Ge(1)-N(2)#1   | 94.31(5)   |
| N(2)-Ge(1)-N(2)#1   | 149.57(7)  |
| C(7)-N(1)-S(1)      | 117.66(10) |
| C(7)-N(1)-Ge(1)     | 137.25(10) |
| S(1)-N(1)-Ge(1)     | 103.84(6)  |
| C(11)-N(2)-S(1)     | 117.78(10) |
| C(11)-N(2)-Ge(1)    | 143.60(10) |
| S(1)-N(2)-Ge(1)     | 91.95(6)   |
| O(1)-S(1)-N(2)      | 120.81(7)  |
| O(1)-S(1)-N(1)      | 115.67(7)  |
| N(2)-S(1)-N(1)      | 97.64(6)   |
| O(1)-S(1)-C(1)      | 104.55(7)  |
| N(2)-S(1)-C(1)      | 110.05(7)  |
| N(1)-S(1)-C(1)      | 107.64(7)  |

---

Symmetry transformations used to generate equivalent atoms:

#1  $-x+1, -y+1, z+0$

Table 4. Anisotropic displacement parameters ( $\text{\AA}^2 \times 10^3$ ) for NL265. The anisotropic displacement factor exponent takes the form:  $-2\pi^2 [ h^2 a^{*2} U^{11} + \dots + 2 h k a^* b^* U^{12} ]$

|       | $U^{11}$ | $U^{22}$ | $U^{33}$ | $U^{23}$ | $U^{13}$ | $U^{12}$ |
|-------|----------|----------|----------|----------|----------|----------|
| C(1)  | 21(1)    | 18(1)    | 25(1)    | 0(1)     | -1(1)    | 3(1)     |
| C(2)  | 28(1)    | 22(1)    | 30(1)    | -6(1)    | -3(1)    | 6(1)     |
| C(3)  | 38(1)    | 18(1)    | 46(1)    | -5(1)    | -11(1)   | 6(1)     |
| C(4)  | 40(1)    | 22(1)    | 46(1)    | 10(1)    | -14(1)   | -3(1)    |
| C(5)  | 37(1)    | 34(1)    | 31(1)    | 9(1)     | -1(1)    | -2(1)    |
| C(6)  | 31(1)    | 26(1)    | 27(1)    | 2(1)     | 4(1)     | 5(1)     |
| C(7)  | 28(1)    | 26(1)    | 39(1)    | -8(1)    | -3(1)    | 0(1)     |
| C(9)  | 44(1)    | 57(1)    | 40(1)    | -10(1)   | -14(1)   | 1(1)     |
| C(10) | 38(1)    | 31(1)    | 62(1)    | 2(1)     | 3(1)     | -6(1)    |
| C(11) | 23(1)    | 27(1)    | 43(1)    | -2(1)    | -8(1)    | 4(1)     |
| C(12) | 24(1)    | 54(1)    | 58(1)    | -4(1)    | 5(1)     | -5(1)    |
| C(13) | 49(1)    | 51(1)    | 40(1)    | -4(1)    | -13(1)   | -1(1)    |
| Ge(1) | 26(1)    | 19(1)    | 22(1)    | 0        | 0        | 3(1)     |
| N(1)  | 20(1)    | 20(1)    | 31(1)    | -4(1)    | -2(1)    | 4(1)     |
| N(2)  | 20(1)    | 19(1)    | 31(1)    | -2(1)    | 0(1)     | 4(1)     |
| O(1)  | 36(1)    | 33(1)    | 25(1)    | 1(1)     | 7(1)     | 6(1)     |
| S(1)  | 21(1)    | 19(1)    | 22(1)    | 1(1)     | 2(1)     | 5(1)     |

## Crystal data and structure refinement of compound 4

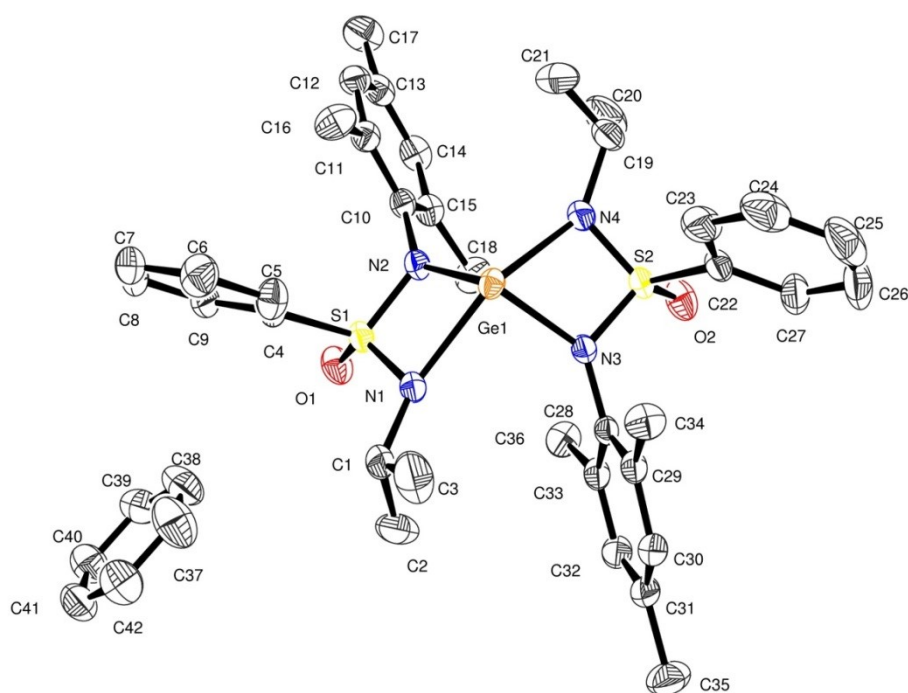

Figure 1 : Asymmetric Unit



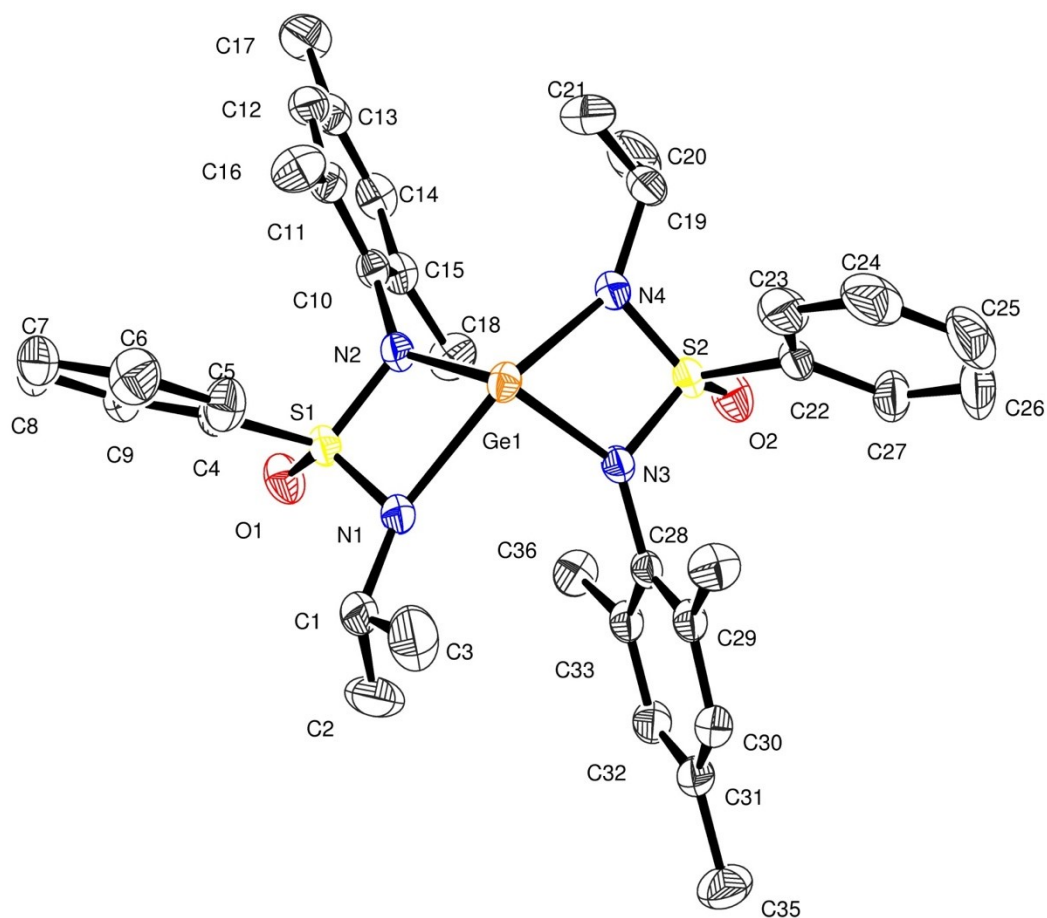

Figure 2 : Molecule

Table 1. Crystal data and structure refinement for 4.

|                             |                                                                                                                 |                       |
|-----------------------------|-----------------------------------------------------------------------------------------------------------------|-----------------------|
| Identification code         | 4                                                                                                               |                       |
| Empirical formula           | C <sub>36</sub> H <sub>46</sub> Ge N <sub>4</sub> O <sub>2</sub> S <sub>2</sub> , C <sub>6</sub> H <sub>6</sub> |                       |
| Formula weight              | 781.61                                                                                                          |                       |
| Temperature                 | 193(2) K                                                                                                        |                       |
| Wavelength                  | 0.71073 Å                                                                                                       |                       |
| Crystal system, space group | Monoclinic, P 2 <sub>1</sub> /c                                                                                 |                       |
| Unit cell dimensions        | a = 15.4414(5) Å                                                                                                | alpha = 90 deg.       |
|                             | b = 7.9913(3) Å                                                                                                 | beta = 94.717(2) deg. |
|                             | c = 33.5748(10) Å                                                                                               | gamma = 90 deg.       |
| Volume                      | 4129.0(2) Å <sup>3</sup>                                                                                        |                       |

|                                   |                                             |
|-----------------------------------|---------------------------------------------|
| Z, Calculated density             | 4, 1.257 Mg/m <sup>3</sup>                  |
| Absorption coefficient            | 0.882 mm <sup>-1</sup>                      |
| F(000)                            | 1648                                        |
| Crystal size                      | 0.160 x 0.140 x 0.080 mm                    |
| Theta range for data collection   | 1.323 to 38.427 deg.                        |
| Limiting indices                  | -26<=h<=27, -13<=k<=13,<br>-58<=l<=44       |
| Reflections collected / unique    | 113581 / 22870 [R(int) = 0.0451]            |
| Completeness to theta = 25.242    | 99.6 %                                      |
| Refinement method                 | Full-matrix least-squares on F <sup>2</sup> |
| Data / restraints / parameters    | 22870 / 0 / 470                             |
| Goodness-of-fit on F <sup>2</sup> | 1.018                                       |
| Final R indices [I>2sigma(I)]     | R1 = 0.0466, wR2 = 0.1014                   |
| R indices (all data)              | R1 = 0.0940, wR2 = 0.1174                   |
| Largest diff. peak and hole       | 0.449 and -0.531 e.A <sup>-3</sup>          |

Table 2. Atomic coordinates ( $\times 10^4$ ) and equivalent isotropic displacement parameters ( $\text{\AA}^2 \times 10^3$ ) for 4.  $U(\text{eq})$  is defined as one third of the trace of the orthogonalized  $U_{ij}$  tensor.

|        | x         | y        | z        | U (eq) |
|--------|-----------|----------|----------|--------|
| C (1)  | 5419 (1)  | 3796 (3) | 3276 (1) | 44 (1) |
| C (2)  | 5132 (1)  | 5288 (4) | 3017 (1) | 75 (1) |
| C (3)  | 5640 (1)  | 2271 (4) | 3032 (1) | 71 (1) |
| C (4)  | 5404 (1)  | 3480 (2) | 4223 (1) | 29 (1) |
| C (5)  | 5497 (1)  | 1779 (2) | 4148 (1) | 37 (1) |
| C (6)  | 5026 (1)  | 623 (2)  | 4349 (1) | 45 (1) |
| C (7)  | 4467 (1)  | 1172 (3) | 4624 (1) | 45 (1) |
| C (8)  | 4380 (1)  | 2851 (3) | 4700 (1) | 44 (1) |
| C (9)  | 4845 (1)  | 4025 (2) | 4498 (1) | 35 (1) |
| C (10) | 7310 (1)  | 5531 (2) | 4524 (1) | 25 (1) |
| C (11) | 7393 (1)  | 4516 (2) | 4865 (1) | 29 (1) |
| C (12) | 7691 (1)  | 5236 (2) | 5231 (1) | 33 (1) |
| C (13) | 7899 (1)  | 6920 (2) | 5266 (1) | 34 (1) |
| C (14) | 7833 (1)  | 7881 (2) | 4922 (1) | 35 (1) |
| C (15) | 7550 (1)  | 7225 (2) | 4549 (1) | 30 (1) |
| C (16) | 7176 (1)  | 2678 (2) | 4854 (1) | 41 (1) |
| C (17) | 8169 (1)  | 7679 (3) | 5668 (1) | 50 (1) |
| C (18) | 7542 (1)  | 8314 (2) | 4183 (1) | 41 (1) |
| C (19) | 9595 (1)  | 4334 (3) | 4180 (1) | 47 (1) |
| C (20) | 9793 (1)  | 5971 (4) | 4394 (1) | 71 (1) |
| C (21) | 9440 (1)  | 2911 (4) | 4468 (1) | 71 (1) |
| C (22) | 9654 (1)  | 3603 (2) | 3243 (1) | 32 (1) |
| C (23) | 9667 (1)  | 1945 (2) | 3365 (1) | 45 (1) |
| C (24) | 10203 (1) | 825 (3)  | 3187 (1) | 58 (1) |
| C (25) | 10712 (1) | 1370 (3) | 2893 (1) | 66 (1) |
| C (26) | 10686 (1) | 3005 (3) | 2771 (1) | 63 (1) |
| C (27) | 10164 (1) | 4148 (3) | 2947 (1) | 44 (1) |
| C (28) | 7649 (1)  | 5010 (2) | 2885 (1) | 24 (1) |
| C (29) | 7624 (1)  | 3764 (2) | 2591 (1) | 27 (1) |
| C (30) | 7276 (1)  | 4158 (2) | 2205 (1) | 31 (1) |
| C (31) | 6970 (1)  | 5746 (2) | 2105 (1) | 34 (1) |
| C (32) | 6989 (1)  | 6951 (2) | 2403 (1) | 33 (1) |
| C (33) | 7315 (1)  | 6613 (2) | 2794 (1) | 28 (1) |
| C (34) | 7950 (1)  | 2014 (2) | 2671 (1) | 37 (1) |
| C (35) | 6627 (1)  | 6148 (3) | 1682 (1) | 54 (1) |
| C (36) | 7262 (1)  | 7923 (2) | 3112 (1) | 37 (1) |
| C (37) | 3098 (1)  | 5694 (3) | 3674 (1) | 68 (1) |
| C (38) | 3344 (1)  | 7029 (3) | 3913 (1) | 58 (1) |
| C (39) | 2733 (1)  | 8163 (2) | 4010 (1) | 50 (1) |
| C (40) | 1876 (1)  | 7960 (2) | 3867 (1) | 50 (1) |
| C (41) | 1629 (1)  | 6625 (2) | 3628 (1) | 49 (1) |
| C (42) | 2239 (1)  | 5480 (3) | 3531 (1) | 56 (1) |
| N (1)  | 6183 (1)  | 4234 (2) | 3551 (1) | 31 (1) |
| N (2)  | 7022 (1)  | 4837 (1) | 4141 (1) | 26 (1) |

|       |         |         |         |       |
|-------|---------|---------|---------|-------|
| N(3)  | 7969(1) | 4644(1) | 3289(1) | 25(1) |
| N(4)  | 8822(1) | 4486(2) | 3892(1) | 33(1) |
| O(1)  | 5615(1) | 6535(1) | 4015(1) | 39(1) |
| O(2)  | 9266(1) | 6668(1) | 3367(1) | 42(1) |
| S(1)  | 6036(1) | 4945(1) | 3970(1) | 26(1) |
| S(2)  | 8938(1) | 5031(1) | 3456(1) | 27(1) |
| Ge(1) | 7535(1) | 3287(1) | 3742(1) | 24(1) |

---

Table 3. Bond lengths [Å] and angles [deg] for 4.

---

|              |            |
|--------------|------------|
| C(1)-N(1)    | 1.4786(18) |
| C(1)-C(2)    | 1.519(3)   |
| C(1)-C(3)    | 1.523(3)   |
| C(1)-H(1)    | 1.0000     |
| C(2)-H(2A)   | 0.9800     |
| C(2)-H(2B)   | 0.9800     |
| C(2)-H(2C)   | 0.9800     |
| C(3)-H(3A)   | 0.9800     |
| C(3)-H(3B)   | 0.9800     |
| C(3)-H(3C)   | 0.9800     |
| C(4)-C(9)    | 1.3859(18) |
| C(4)-C(5)    | 1.392(2)   |
| C(4)-S(1)    | 1.7841(13) |
| C(5)-C(6)    | 1.386(2)   |
| C(5)-H(5)    | 0.9500     |
| C(6)-C(7)    | 1.384(3)   |
| C(6)-H(6)    | 0.9500     |
| C(7)-C(8)    | 1.374(3)   |
| C(7)-H(7)    | 0.9500     |
| C(8)-C(9)    | 1.390(2)   |
| C(8)-H(8)    | 0.9500     |
| C(9)-H(9)    | 0.9500     |
| C(10)-C(11)  | 1.4005(18) |
| C(10)-C(15)  | 1.4043(19) |
| C(10)-N(2)   | 1.4359(16) |
| C(11)-C(12)  | 1.3985(19) |
| C(11)-C(16)  | 1.506(2)   |
| C(12)-C(13)  | 1.386(2)   |
| C(12)-H(12)  | 0.9500     |
| C(13)-C(14)  | 1.383(2)   |
| C(13)-C(17)  | 1.509(2)   |
| C(14)-C(15)  | 1.395(2)   |
| C(14)-H(14)  | 0.9500     |
| C(15)-C(18)  | 1.504(2)   |
| C(16)-H(16A) | 0.9800     |
| C(16)-H(16B) | 0.9800     |
| C(16)-H(16C) | 0.9800     |
| C(17)-H(17A) | 0.9800     |
| C(17)-H(17B) | 0.9800     |
| C(17)-H(17C) | 0.9800     |
| C(18)-H(18A) | 0.9800     |
| C(18)-H(18B) | 0.9800     |
| C(18)-H(18C) | 0.9800     |
| C(19)-N(4)   | 1.4779(18) |
| C(19)-C(20)  | 1.513(3)   |
| C(19)-C(21)  | 1.525(3)   |
| C(19)-H(19)  | 1.0000     |
| C(20)-H(20A) | 0.9800     |
| C(20)-H(20B) | 0.9800     |
| C(20)-H(20C) | 0.9800     |
| C(21)-H(21A) | 0.9800     |
| C(21)-H(21B) | 0.9800     |
| C(21)-H(21C) | 0.9800     |
| C(22)-C(23)  | 1.387(2)   |

|                     |             |
|---------------------|-------------|
| C (22) -C (27)      | 1.388 (2)   |
| C (22) -S (2)       | 1.7778 (14) |
| C (23) -C (24)      | 1.387 (2)   |
| C (23) -H (23)      | 0.9500      |
| C (24) -C (25)      | 1.383 (3)   |
| C (24) -H (24)      | 0.9500      |
| C (25) -C (26)      | 1.369 (4)   |
| C (25) -H (25)      | 0.9500      |
| C (26) -C (27)      | 1.384 (3)   |
| C (26) -H (26)      | 0.9500      |
| C (27) -H (27)      | 0.9500      |
| C (28) -C (29)      | 1.4014 (18) |
| C (28) -C (33)      | 1.4049 (18) |
| C (28) -N (3)       | 1.4342 (16) |
| C (29) -C (30)      | 1.3958 (19) |
| C (29) -C (34)      | 1.5034 (19) |
| C (30) -C (31)      | 1.386 (2)   |
| C (30) -H (30)      | 0.9500      |
| C (31) -C (32)      | 1.385 (2)   |
| C (31) -C (35)      | 1.510 (2)   |
| C (32) -C (33)      | 1.3954 (19) |
| C (32) -H (32)      | 0.9500      |
| C (33) -C (36)      | 1.502 (2)   |
| C (34) -H (34A)     | 0.9800      |
| C (34) -H (34B)     | 0.9800      |
| C (34) -H (34C)     | 0.9800      |
| C (35) -H (35A)     | 0.9800      |
| C (35) -H (35B)     | 0.9800      |
| C (35) -H (35C)     | 0.9800      |
| C (36) -H (36A)     | 0.9800      |
| C (36) -H (36B)     | 0.9800      |
| C (36) -H (36C)     | 0.9800      |
| C (37) -C (38)      | 1.370 (3)   |
| C (37) -C (42)      | 1.384 (3)   |
| C (37) -H (37)      | 0.9500      |
| C (38) -C (39)      | 1.366 (3)   |
| C (38) -H (38)      | 0.9500      |
| C (39) -C (40)      | 1.381 (2)   |
| C (39) -H (39)      | 0.9500      |
| C (40) -C (41)      | 1.370 (3)   |
| C (40) -H (40)      | 0.9500      |
| C (41) -C (42)      | 1.372 (3)   |
| C (41) -H (41)      | 0.9500      |
| C (42) -H (42)      | 0.9500      |
| N (1) -S (1)        | 1.5505 (12) |
| N (1) -Ge (1)       | 2.2635 (11) |
| N (2) -S (1)        | 1.5845 (11) |
| N (2) -Ge (1)       | 2.0328 (10) |
| N (3) -S (2)        | 1.5842 (11) |
| N (3) -Ge (1)       | 2.0273 (10) |
| N (4) -S (2)        | 1.5512 (12) |
| N (4) -Ge (1)       | 2.2257 (12) |
| O (1) -S (1)        | 1.4415 (11) |
| O (2) -S (2)        | 1.4419 (11) |
| N (1) -C (1) -C (2) | 110.56 (15) |
| N (1) -C (1) -C (3) | 108.79 (14) |
| C (2) -C (1) -C (3) | 112.82 (18) |

|                     |            |
|---------------------|------------|
| N(1)-C(1)-H(1)      | 108.2      |
| C(2)-C(1)-H(1)      | 108.2      |
| C(3)-C(1)-H(1)      | 108.2      |
| C(1)-C(2)-H(2A)     | 109.5      |
| C(1)-C(2)-H(2B)     | 109.5      |
| H(2A)-C(2)-H(2B)    | 109.5      |
| C(1)-C(2)-H(2C)     | 109.5      |
| H(2A)-C(2)-H(2C)    | 109.5      |
| H(2B)-C(2)-H(2C)    | 109.5      |
| C(1)-C(3)-H(3A)     | 109.5      |
| C(1)-C(3)-H(3B)     | 109.5      |
| H(3A)-C(3)-H(3B)    | 109.5      |
| C(1)-C(3)-H(3C)     | 109.5      |
| H(3A)-C(3)-H(3C)    | 109.5      |
| H(3B)-C(3)-H(3C)    | 109.5      |
| C(9)-C(4)-C(5)      | 120.44(13) |
| C(9)-C(4)-S(1)      | 120.48(12) |
| C(5)-C(4)-S(1)      | 119.06(10) |
| C(6)-C(5)-C(4)      | 119.75(14) |
| C(6)-C(5)-H(5)      | 120.1      |
| C(4)-C(5)-H(5)      | 120.1      |
| C(7)-C(6)-C(5)      | 119.62(17) |
| C(7)-C(6)-H(6)      | 120.2      |
| C(5)-C(6)-H(6)      | 120.2      |
| C(8)-C(7)-C(6)      | 120.60(15) |
| C(8)-C(7)-H(7)      | 119.7      |
| C(6)-C(7)-H(7)      | 119.7      |
| C(7)-C(8)-C(9)      | 120.39(15) |
| C(7)-C(8)-H(8)      | 119.8      |
| C(9)-C(8)-H(8)      | 119.8      |
| C(4)-C(9)-C(8)      | 119.18(16) |
| C(4)-C(9)-H(9)      | 120.4      |
| C(8)-C(9)-H(9)      | 120.4      |
| C(11)-C(10)-C(15)   | 120.23(12) |
| C(11)-C(10)-N(2)    | 120.61(12) |
| C(15)-C(10)-N(2)    | 119.08(12) |
| C(12)-C(11)-C(10)   | 118.73(13) |
| C(12)-C(11)-C(16)   | 118.61(13) |
| C(10)-C(11)-C(16)   | 122.66(12) |
| C(13)-C(12)-C(11)   | 122.07(14) |
| C(13)-C(12)-H(12)   | 119.0      |
| C(11)-C(12)-H(12)   | 119.0      |
| C(14)-C(13)-C(12)   | 117.91(13) |
| C(14)-C(13)-C(17)   | 121.37(15) |
| C(12)-C(13)-C(17)   | 120.71(15) |
| C(13)-C(14)-C(15)   | 122.43(14) |
| C(13)-C(14)-H(14)   | 118.8      |
| C(15)-C(14)-H(14)   | 118.8      |
| C(14)-C(15)-C(10)   | 118.54(13) |
| C(14)-C(15)-C(18)   | 119.74(13) |
| C(10)-C(15)-C(18)   | 121.67(12) |
| C(11)-C(16)-H(16A)  | 109.5      |
| C(11)-C(16)-H(16B)  | 109.5      |
| H(16A)-C(16)-H(16B) | 109.5      |
| C(11)-C(16)-H(16C)  | 109.5      |
| H(16A)-C(16)-H(16C) | 109.5      |
| H(16B)-C(16)-H(16C) | 109.5      |
| C(13)-C(17)-H(17A)  | 109.5      |

|                          |             |
|--------------------------|-------------|
| C (13) -C (17) -H (17B)  | 109.5       |
| H (17A) -C (17) -H (17B) | 109.5       |
| C (13) -C (17) -H (17C)  | 109.5       |
| H (17A) -C (17) -H (17C) | 109.5       |
| H (17B) -C (17) -H (17C) | 109.5       |
| C (15) -C (18) -H (18A)  | 109.5       |
| C (15) -C (18) -H (18B)  | 109.5       |
| H (18A) -C (18) -H (18B) | 109.5       |
| C (15) -C (18) -H (18C)  | 109.5       |
| H (18A) -C (18) -H (18C) | 109.5       |
| H (18B) -C (18) -H (18C) | 109.5       |
| N (4) -C (19) -C (20)    | 111.20 (16) |
| N (4) -C (19) -C (21)    | 108.49 (15) |
| C (20) -C (19) -C (21)   | 112.23 (17) |
| N (4) -C (19) -H (19)    | 108.3       |
| C (20) -C (19) -H (19)   | 108.3       |
| C (21) -C (19) -H (19)   | 108.3       |
| C (19) -C (20) -H (20A)  | 109.5       |
| C (19) -C (20) -H (20B)  | 109.5       |
| H (20A) -C (20) -H (20B) | 109.5       |
| C (19) -C (20) -H (20C)  | 109.5       |
| H (20A) -C (20) -H (20C) | 109.5       |
| H (20B) -C (20) -H (20C) | 109.5       |
| C (19) -C (21) -H (21A)  | 109.5       |
| C (19) -C (21) -H (21B)  | 109.5       |
| H (21A) -C (21) -H (21B) | 109.5       |
| C (19) -C (21) -H (21C)  | 109.5       |
| H (21A) -C (21) -H (21C) | 109.5       |
| H (21B) -C (21) -H (21C) | 109.5       |
| C (23) -C (22) -C (27)   | 121.09 (15) |
| C (23) -C (22) -S (2)    | 119.27 (11) |
| C (27) -C (22) -S (2)    | 119.59 (13) |
| C (22) -C (23) -C (24)   | 118.90 (18) |
| C (22) -C (23) -H (23)   | 120.6       |
| C (24) -C (23) -H (23)   | 120.6       |
| C (25) -C (24) -C (23)   | 120.0 (2)   |
| C (25) -C (24) -H (24)   | 120.0       |
| C (23) -C (24) -H (24)   | 120.0       |
| C (26) -C (25) -C (24)   | 120.71 (18) |
| C (26) -C (25) -H (25)   | 119.6       |
| C (24) -C (25) -H (25)   | 119.6       |
| C (25) -C (26) -C (27)   | 120.35 (19) |
| C (25) -C (26) -H (26)   | 119.8       |
| C (27) -C (26) -H (26)   | 119.8       |
| C (26) -C (27) -C (22)   | 119.0 (2)   |
| C (26) -C (27) -H (27)   | 120.5       |
| C (22) -C (27) -H (27)   | 120.5       |
| C (29) -C (28) -C (33)   | 120.41 (12) |
| C (29) -C (28) -N (3)    | 120.61 (11) |
| C (33) -C (28) -N (3)    | 118.88 (12) |
| C (30) -C (29) -C (28)   | 118.69 (12) |
| C (30) -C (29) -C (34)   | 118.29 (13) |
| C (28) -C (29) -C (34)   | 123.01 (12) |
| C (31) -C (30) -C (29)   | 121.89 (13) |
| C (31) -C (30) -H (30)   | 119.1       |
| C (29) -C (30) -H (30)   | 119.1       |
| C (32) -C (31) -C (30)   | 118.42 (13) |
| C (32) -C (31) -C (35)   | 121.02 (14) |



|                          |             |
|--------------------------|-------------|
| C (30) -C (31) -C (35)   | 120.56 (15) |
| C (31) -C (32) -C (33)   | 121.92 (13) |
| C (31) -C (32) -H (32)   | 119.0       |
| C (33) -C (32) -H (32)   | 119.0       |
| C (32) -C (33) -C (28)   | 118.61 (13) |
| C (32) -C (33) -C (36)   | 119.87 (12) |
| C (28) -C (33) -C (36)   | 121.45 (12) |
| C (29) -C (34) -H (34A)  | 109.5       |
| C (29) -C (34) -H (34B)  | 109.5       |
| H (34A) -C (34) -H (34B) | 109.5       |
| C (29) -C (34) -H (34C)  | 109.5       |
| H (34A) -C (34) -H (34C) | 109.5       |
| H (34B) -C (34) -H (34C) | 109.5       |
| C (31) -C (35) -H (35A)  | 109.5       |
| C (31) -C (35) -H (35B)  | 109.5       |
| H (35A) -C (35) -H (35B) | 109.5       |
| C (31) -C (35) -H (35C)  | 109.5       |
| H (35A) -C (35) -H (35C) | 109.5       |
| H (35B) -C (35) -H (35C) | 109.5       |
| C (33) -C (36) -H (36A)  | 109.5       |
| C (33) -C (36) -H (36B)  | 109.5       |
| H (36A) -C (36) -H (36B) | 109.5       |
| C (33) -C (36) -H (36C)  | 109.5       |
| H (36A) -C (36) -H (36C) | 109.5       |
| H (36B) -C (36) -H (36C) | 109.5       |
| C (38) -C (37) -C (42)   | 120.84 (19) |
| C (38) -C (37) -H (37)   | 119.6       |
| C (42) -C (37) -H (37)   | 119.6       |
| C (39) -C (38) -C (37)   | 119.47 (18) |
| C (39) -C (38) -H (38)   | 120.3       |
| C (37) -C (38) -H (38)   | 120.3       |
| C (38) -C (39) -C (40)   | 120.05 (19) |
| C (38) -C (39) -H (39)   | 120.0       |
| C (40) -C (39) -H (39)   | 120.0       |
| C (41) -C (40) -C (39)   | 120.52 (18) |
| C (41) -C (40) -H (40)   | 119.7       |
| C (39) -C (40) -H (40)   | 119.7       |
| C (40) -C (41) -C (42)   | 119.67 (17) |
| C (40) -C (41) -H (41)   | 120.2       |
| C (42) -C (41) -H (41)   | 120.2       |
| C (41) -C (42) -C (37)   | 119.4 (2)   |
| C (41) -C (42) -H (42)   | 120.3       |
| C (37) -C (42) -H (42)   | 120.3       |
| C (1) -N (1) -S (1)      | 118.94 (10) |
| C (1) -N (1) -Ge (1)     | 140.20 (11) |
| S (1) -N (1) -Ge (1)     | 93.71 (5)   |
| C (10) -N (2) -S (1)     | 121.47 (8)  |
| C (10) -N (2) -Ge (1)    | 135.75 (8)  |
| S (1) -N (2) -Ge (1)     | 102.00 (5)  |
| C (28) -N (3) -S (2)     | 122.46 (8)  |
| C (28) -N (3) -Ge (1)    | 135.13 (8)  |
| S (2) -N (3) -Ge (1)     | 101.54 (5)  |
| C (19) -N (4) -S (2)     | 119.37 (10) |
| C (19) -N (4) -Ge (1)    | 140.34 (11) |
| S (2) -N (4) -Ge (1)     | 94.53 (5)   |
| O (1) -S (1) -N (1)      | 121.34 (7)  |
| O (1) -S (1) -N (2)      | 115.98 (6)  |
| N (1) -S (1) -N (2)      | 95.90 (6)   |

|                 |           |
|-----------------|-----------|
| O(1)-S(1)-C(4)  | 104.96(6) |
| N(1)-S(1)-C(4)  | 108.55(7) |
| N(2)-S(1)-C(4)  | 109.72(6) |
| O(2)-S(2)-N(4)  | 121.24(8) |
| O(2)-S(2)-N(3)  | 116.15(6) |
| N(4)-S(2)-N(3)  | 95.70(6)  |
| O(2)-S(2)-C(22) | 105.06(7) |
| N(4)-S(2)-C(22) | 108.82(7) |
| N(3)-S(2)-C(22) | 109.44(6) |
| N(3)-Ge(1)-N(2) | 109.87(5) |
| N(3)-Ge(1)-N(4) | 66.08(4)  |
| N(2)-Ge(1)-N(4) | 88.77(4)  |
| N(3)-Ge(1)-N(1) | 87.85(4)  |
| N(2)-Ge(1)-N(1) | 65.37(4)  |
| N(4)-Ge(1)-N(1) | 134.89(5) |

---

Symmetry transformations used to generate equivalent atoms:

Table 4. Anisotropic displacement parameters ( $\text{\AA}^2 \times 10^3$ ) for 4.  
The anisotropic displacement factor exponent takes the form:  
 $-2 \pi^2 [ h^2 a^{*2} U_{11} + \dots + 2 h k a^* b^* U_{12} ]$

| U12   | U11   | U22    | U33   | U23    | U13    |   |
|-------|-------|--------|-------|--------|--------|---|
| C(1)  | 27(1) | 73(1)  | 31(1) | -1(1)  | 4(1)   | - |
| 14(1) |       |        |       |        |        |   |
| C(2)  | 44(1) | 121(2) | 58(1) | 42(1)  | -19(1) | - |
| 23(1) |       |        |       |        |        |   |
| C(3)  | 46(1) | 114(2) | 54(1) | -44(1) | 12(1)  | - |
| 23(1) |       |        |       |        |        |   |
| C(4)  | 23(1) | 34(1)  | 29(1) | 1(1)   | 6(1)   | - |
| 1(1)  |       |        |       |        |        |   |
| C(5)  | 39(1) | 34(1)  | 40(1) | -4(1)  | 13(1)  | - |
| 8(1)  |       |        |       |        |        |   |
| C(6)  | 47(1) | 38(1)  | 50(1) | 2(1)   | 6(1)   | - |
| 13(1) |       |        |       |        |        |   |
| C(7)  | 32(1) | 60(1)  | 45(1) | 16(1)  | 5(1)   | - |
| 13(1) |       |        |       |        |        |   |
| C(8)  | 27(1) | 66(1)  | 40(1) | 12(1)  | 13(1)  |   |
| 5(1)  |       |        |       |        |        |   |
| C(9)  | 26(1) | 45(1)  | 36(1) | 4(1)   | 10(1)  |   |
| 8(1)  |       |        |       |        |        |   |
| C(10) | 23(1) | 25(1)  | 28(1) | -3(1)  | 5(1)   |   |
| 2(1)  |       |        |       |        |        |   |
| C(11) | 29(1) | 26(1)  | 31(1) | -1(1)  | 6(1)   |   |
| 5(1)  |       |        |       |        |        |   |
| C(12) | 32(1) | 37(1)  | 30(1) | -1(1)  | 3(1)   |   |
| 8(1)  |       |        |       |        |        |   |
| C(13) | 29(1) | 39(1)  | 35(1) | -10(1) | 2(1)   |   |
| 7(1)  |       |        |       |        |        |   |
| C(14) | 34(1) | 28(1)  | 44(1) | -10(1) | 5(1)   |   |
| 0(1)  |       |        |       |        |        |   |
| C(15) | 30(1) | 25(1)  | 35(1) | -2(1)  | 5(1)   |   |
| 1(1)  |       |        |       |        |        |   |
| C(16) | 56(1) | 28(1)  | 38(1) | 4(1)   | 3(1)   |   |
| 2(1)  |       |        |       |        |        |   |
| C(17) | 50(1) | 57(1)  | 41(1) | -19(1) | -3(1)  |   |
| 9(1)  |       |        |       |        |        |   |
| C(18) | 53(1) | 28(1)  | 43(1) | 3(1)   | 6(1)   | - |
| 6(1)  |       |        |       |        |        |   |
| C(19) | 26(1) | 84(1)  | 32(1) | -6(1)  | 0(1)   |   |
| 15(1) |       |        |       |        |        |   |
| C(20) | 39(1) | 115(2) | 56(1) | -36(1) | -9(1)  |   |
| 3(1)  |       |        |       |        |        |   |
| C(21) | 54(1) | 118(2) | 39(1) | 20(1)  | -1(1)  |   |
| 28(1) |       |        |       |        |        |   |
| C(22) | 21(1) | 45(1)  | 31(1) | -4(1)  | 4(1)   |   |
| 5(1)  |       |        |       |        |        |   |
| C(23) | 43(1) | 48(1)  | 43(1) | 0(1)   | 3(1)   |   |
| 19(1) |       |        |       |        |        |   |

|        |        |         |         |         |        |   |
|--------|--------|---------|---------|---------|--------|---|
| C (24) | 53 (1) | 62 (1)  | 58 (1)  | -14 (1) | -8 (1) |   |
| 30 (1) |        |         |         |         |        |   |
| C (25) | 35 (1) | 97 (2)  | 67 (1)  | -39 (1) | 1 (1)  |   |
| 23 (1) |        |         |         |         |        |   |
| C (26) | 33 (1) | 100 (2) | 57 (1)  | -28 (1) | 21 (1) | - |
| 3 (1)  |        |         |         |         |        |   |
| C (27) | 28 (1) | 65 (1)  | 38 (1)  | -11 (1) | 11 (1) | - |
| 8 (1)  |        |         |         |         |        |   |
| C (28) | 19 (1) | 26 (1)  | 27 (1)  | 5 (1)   | 6 (1)  |   |
| 0 (1)  |        |         |         |         |        |   |
| C (29) | 23 (1) | 26 (1)  | 31 (1)  | 3 (1)   | 7 (1)  |   |
| 1 (1)  |        |         |         |         |        |   |
| C (30) | 28 (1) | 37 (1)  | 28 (1)  | 0 (1)   | 5 (1)  |   |
| 2 (1)  |        |         |         |         |        |   |
| C (31) | 29 (1) | 45 (1)  | 30 (1)  | 8 (1)   | 5 (1)  |   |
| 8 (1)  |        |         |         |         |        |   |
| C (32) | 32 (1) | 33 (1)  | 35 (1)  | 11 (1)  | 7 (1)  |   |
| 8 (1)  |        |         |         |         |        |   |
| C (33) | 25 (1) | 26 (1)  | 33 (1)  | 5 (1)   | 7 (1)  |   |
| 2 (1)  |        |         |         |         |        |   |
| C (34) | 45 (1) | 28 (1)  | 39 (1)  | 0 (1)   | 1 (1)  |   |
| 4 (1)  |        |         |         |         |        |   |
| C (35) | 62 (1) | 66 (1)  | 33 (1)  | 9 (1)   | 0 (1)  |   |
| 24 (1) |        |         |         |         |        |   |
| C (36) | 45 (1) | 28 (1)  | 40 (1)  | 2 (1)   | 7 (1)  |   |
| 7 (1)  |        |         |         |         |        |   |
| C (37) | 46 (1) | 57 (1)  | 100 (2) | -3 (1)  | 9 (1)  |   |
| 13 (1) |        |         |         |         |        |   |
| C (38) | 36 (1) | 55 (1)  | 81 (1)  | 11 (1)  | -9 (1) |   |
| 1 (1)  |        |         |         |         |        |   |
| C (39) | 48 (1) | 44 (1)  | 56 (1)  | 7 (1)   | -9 (1) | - |
| 4 (1)  |        |         |         |         |        |   |
| C (40) | 39 (1) | 49 (1)  | 61 (1)  | 0 (1)   | 1 (1)  |   |
| 5 (1)  |        |         |         |         |        |   |
| C (41) | 34 (1) | 55 (1)  | 57 (1)  | 3 (1)   | -3 (1) | - |
| 5 (1)  |        |         |         |         |        |   |
| C (42) | 53 (1) | 49 (1)  | 67 (1)  | -7 (1)  | 4 (1)  | - |
| 2 (1)  |        |         |         |         |        |   |
| N (1)  | 22 (1) | 43 (1)  | 27 (1)  | 0 (1)   | 4 (1)  | - |
| 3 (1)  |        |         |         |         |        |   |
| N (2)  | 21 (1) | 27 (1)  | 28 (1)  | -3 (1)  | 5 (1)  |   |
| 1 (1)  |        |         |         |         |        |   |
| N (3)  | 19 (1) | 29 (1)  | 28 (1)  | 5 (1)   | 4 (1)  |   |
| 0 (1)  |        |         |         |         |        |   |
| N (4)  | 23 (1) | 49 (1)  | 27 (1)  | -2 (1)  | 3 (1)  |   |
| 5 (1)  |        |         |         |         |        |   |
| O (1)  | 30 (1) | 31 (1)  | 56 (1)  | 4 (1)   | 9 (1)  |   |
| 8 (1)  |        |         |         |         |        |   |
| O (2)  | 29 (1) | 37 (1)  | 60 (1)  | 1 (1)   | 8 (1)  | - |
| 7 (1)  |        |         |         |         |        |   |
| S (1)  | 21 (1) | 27 (1)  | 31 (1)  | 1 (1)   | 6 (1)  |   |
| 1 (1)  |        |         |         |         |        |   |
| S (2)  | 19 (1) | 32 (1)  | 31 (1)  | 0 (1)   | 5 (1)  |   |
| 1 (1)  |        |         |         |         |        |   |
| Ge (1) | 27 (1) | 22 (1)  | 25 (1)  | 2 (1)   | 8 (1)  |   |
| 3 (1)  |        |         |         |         |        |   |

---

## Crystal data and structure refinement of compound 5

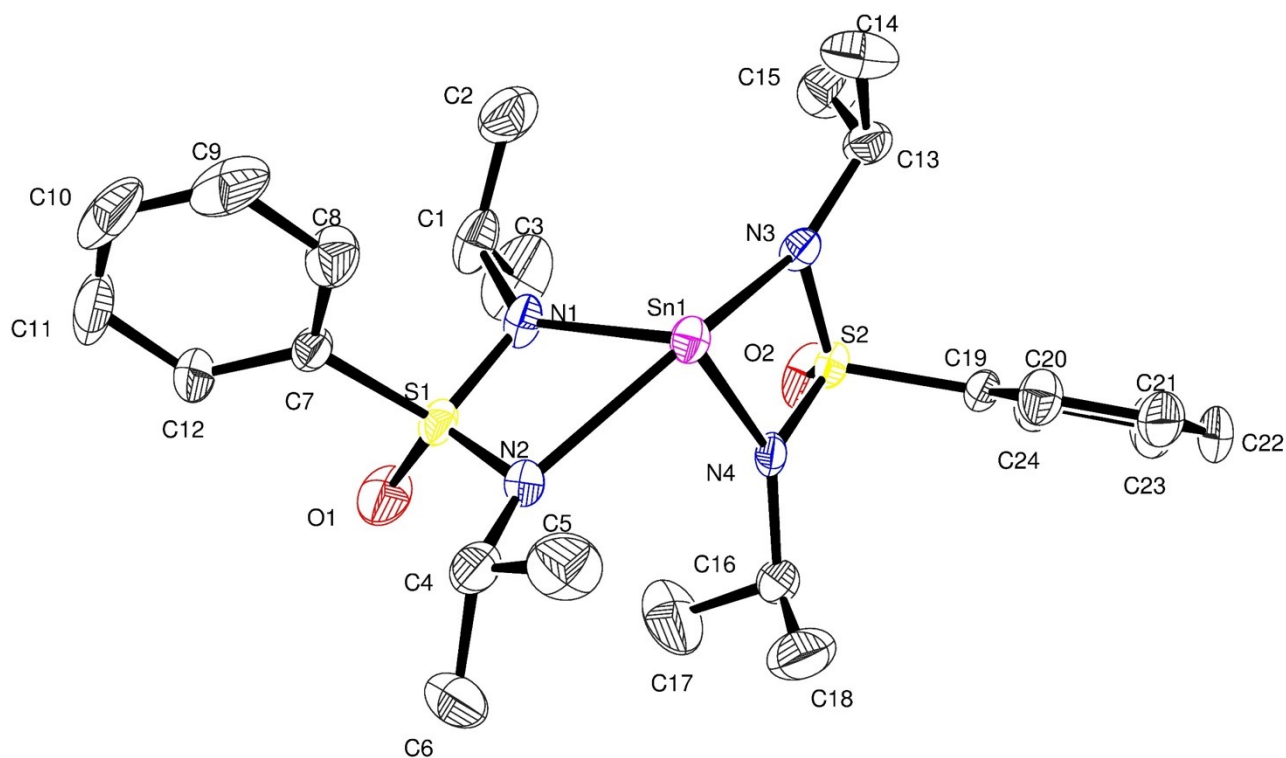

Figure 2 : Asymmetric Unit

Table 1. Crystal data and structure refinement for 5.

|                             |                                                                                 |                   |
|-----------------------------|---------------------------------------------------------------------------------|-------------------|
| Identification code         | 5                                                                               |                   |
| Empirical formula           | C <sub>24</sub> H <sub>38</sub> N <sub>4</sub> O <sub>2</sub> S <sub>2</sub> Sn |                   |
| Formula weight              | 597.41                                                                          |                   |
| Temperature                 | 193(2) K                                                                        |                   |
| Wavelength                  | 0.71073 Å                                                                       |                   |
| Crystal system, space group | Monoclinic, P 2 <sub>1</sub> /c                                                 |                   |
| Unit cell dimensions        | a = 8.3489(8) Å                                                                 | alpha = 90 deg.   |
| deg.                        | b = 43.317(4) Å                                                                 | beta = 107.199(2) |
|                             | c = 8.2449(8) Å                                                                 | gamma = 90 deg.   |
| Volume                      | 2848.4(5) Å <sup>3</sup>                                                        |                   |
| Z, Calculated density       | 4, 1.393 Mg/m <sup>3</sup>                                                      |                   |
| Absorption coefficient      | 1.070 mm <sup>-1</sup>                                                          |                   |
| F(000)                      | 1232                                                                            |                   |

|                                     |                                    |
|-------------------------------------|------------------------------------|
| Crystal size                        | 0.38 x 0.2 x 0.04 mm               |
| Theta range for data collection     | 2.821 to 25.367 deg.               |
| Limiting indices<br>9<=l<=9         | -10<=h<=10, -52<=k<=52, -          |
| Reflections collected / unique      | 49056 / 5176 [R(int) = 0.0378]     |
| Completeness to theta = 25.242      | 99.6 %                             |
| Refinement method<br>F <sup>2</sup> | Full-matrix least-squares on       |
| Data / restraints / parameters      | 5176 / 0 / 306                     |
| Goodness-of-fit on F <sup>2</sup>   | 1.487                              |
| Final R indices [I>2sigma(I)]       | R1 = 0.0611, wR2 = 0.1395          |
| R indices (all data)                | R1 = 0.0615, wR2 = 0.1396          |
| Largest diff. peak and hole         | 0.916 and -2.284 e.A <sup>-3</sup> |

Table 2. Atomic coordinates ( $\times 10^4$ ) and equivalent isotropic displacement parameters ( $\text{Å}^2 \times 10^3$ ) for 5.  $U(\text{eq})$  is defined as one third of the trace of the orthogonalized  $U_{ij}$  tensor.

|       | x          | y        | z          | $U(\text{eq})$ |
|-------|------------|----------|------------|----------------|
| C(1)  | 9070 (9)   | 3722 (2) | 4841 (10)  | 41 (2)         |
| C(2)  | 9463 (12)  | 3547 (3) | 3425 (13)  | 71 (3)         |
| C(3)  | 9076 (11)  | 3517 (2) | 6331 (11)  | 53 (2)         |
| C(4)  | 4848 (9)   | 4604 (2) | 3339 (9)   | 38 (2)         |
| C(5)  | 3164 (11)  | 4589 (2) | 3668 (12)  | 54 (2)         |
| C(6)  | 4758 (12)  | 4775 (2) | 1704 (13)  | 60 (3)         |
| C(7)  | 8430 (8)   | 4423 (2) | 5805 (8)   | 26 (1)         |
| C(8)  | 9758 (9)   | 4620 (2) | 5927 (10)  | 37 (2)         |
| C(9)  | 10577 (11) | 4746 (2) | 7513 (13)  | 58 (3)         |
| C(10) | 10070 (13) | 4676 (2) | 8894 (12)  | 62 (3)         |
| C(11) | 8756 (13)  | 4487 (2) | 8762 (10)  | 56 (2)         |
| C(12) | 7916 (10)  | 4358 (2) | 7201 (9)   | 40 (2)         |
| C(13) | 5111 (9)   | 2928 (2) | 4023 (9)   | 32 (2)         |
| C(14) | 6677 (11)  | 2741 (2) | 4151 (11)  | 48 (2)         |
| C(15) | 4836 (13)  | 2972 (2) | 5735 (11)  | 55 (2)         |
| C(16) | 3850 (10)  | 3764 (2) | -561 (8)   | 39 (2)         |
| C(17) | 2419 (14)  | 3985 (2) | -612 (12)  | 69 (3)         |
| C(18) | 5312 (16)  | 3919 (3) | -885 (11)  | 78 (4)         |
| C(19) | 2807 (7)   | 3068 (1) | 306 (8)    | 23 (1)         |
| C(20) | 1396 (8)   | 3146 (2) | 751 (9)    | 32 (2)         |
| C(21) | -102 (9)   | 2998 (2) | -33 (10)   | 42 (2)         |
| C(22) | -177 (11)  | 2777 (2) | -1251 (11) | 51 (2)         |
| C(23) | 1242 (12)  | 2700 (2) | -1672 (11) | 51 (2)         |
| C(24) | 2770 (9)   | 2843 (2) | -886 (9)   | 37 (2)         |
| N(4)  | 4351 (7)   | 3619 (1) | 1161 (6)   | 26 (1)         |
| O(1)  | 8353 (7)   | 4331 (1) | 2725 (6)   | 47 (1)         |
| O(2)  | 5868 (6)   | 3149 (1) | 429 (6)    | 40 (1)         |
| N(1)  | 7429 (7)   | 3878 (1) | 4222 (7)   | 29 (1)         |
| N(2)  | 5514 (7)   | 4291 (1) | 3336 (7)   | 30 (1)         |
| N(3)  | 5179 (7)   | 3234 (1) | 3269 (7)   | 26 (1)         |
| S(1)  | 7419 (2)   | 4234 (1) | 3853 (2)   | 26 (1)         |
| S(2)  | 4726 (2)   | 3265 (1) | 1302 (2)   | 23 (1)         |
| Sn(1) | 4769 (1)   | 3765 (1) | 3820 (1)   | 24 (1)         |

Table 3. Bond lengths [Å] and angles [deg] for 5.

---

|              |           |
|--------------|-----------|
| C(1)-N(1)    | 1.477(9)  |
| C(1)-C(2)    | 1.507(11) |
| C(1)-C(3)    | 1.513(12) |
| C(1)-H(1)    | 1.0000    |
| C(2)-H(2A)   | 0.9800    |
| C(2)-H(2B)   | 0.9800    |
| C(2)-H(2C)   | 0.9800    |
| C(3)-H(3A)   | 0.9800    |
| C(3)-H(3B)   | 0.9800    |
| C(3)-H(3C)   | 0.9800    |
| C(4)-N(2)    | 1.469(9)  |
| C(4)-C(5)    | 1.510(11) |
| C(4)-C(6)    | 1.519(11) |
| C(4)-H(4)    | 1.0000    |
| C(5)-H(5A)   | 0.9800    |
| C(5)-H(5B)   | 0.9800    |
| C(5)-H(5C)   | 0.9800    |
| C(6)-H(6A)   | 0.9800    |
| C(6)-H(6B)   | 0.9800    |
| C(6)-H(6C)   | 0.9800    |
| C(7)-C(12)   | 1.371(10) |
| C(7)-C(8)    | 1.379(9)  |
| C(7)-S(1)    | 1.779(6)  |
| C(8)-C(9)    | 1.396(11) |
| C(8)-H(8)    | 0.9500    |
| C(9)-C(10)   | 1.361(15) |
| C(9)-H(9)    | 0.9500    |
| C(10)-C(11)  | 1.347(14) |
| C(10)-H(10)  | 0.9500    |
| C(11)-C(12)  | 1.387(11) |
| C(11)-H(11)  | 0.9500    |
| C(12)-H(12)  | 0.9500    |
| C(13)-N(3)   | 1.473(9)  |
| C(13)-C(15)  | 1.507(11) |
| C(13)-C(14)  | 1.513(10) |
| C(13)-H(13)  | 1.0000    |
| C(14)-H(14A) | 0.9800    |
| C(14)-H(14B) | 0.9800    |
| C(14)-H(14C) | 0.9800    |
| C(15)-H(15A) | 0.9800    |
| C(15)-H(15B) | 0.9800    |
| C(15)-H(15C) | 0.9800    |
| C(16)-C(18)  | 1.485(12) |
| C(16)-N(4)   | 1.495(8)  |
| C(16)-C(17)  | 1.521(13) |
| C(16)-H(16)  | 1.0000    |
| C(17)-H(17A) | 0.9800    |
| C(17)-H(17B) | 0.9800    |
| C(17)-H(17C) | 0.9800    |
| C(18)-H(18A) | 0.9800    |
| C(18)-H(18B) | 0.9800    |
| C(18)-H(18C) | 0.9800    |
| C(19)-C(20)  | 1.376(9)  |
| C(19)-C(24)  | 1.378(9)  |



|                       |            |
|-----------------------|------------|
| C (19) -S (2)         | 1.786 (6)  |
| C (20) -C (21)        | 1.384 (10) |
| C (20) -H (20)        | 0.9500     |
| C (21) -C (22)        | 1.375 (12) |
| C (21) -H (21)        | 0.9500     |
| C (22) -C (23)        | 1.371 (13) |
| C (22) -H (22)        | 0.9500     |
| C (23) -C (24)        | 1.395 (11) |
| C (23) -H (23)        | 0.9500     |
| C (24) -H (24)        | 0.9500     |
| N (4) -S (2)          | 1.563 (6)  |
| N (4) -Sn (1)         | 2.208 (5)  |
| O (1) -S (1)          | 1.442 (5)  |
| O (2) -S (2)          | 1.445 (5)  |
| N (1) -S (1)          | 1.572 (6)  |
| N (1) -Sn (1)         | 2.202 (5)  |
| N (2) -S (1)          | 1.539 (6)  |
| N (2) -Sn (1)         | 2.426 (5)  |
| N (3) -S (2)          | 1.558 (5)  |
| N (3) -Sn (1)         | 2.389 (5)  |
|                       |            |
| N (1) -C (1) -C (2)   | 110.8 (6)  |
| N (1) -C (1) -C (3)   | 109.2 (6)  |
| C (2) -C (1) -C (3)   | 112.6 (8)  |
| N (1) -C (1) -H (1)   | 108.0      |
| C (2) -C (1) -H (1)   | 108.0      |
| C (3) -C (1) -H (1)   | 108.0      |
| C (1) -C (2) -H (2A)  | 109.5      |
| C (1) -C (2) -H (2B)  | 109.5      |
| H (2A) -C (2) -H (2B) | 109.5      |
| C (1) -C (2) -H (2C)  | 109.5      |
| H (2A) -C (2) -H (2C) | 109.5      |
| H (2B) -C (2) -H (2C) | 109.5      |
| C (1) -C (3) -H (3A)  | 109.5      |
| C (1) -C (3) -H (3B)  | 109.5      |
| H (3A) -C (3) -H (3B) | 109.5      |
| C (1) -C (3) -H (3C)  | 109.5      |
| H (3A) -C (3) -H (3C) | 109.5      |
| H (3B) -C (3) -H (3C) | 109.5      |
| N (2) -C (4) -C (5)   | 109.4 (6)  |
| N (2) -C (4) -C (6)   | 111.5 (7)  |
| C (5) -C (4) -C (6)   | 112.2 (7)  |
| N (2) -C (4) -H (4)   | 107.9      |
| C (5) -C (4) -H (4)   | 107.9      |
| C (6) -C (4) -H (4)   | 107.9      |
| C (4) -C (5) -H (5A)  | 109.5      |
| C (4) -C (5) -H (5B)  | 109.5      |
| H (5A) -C (5) -H (5B) | 109.5      |
| C (4) -C (5) -H (5C)  | 109.5      |
| H (5A) -C (5) -H (5C) | 109.5      |
| H (5B) -C (5) -H (5C) | 109.5      |
| C (4) -C (6) -H (6A)  | 109.5      |
| C (4) -C (6) -H (6B)  | 109.5      |
| H (6A) -C (6) -H (6B) | 109.5      |
| C (4) -C (6) -H (6C)  | 109.5      |
| H (6A) -C (6) -H (6C) | 109.5      |
| H (6B) -C (6) -H (6C) | 109.5      |
| C (12) -C (7) -C (8)  | 120.6 (6)  |

|                     |          |
|---------------------|----------|
| C(12)-C(7)-S(1)     | 118.9(5) |
| C(8)-C(7)-S(1)      | 120.4(5) |
| C(7)-C(8)-C(9)      | 118.1(8) |
| C(7)-C(8)-H(8)      | 120.9    |
| C(9)-C(8)-H(8)      | 120.9    |
| C(10)-C(9)-C(8)     | 120.6(8) |
| C(10)-C(9)-H(9)     | 119.7    |
| C(8)-C(9)-H(9)      | 119.7    |
| C(11)-C(10)-C(9)    | 121.1(8) |
| C(11)-C(10)-H(10)   | 119.5    |
| C(9)-C(10)-H(10)    | 119.5    |
| C(10)-C(11)-C(12)   | 119.6(9) |
| C(10)-C(11)-H(11)   | 120.2    |
| C(12)-C(11)-H(11)   | 120.2    |
| C(7)-C(12)-C(11)    | 120.0(8) |
| C(7)-C(12)-H(12)    | 120.0    |
| C(11)-C(12)-H(12)   | 120.0    |
| N(3)-C(13)-C(15)    | 108.5(6) |
| N(3)-C(13)-C(14)    | 111.6(6) |
| C(15)-C(13)-C(14)   | 111.7(6) |
| N(3)-C(13)-H(13)    | 108.3    |
| C(15)-C(13)-H(13)   | 108.3    |
| C(14)-C(13)-H(13)   | 108.3    |
| C(13)-C(14)-H(14A)  | 109.5    |
| C(13)-C(14)-H(14B)  | 109.5    |
| H(14A)-C(14)-H(14B) | 109.5    |
| C(13)-C(14)-H(14C)  | 109.5    |
| H(14A)-C(14)-H(14C) | 109.5    |
| H(14B)-C(14)-H(14C) | 109.5    |
| C(13)-C(15)-H(15A)  | 109.5    |
| C(13)-C(15)-H(15B)  | 109.5    |
| H(15A)-C(15)-H(15B) | 109.5    |
| C(13)-C(15)-H(15C)  | 109.5    |
| H(15A)-C(15)-H(15C) | 109.5    |
| H(15B)-C(15)-H(15C) | 109.5    |
| C(18)-C(16)-N(4)    | 110.3(6) |
| C(18)-C(16)-C(17)   | 113.1(8) |
| N(4)-C(16)-C(17)    | 106.7(7) |
| C(18)-C(16)-H(16)   | 108.9    |
| N(4)-C(16)-H(16)    | 108.9    |
| C(17)-C(16)-H(16)   | 108.9    |
| C(16)-C(17)-H(17A)  | 109.5    |
| C(16)-C(17)-H(17B)  | 109.5    |
| H(17A)-C(17)-H(17B) | 109.5    |
| C(16)-C(17)-H(17C)  | 109.5    |
| H(17A)-C(17)-H(17C) | 109.5    |
| H(17B)-C(17)-H(17C) | 109.5    |
| C(16)-C(18)-H(18A)  | 109.5    |
| C(16)-C(18)-H(18B)  | 109.5    |
| H(18A)-C(18)-H(18B) | 109.5    |
| C(16)-C(18)-H(18C)  | 109.5    |
| H(18A)-C(18)-H(18C) | 109.5    |
| H(18B)-C(18)-H(18C) | 109.5    |
| C(20)-C(19)-C(24)   | 121.6(6) |
| C(20)-C(19)-S(2)    | 118.9(5) |
| C(24)-C(19)-S(2)    | 119.6(5) |
| C(19)-C(20)-C(21)   | 119.2(7) |
| C(19)-C(20)-H(20)   | 120.4    |

|                      |             |
|----------------------|-------------|
| C (21)-C (20)-H (20) | 120.4       |
| C (22)-C (21)-C (20) | 120.2 (7)   |
| C (22)-C (21)-H (21) | 119.9       |
| C (20)-C (21)-H (21) | 119.9       |
| C (23)-C (22)-C (21) | 120.0 (7)   |
| C (23)-C (22)-H (22) | 120.0       |
| C (21)-C (22)-H (22) | 120.0       |
| C (22)-C (23)-C (24) | 120.8 (8)   |
| C (22)-C (23)-H (23) | 119.6       |
| C (24)-C (23)-H (23) | 119.6       |
| C (19)-C (24)-C (23) | 118.2 (7)   |
| C (19)-C (24)-H (24) | 120.9       |
| C (23)-C (24)-H (24) | 120.9       |
| C (16)-N (4)-S (2)   | 118.5 (5)   |
| C (16)-N (4)-Sn (1)  | 137.8 (5)   |
| S (2)-N (4)-Sn (1)   | 103.7 (3)   |
| C (1)-N (1)-S (1)    | 117.9 (5)   |
| C (1)-N (1)-Sn (1)   | 137.8 (5)   |
| S (1)-N (1)-Sn (1)   | 104.0 (3)   |
| C (4)-N (2)-S (1)    | 120.5 (5)   |
| C (4)-N (2)-Sn (1)   | 138.9 (5)   |
| S (1)-N (2)-Sn (1)   | 95.7 (3)    |
| C (13)-N (3)-S (2)   | 119.4 (4)   |
| C (13)-N (3)-Sn (1)  | 139.5 (4)   |
| S (2)-N (3)-Sn (1)   | 96.3 (3)    |
| O (1)-S (1)-N (2)    | 119.1 (3)   |
| O (1)-S (1)-N (1)    | 116.0 (3)   |
| N (2)-S (1)-N (1)    | 99.0 (3)    |
| O (1)-S (1)-C (7)    | 104.3 (3)   |
| N (2)-S (1)-C (7)    | 110.6 (3)   |
| N (1)-S (1)-C (7)    | 107.6 (3)   |
| O (2)-S (2)-N (3)    | 119.7 (3)   |
| O (2)-S (2)-N (4)    | 116.9 (3)   |
| N (3)-S (2)-N (4)    | 98.3 (3)    |
| O (2)-S (2)-C (19)   | 103.8 (3)   |
| N (3)-S (2)-C (19)   | 110.2 (3)   |
| N (4)-S (2)-C (19)   | 107.6 (3)   |
| N (1)-Sn (1)-N (4)   | 94.0 (2)    |
| N (1)-Sn (1)-N (3)   | 92.78 (19)  |
| N (4)-Sn (1)-N (3)   | 61.69 (19)  |
| N (1)-Sn (1)-N (2)   | 61.2 (2)    |
| N (4)-Sn (1)-N (2)   | 94.42 (19)  |
| N (3)-Sn (1)-N (2)   | 144.57 (19) |

---

Symmetry transformations used to generate equivalent atoms:

Table 4. Anisotropic displacement parameters ( $\text{\AA}^2 \times 10^3$ ) for 5. The anisotropic displacement factor exponent takes the form:  $-2 \pi^2 [ h^2 a^{*2} U_{11} + \dots + 2 h k a^* b^* U_{12} ]$

| U12              | U11      | U22    | U33    | U23     | U13     |   |
|------------------|----------|--------|--------|---------|---------|---|
| C (1)<br>0 (3)   | 26 (4)   | 46 (5) | 46 (4) | -18 (4) | 3 (3)   |   |
| C (2)<br>18 (5)  | 46 (5)   | 96 (8) | 73 (7) | -34 (6) | 22 (5)  |   |
| C (3)<br>8 (4)   | 44 (5)   | 51 (5) | 50 (5) | 7 (4)   | -8 (4)  |   |
| C (4)<br>0 (3)   | 38 (4)   | 32 (4) | 33 (4) | -4 (3)  | -5 (3)  |   |
| C (5)<br>17 (4)  | 49 (5)   | 45 (5) | 67 (6) | 4 (4)   | 17 (4)  |   |
| C (6)<br>5 (4)   | 53 (5)   | 44 (5) | 73 (6) | 24 (5)  | 6 (5)   | - |
| C (7)<br>3 (3)   | 26 (3)   | 29 (3) | 21 (3) | -4 (3)  | 3 (3)   | - |
| C (8)<br>10 (3)  | 29 (4)   | 34 (4) | 42 (4) | 3 (3)   | 1 (3)   | - |
| C (9)<br>9 (4)   | 44 (5)   | 37 (5) | 68 (6) | -17 (4) | -19 (4) | - |
| C (10)<br>19 (5) | 67 (6)   | 53 (5) | 42 (5) | -25 (4) | -22 (5) |   |
| C (11)<br>18 (5) | 79 (7)   | 64 (6) | 20 (4) | -10 (4) | 7 (4)   |   |
| C (12)<br>9 (4)  | 46 (4)   | 44 (4) | 29 (4) | -12 (3) | 12 (3)  | - |
| C (13)<br>4 (3)  | 35 (4)   | 27 (3) | 30 (4) | 0 (3)   | 1 (3)   |   |
| C (14)<br>13 (4) | 53 (5)   | 38 (4) | 51 (5) | 2 (4)   | 9 (4)   |   |
| C (15)<br>12 (5) | 72 (6)   | 58 (6) | 40 (5) | 21 (4)  | 24 (4)  |   |
| C (16)<br>16 (3) | 50 (4)   | 37 (4) | 20 (3) | -1 (3)  | -5 (3)  | - |
| C (17)<br>4 (5)  | 90 (8)   | 42 (5) | 47 (5) | 1 (4)   | -23 (5) |   |
| C (18)<br>55 (7) | 129 (10) | 78 (7) | 34 (5) | -9 (5)  | 36 (6)  | - |
| C (19)<br>2 (2)  | 19 (3)   | 26 (3) | 20 (3) | -1 (2)  | 2 (2)   | - |
| C (20)<br>6 (3)  | 27 (3)   | 38 (4) | 33 (4) | -9 (3)  | 11 (3)  | - |
| C (21)<br>4 (3)  | 25 (4)   | 58 (5) | 44 (4) | 12 (4)  | 9 (3)   | - |
| C (22)<br>30 (4) | 40 (4)   | 52 (5) | 48 (5) | 5 (4)   | -7 (4)  | - |
| C (23)<br>18 (4) | 59 (6)   | 43 (5) | 47 (5) | -16 (4) | 7 (4)   | - |

|        |        |        |        |         |        |   |
|--------|--------|--------|--------|---------|--------|---|
| C (24) | 37 (4) | 37 (4) | 34 (4) | -12 (3) | 6 (3)  | - |
| 2 (3)  |        |        |        |         |        |   |
| N (4)  | 25 (3) | 33 (3) | 18 (3) | -2 (2)  | 3 (2)  | - |
| 14 (2) |        |        |        |         |        |   |
| O (1)  | 46 (3) | 74 (4) | 22 (3) | -1 (3)  | 12 (2) | - |
| 18 (3) |        |        |        |         |        |   |
| O (2)  | 25 (2) | 63 (4) | 36 (3) | -25 (3) | 16 (2) |   |
| 1 (2)  |        |        |        |         |        |   |
| N (1)  | 22 (3) | 28 (3) | 34 (3) | -10 (2) | 4 (2)  | - |
| 3 (2)  |        |        |        |         |        |   |
| N (2)  | 27 (3) | 30 (3) | 29 (3) | 2 (2)   | 3 (2)  | - |
| 6 (2)  |        |        |        |         |        |   |
| N (3)  | 24 (3) | 29 (3) | 20 (3) | -3 (2)  | 0 (2)  |   |
| 1 (2)  |        |        |        |         |        |   |
| S (1)  | 26 (1) | 37 (1) | 15 (1) | -4 (1)  | 4 (1)  | - |
| 8 (1)  |        |        |        |         |        |   |
| S (2)  | 16 (1) | 31 (1) | 21 (1) | -6 (1)  | 6 (1)  | - |
| 3 (1)  |        |        |        |         |        |   |
| Sn (1) | 23 (1) | 26 (1) | 22 (1) | -4 (1)  | 6 (1)  | - |
| 2 (1)  |        |        |        |         |        |   |

---

## Crystal data and structure refinement of compound 6

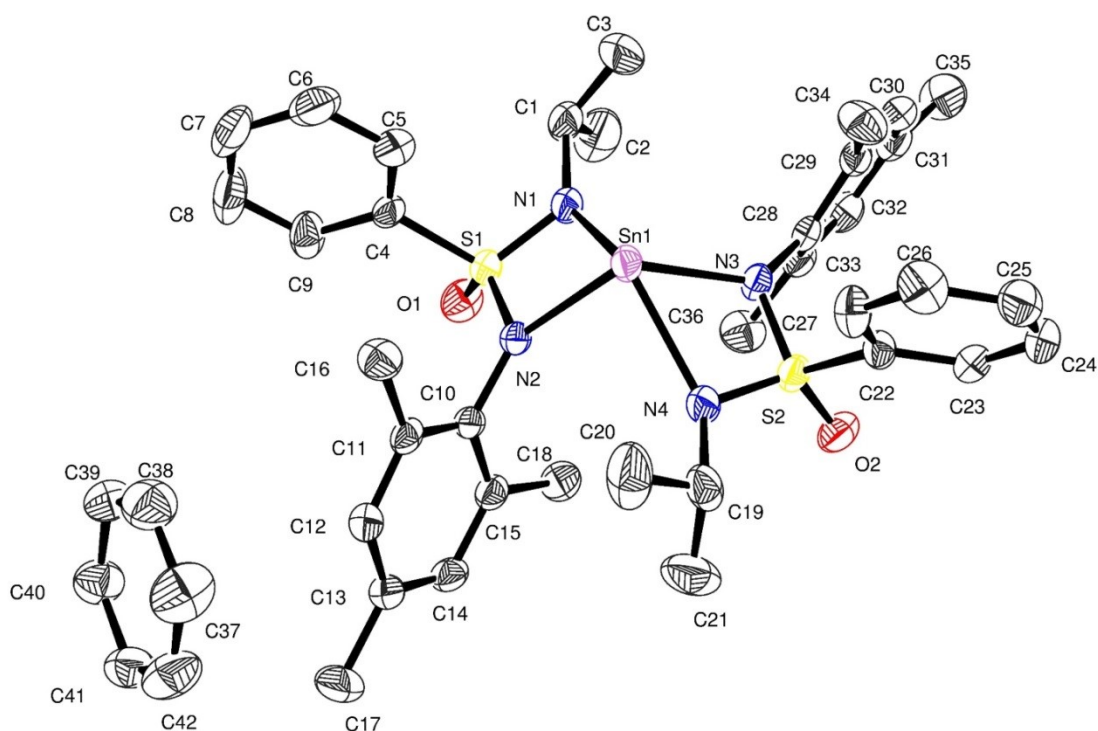

Figure 1 : Asymmetric Unit

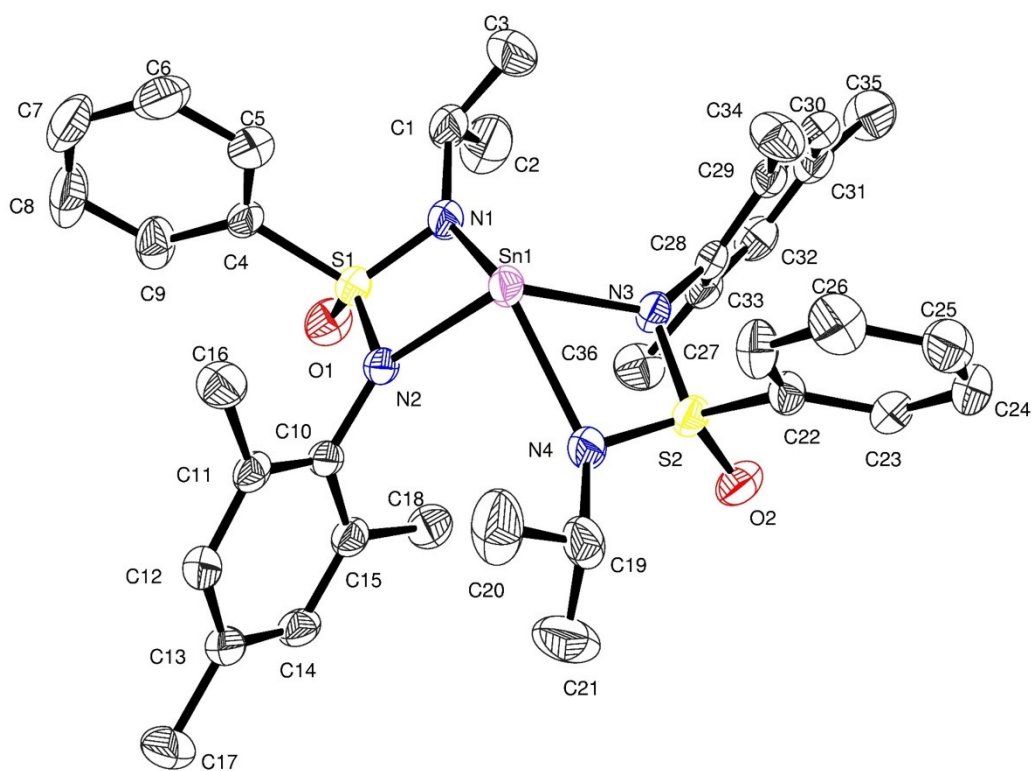

Figure 2 : Molecule

Table 1. Crystal data and structure refinement for 6.

|                                   |                                                                                                                         |
|-----------------------------------|-------------------------------------------------------------------------------------------------------------------------|
| Identification code               | 6                                                                                                                       |
| Empirical formula                 | C <sub>36</sub> H <sub>46</sub> N <sub>4</sub> O <sub>2</sub> S <sub>2</sub> Sn, C <sub>6</sub> H <sub>6</sub>          |
| Formula weight                    | 827.71                                                                                                                  |
| Temperature                       | 193(2) K                                                                                                                |
| Wavelength                        | 0.71073 Å                                                                                                               |
| Crystal system, space group       | Monoclinic, P 2 <sub>1</sub> /c                                                                                         |
| Unit cell dimensions              | a = 15.5421(8) Å    alpha = 90 deg.<br>b = 8.0005(4) Å    beta = 96.144(2) deg.<br>c = 33.9053(16) Å    gamma = 90 deg. |
| Volume                            | 4191.7(4) Å <sup>3</sup>                                                                                                |
| Z, Calculated density             | 4, 1.312 Mg/m <sup>3</sup>                                                                                              |
| Absorption coefficient            | 0.747 mm <sup>-1</sup>                                                                                                  |
| F(000)                            | 1720                                                                                                                    |
| Crystal size                      | 0.200 x 0.080 x 0.060 mm                                                                                                |
| Theta range for data collection   | 1.318 to 26.196 deg.                                                                                                    |
| Limiting indices                  | -19 ≤ h ≤ 19, -9 ≤ k ≤ 9,<br>-42 ≤ l ≤ 42                                                                               |
| Reflections collected / unique    | 93393 / 8354 [R(int) = 0.0739]                                                                                          |
| Completeness to theta = 25.242    | 99.7 %                                                                                                                  |
| Refinement method                 | Full-matrix least-squares on F <sup>2</sup>                                                                             |
| Data / restraints / parameters    | 8354 / 0 / 470                                                                                                          |
| Goodness-of-fit on F <sup>2</sup> | 1.032                                                                                                                   |
| Final R indices [I > 2σ(I)]       | R <sub>1</sub> = 0.0346, wR <sub>2</sub> = 0.0723                                                                       |
| R indices (all data)              | R <sub>1</sub> = 0.0558, wR <sub>2</sub> = 0.0813                                                                       |
| Largest diff. peak and hole       | 0.671 and -0.434 e.Å <sup>-3</sup>                                                                                      |

Table 2. Atomic coordinates ( $\times 10^4$ ) and equivalent isotropic displacement parameters ( $\text{\AA}^2 \times 10^3$ ) for 6.  $U(\text{eq})$  is defined as one third of the trace of the orthogonalized  $U_{ij}$  tensor.

|        | x        | y        | z        | U (eq) |
|--------|----------|----------|----------|--------|
| C (1)  | 4664 (2) | 5284 (5) | 4161 (1) | 50 (1) |
| C (2)  | 4819 (2) | 3541 (6) | 4337 (1) | 71 (1) |
| C (3)  | 4552 (2) | 6563 (6) | 4481 (1) | 73 (1) |
| C (4)  | 4711 (2) | 6272 (4) | 3236 (1) | 32 (1) |
| C (5)  | 4765 (2) | 7899 (4) | 3371 (1) | 47 (1) |
| C (6)  | 5298 (2) | 9022 (5) | 3201 (1) | 60 (1) |
| C (7)  | 5761 (2) | 8495 (6) | 2897 (1) | 62 (1) |
| C (8)  | 5696 (2) | 6885 (6) | 2764 (1) | 59 (1) |
| C (9)  | 5175 (2) | 5743 (4) | 2931 (1) | 42 (1) |
| C (10) | 2683 (2) | 4969 (3) | 2857 (1) | 26 (1) |
| C (11) | 2643 (2) | 6209 (3) | 2566 (1) | 28 (1) |
| C (12) | 2257 (2) | 5828 (4) | 2186 (1) | 34 (1) |
| C (13) | 1924 (2) | 4262 (4) | 2091 (1) | 37 (1) |
| C (14) | 1963 (2) | 3064 (4) | 2386 (1) | 36 (1) |
| C (15) | 2326 (2) | 3387 (3) | 2773 (1) | 30 (1) |
| C (16) | 3001 (2) | 7948 (4) | 2645 (1) | 39 (1) |
| C (17) | 1534 (3) | 3882 (5) | 1673 (1) | 61 (1) |
| C (18) | 2293 (2) | 2078 (4) | 3091 (1) | 42 (1) |
| C (19) | 444 (2)  | 6069 (5) | 3300 (1) | 46 (1) |
| C (20) | 659 (2)  | 7520 (6) | 3037 (1) | 76 (1) |
| C (21) | 156 (2)  | 4505 (6) | 3064 (1) | 76 (1) |
| C (22) | 412 (2)  | 6531 (4) | 4237 (1) | 31 (1) |
| C (23) | -144 (2) | 5997 (4) | 4503 (1) | 38 (1) |
| C (24) | -617 (2) | 7159 (5) | 4692 (1) | 46 (1) |
| C (25) | -538 (2) | 8832 (5) | 4616 (1) | 47 (1) |
| C (26) | 25 (2)   | 9381 (4) | 4352 (1) | 48 (1) |
| C (27) | 499 (2)  | 8224 (4) | 4162 (1) | 40 (1) |
| C (28) | 2317 (2) | 4465 (3) | 4571 (1) | 26 (1) |
| C (29) | 2422 (2) | 5445 (3) | 4915 (1) | 30 (1) |
| C (30) | 2724 (2) | 4699 (4) | 5274 (1) | 35 (1) |
| C (31) | 2922 (2) | 3017 (4) | 5300 (1) | 37 (1) |
| C (32) | 2840 (2) | 2083 (4) | 4955 (1) | 38 (1) |
| C (33) | 2549 (2) | 2765 (3) | 4587 (1) | 31 (1) |
| C (34) | 2221 (2) | 7301 (4) | 4906 (1) | 46 (1) |
| C (35) | 3205 (2) | 2212 (5) | 5697 (1) | 54 (1) |
| C (36) | 2519 (2) | 1712 (4) | 4219 (1) | 46 (1) |
| C (37) | 1878 (2) | 9386 (5) | 1321 (1) | 66 (1) |
| C (38) | 2732 (2) | 9572 (5) | 1469 (1) | 57 (1) |
| C (39) | 3330 (2) | 8393 (4) | 1391 (1) | 48 (1) |
| C (40) | 3073 (2) | 7043 (4) | 1159 (1) | 47 (1) |
| C (41) | 2224 (2) | 6855 (4) | 1010 (1) | 47 (1) |
| C (42) | 1628 (2) | 8023 (5) | 1090 (1) | 59 (1) |
| N (1)  | 3882 (2) | 5330 (3) | 3868 (1) | 34 (1) |
| N (2)  | 3026 (1) | 5351 (3) | 3257 (1) | 27 (1) |



|       |         |         |         |       |
|-------|---------|---------|---------|-------|
| N(3)  | 2033(1) | 5209(3) | 4196(1) | 28(1) |
| N(4)  | 1207(1) | 5725(3) | 3587(1) | 34(1) |
| O(1)  | 4272(1) | 3216(3) | 3333(1) | 42(1) |
| O(2)  | 645(1)  | 3468(2) | 4049(1) | 41(1) |
| S(1)  | 3973(1) | 4859(1) | 3431(1) | 30(1) |
| S(2)  | 1066(1) | 5057(1) | 4006(1) | 30(1) |
| Sn(1) | 2593(1) | 6853(1) | 3753(1) | 29(1) |

---

Table 3. Bond lengths [Å] and angles [deg] for 6.

---

|              |          |
|--------------|----------|
| C(1)-N(1)    | 1.485(4) |
| C(1)-C(3)    | 1.515(5) |
| C(1)-C(2)    | 1.526(5) |
| C(1)-H(1)    | 1.0000   |
| C(2)-H(2A)   | 0.9800   |
| C(2)-H(2B)   | 0.9800   |
| C(2)-H(2C)   | 0.9800   |
| C(3)-H(3A)   | 0.9800   |
| C(3)-H(3B)   | 0.9800   |
| C(3)-H(3C)   | 0.9800   |
| C(4)-C(5)    | 1.379(4) |
| C(4)-C(9)    | 1.388(4) |
| C(4)-S(1)    | 1.786(3) |
| C(5)-C(6)    | 1.388(5) |
| C(5)-H(5)    | 0.9500   |
| C(6)-C(7)    | 1.383(5) |
| C(6)-H(6)    | 0.9500   |
| C(7)-C(8)    | 1.364(5) |
| C(7)-H(7)    | 0.9500   |
| C(8)-C(9)    | 1.382(5) |
| C(8)-H(8)    | 0.9500   |
| C(9)-H(9)    | 0.9500   |
| C(10)-C(11)  | 1.398(4) |
| C(10)-C(15)  | 1.399(4) |
| C(10)-N(2)   | 1.435(3) |
| C(11)-C(12)  | 1.394(4) |
| C(11)-C(16)  | 1.512(4) |
| C(12)-C(13)  | 1.381(4) |
| C(12)-H(12)  | 0.9500   |
| C(13)-C(14)  | 1.382(4) |
| C(13)-C(17)  | 1.513(4) |
| C(14)-C(15)  | 1.396(4) |
| C(14)-H(14)  | 0.9500   |
| C(15)-C(18)  | 1.507(4) |
| C(16)-H(16A) | 0.9800   |
| C(16)-H(16B) | 0.9800   |
| C(16)-H(16C) | 0.9800   |
| C(17)-H(17A) | 0.9800   |
| C(17)-H(17B) | 0.9800   |
| C(17)-H(17C) | 0.9800   |
| C(18)-H(18A) | 0.9800   |
| C(18)-H(18B) | 0.9800   |
| C(18)-H(18C) | 0.9800   |
| C(19)-N(4)   | 1.477(4) |
| C(19)-C(20)  | 1.522(5) |
| C(19)-C(21)  | 1.525(5) |
| C(19)-H(19)  | 1.0000   |
| C(20)-H(20A) | 0.9800   |
| C(20)-H(20B) | 0.9800   |
| C(20)-H(20C) | 0.9800   |
| C(21)-H(21A) | 0.9800   |
| C(21)-H(21B) | 0.9800   |
| C(21)-H(21C) | 0.9800   |
| C(22)-C(23)  | 1.380(4) |

|                     |           |
|---------------------|-----------|
| C (22) -C (27)      | 1.387 (4) |
| C (22) -S (2)       | 1.791 (3) |
| C (23) -C (24)      | 1.385 (4) |
| C (23) -H (23)      | 0.9500    |
| C (24) -C (25)      | 1.371 (5) |
| C (24) -H (24)      | 0.9500    |
| C (25) -C (26)      | 1.390 (5) |
| C (25) -H (25)      | 0.9500    |
| C (26) -C (27)      | 1.384 (4) |
| C (26) -H (26)      | 0.9500    |
| C (27) -H (27)      | 0.9500    |
| C (28) -C (29)      | 1.401 (4) |
| C (28) -C (33)      | 1.407 (4) |
| C (28) -N (3)       | 1.431 (3) |
| C (29) -C (30)      | 1.391 (4) |
| C (29) -C (34)      | 1.517 (4) |
| C (30) -C (31)      | 1.381 (4) |
| C (30) -H (30)      | 0.9500    |
| C (31) -C (32)      | 1.383 (4) |
| C (31) -C (35)      | 1.514 (4) |
| C (32) -C (33)      | 1.393 (4) |
| C (32) -H (32)      | 0.9500    |
| C (33) -C (36)      | 1.503 (4) |
| C (34) -H (34A)     | 0.9800    |
| C (34) -H (34B)     | 0.9800    |
| C (34) -H (34C)     | 0.9800    |
| C (35) -H (35A)     | 0.9800    |
| C (35) -H (35B)     | 0.9800    |
| C (35) -H (35C)     | 0.9800    |
| C (36) -H (36A)     | 0.9800    |
| C (36) -H (36B)     | 0.9800    |
| C (36) -H (36C)     | 0.9800    |
| C (37) -C (42)      | 1.373 (5) |
| C (37) -C (38)      | 1.376 (5) |
| C (37) -H (37)      | 0.9500    |
| C (38) -C (39)      | 1.370 (5) |
| C (38) -H (38)      | 0.9500    |
| C (39) -C (40)      | 1.370 (4) |
| C (39) -H (39)      | 0.9500    |
| C (40) -C (41)      | 1.369 (4) |
| C (40) -H (40)      | 0.9500    |
| C (41) -C (42)      | 1.362 (5) |
| C (41) -H (41)      | 0.9500    |
| C (42) -H (42)      | 0.9500    |
| N (1) -S (1)        | 1.553 (2) |
| N (1) -Sn (1)       | 2.342 (2) |
| N (2) -S (1)        | 1.576 (2) |
| N (2) -Sn (1)       | 2.229 (2) |
| N (3) -S (2)        | 1.576 (2) |
| N (3) -Sn (1)       | 2.240 (2) |
| N (4) -S (2)        | 1.558 (2) |
| N (4) -Sn (1)       | 2.347 (2) |
| O (1) -S (1)        | 1.444 (2) |
| O (2) -S (2)        | 1.443 (2) |
| N (1) -C (1) -C (3) | 108.2 (3) |
| N (1) -C (1) -C (2) | 111.5 (3) |
| C (3) -C (1) -C (2) | 111.3 (3) |

|                     |          |
|---------------------|----------|
| N(1)-C(1)-H(1)      | 108.6    |
| C(3)-C(1)-H(1)      | 108.6    |
| C(2)-C(1)-H(1)      | 108.6    |
| C(1)-C(2)-H(2A)     | 109.5    |
| C(1)-C(2)-H(2B)     | 109.5    |
| H(2A)-C(2)-H(2B)    | 109.5    |
| C(1)-C(2)-H(2C)     | 109.5    |
| H(2A)-C(2)-H(2C)    | 109.5    |
| H(2B)-C(2)-H(2C)    | 109.5    |
| C(1)-C(3)-H(3A)     | 109.5    |
| C(1)-C(3)-H(3B)     | 109.5    |
| H(3A)-C(3)-H(3B)    | 109.5    |
| C(1)-C(3)-H(3C)     | 109.5    |
| H(3A)-C(3)-H(3C)    | 109.5    |
| H(3B)-C(3)-H(3C)    | 109.5    |
| C(5)-C(4)-C(9)      | 121.0(3) |
| C(5)-C(4)-S(1)      | 119.6(2) |
| C(9)-C(4)-S(1)      | 119.2(2) |
| C(4)-C(5)-C(6)      | 119.5(3) |
| C(4)-C(5)-H(5)      | 120.3    |
| C(6)-C(5)-H(5)      | 120.3    |
| C(7)-C(6)-C(5)      | 119.5(4) |
| C(7)-C(6)-H(6)      | 120.3    |
| C(5)-C(6)-H(6)      | 120.3    |
| C(8)-C(7)-C(6)      | 120.5(3) |
| C(8)-C(7)-H(7)      | 119.7    |
| C(6)-C(7)-H(7)      | 119.7    |
| C(7)-C(8)-C(9)      | 121.0(4) |
| C(7)-C(8)-H(8)      | 119.5    |
| C(9)-C(8)-H(8)      | 119.5    |
| C(8)-C(9)-C(4)      | 118.6(3) |
| C(8)-C(9)-H(9)      | 120.7    |
| C(4)-C(9)-H(9)      | 120.7    |
| C(11)-C(10)-C(15)   | 120.7(2) |
| C(11)-C(10)-N(2)    | 120.1(2) |
| C(15)-C(10)-N(2)    | 119.0(2) |
| C(12)-C(11)-C(10)   | 118.7(3) |
| C(12)-C(11)-C(16)   | 118.7(3) |
| C(10)-C(11)-C(16)   | 122.6(2) |
| C(13)-C(12)-C(11)   | 121.8(3) |
| C(13)-C(12)-H(12)   | 119.1    |
| C(11)-C(12)-H(12)   | 119.1    |
| C(12)-C(13)-C(14)   | 118.3(3) |
| C(12)-C(13)-C(17)   | 120.2(3) |
| C(14)-C(13)-C(17)   | 121.4(3) |
| C(13)-C(14)-C(15)   | 122.3(3) |
| C(13)-C(14)-H(14)   | 118.9    |
| C(15)-C(14)-H(14)   | 118.9    |
| C(14)-C(15)-C(10)   | 118.1(3) |
| C(14)-C(15)-C(18)   | 120.1(3) |
| C(10)-C(15)-C(18)   | 121.7(2) |
| C(11)-C(16)-H(16A)  | 109.5    |
| C(11)-C(16)-H(16B)  | 109.5    |
| H(16A)-C(16)-H(16B) | 109.5    |
| C(11)-C(16)-H(16C)  | 109.5    |
| H(16A)-C(16)-H(16C) | 109.5    |
| H(16B)-C(16)-H(16C) | 109.5    |
| C(13)-C(17)-H(17A)  | 109.5    |

|                          |           |
|--------------------------|-----------|
| C (13) -C (17) -H (17B)  | 109.5     |
| H (17A) -C (17) -H (17B) | 109.5     |
| C (13) -C (17) -H (17C)  | 109.5     |
| H (17A) -C (17) -H (17C) | 109.5     |
| H (17B) -C (17) -H (17C) | 109.5     |
| C (15) -C (18) -H (18A)  | 109.5     |
| C (15) -C (18) -H (18B)  | 109.5     |
| H (18A) -C (18) -H (18B) | 109.5     |
| C (15) -C (18) -H (18C)  | 109.5     |
| H (18A) -C (18) -H (18C) | 109.5     |
| H (18B) -C (18) -H (18C) | 109.5     |
| N (4) -C (19) -C (20)    | 108.4 (3) |
| N (4) -C (19) -C (21)    | 111.2 (3) |
| C (20) -C (19) -C (21)   | 113.0 (3) |
| N (4) -C (19) -H (19)    | 108.0     |
| C (20) -C (19) -H (19)   | 108.0     |
| C (21) -C (19) -H (19)   | 108.0     |
| C (19) -C (20) -H (20A)  | 109.5     |
| C (19) -C (20) -H (20B)  | 109.5     |
| H (20A) -C (20) -H (20B) | 109.5     |
| C (19) -C (20) -H (20C)  | 109.5     |
| H (20A) -C (20) -H (20C) | 109.5     |
| H (20B) -C (20) -H (20C) | 109.5     |
| C (19) -C (21) -H (21A)  | 109.5     |
| C (19) -C (21) -H (21B)  | 109.5     |
| H (21A) -C (21) -H (21B) | 109.5     |
| C (19) -C (21) -H (21C)  | 109.5     |
| H (21A) -C (21) -H (21C) | 109.5     |
| H (21B) -C (21) -H (21C) | 109.5     |
| C (23) -C (22) -C (27)   | 120.1 (3) |
| C (23) -C (22) -S (2)    | 120.3 (2) |
| C (27) -C (22) -S (2)    | 119.4 (2) |
| C (22) -C (23) -C (24)   | 119.6 (3) |
| C (22) -C (23) -H (23)   | 120.2     |
| C (24) -C (23) -H (23)   | 120.2     |
| C (25) -C (24) -C (23)   | 120.5 (3) |
| C (25) -C (24) -H (24)   | 119.8     |
| C (23) -C (24) -H (24)   | 119.8     |
| C (24) -C (25) -C (26)   | 120.3 (3) |
| C (24) -C (25) -H (25)   | 119.9     |
| C (26) -C (25) -H (25)   | 119.9     |
| C (27) -C (26) -C (25)   | 119.5 (3) |
| C (27) -C (26) -H (26)   | 120.3     |
| C (25) -C (26) -H (26)   | 120.3     |
| C (26) -C (27) -C (22)   | 120.0 (3) |
| C (26) -C (27) -H (27)   | 120.0     |
| C (22) -C (27) -H (27)   | 120.0     |
| C (29) -C (28) -C (33)   | 120.2 (3) |
| C (29) -C (28) -N (3)    | 120.4 (2) |
| C (33) -C (28) -N (3)    | 119.3 (2) |
| C (30) -C (29) -C (28)   | 119.1 (3) |
| C (30) -C (29) -C (34)   | 119.2 (3) |
| C (28) -C (29) -C (34)   | 121.7 (3) |
| C (31) -C (30) -C (29)   | 121.8 (3) |
| C (31) -C (30) -H (30)   | 119.1     |
| C (29) -C (30) -H (30)   | 119.1     |
| C (30) -C (31) -C (32)   | 118.2 (3) |
| C (30) -C (31) -C (35)   | 120.9 (3) |

|                          |             |
|--------------------------|-------------|
| C (32) -C (31) -C (35)   | 120.9 (3)   |
| C (31) -C (32) -C (33)   | 122.6 (3)   |
| C (31) -C (32) -H (32)   | 118.7       |
| C (33) -C (32) -H (32)   | 118.7       |
| C (32) -C (33) -C (28)   | 118.1 (3)   |
| C (32) -C (33) -C (36)   | 120.2 (3)   |
| C (28) -C (33) -C (36)   | 121.7 (3)   |
| C (29) -C (34) -H (34A)  | 109.5       |
| C (29) -C (34) -H (34B)  | 109.5       |
| H (34A) -C (34) -H (34B) | 109.5       |
| C (29) -C (34) -H (34C)  | 109.5       |
| H (34A) -C (34) -H (34C) | 109.5       |
| H (34B) -C (34) -H (34C) | 109.5       |
| C (31) -C (35) -H (35A)  | 109.5       |
| C (31) -C (35) -H (35B)  | 109.5       |
| H (35A) -C (35) -H (35B) | 109.5       |
| C (31) -C (35) -H (35C)  | 109.5       |
| H (35A) -C (35) -H (35C) | 109.5       |
| H (35B) -C (35) -H (35C) | 109.5       |
| C (33) -C (36) -H (36A)  | 109.5       |
| C (33) -C (36) -H (36B)  | 109.5       |
| H (36A) -C (36) -H (36B) | 109.5       |
| C (33) -C (36) -H (36C)  | 109.5       |
| H (36A) -C (36) -H (36C) | 109.5       |
| H (36B) -C (36) -H (36C) | 109.5       |
| C (42) -C (37) -C (38)   | 119.8 (4)   |
| C (42) -C (37) -H (37)   | 120.1       |
| C (38) -C (37) -H (37)   | 120.1       |
| C (39) -C (38) -C (37)   | 120.1 (3)   |
| C (39) -C (38) -H (38)   | 119.9       |
| C (37) -C (38) -H (38)   | 119.9       |
| C (38) -C (39) -C (40)   | 119.4 (3)   |
| C (38) -C (39) -H (39)   | 120.3       |
| C (40) -C (39) -H (39)   | 120.3       |
| C (41) -C (40) -C (39)   | 120.6 (3)   |
| C (41) -C (40) -H (40)   | 119.7       |
| C (39) -C (40) -H (40)   | 119.7       |
| C (42) -C (41) -C (40)   | 120.0 (3)   |
| C (42) -C (41) -H (41)   | 120.0       |
| C (40) -C (41) -H (41)   | 120.0       |
| C (41) -C (42) -C (37)   | 120.0 (3)   |
| C (41) -C (42) -H (42)   | 120.0       |
| C (37) -C (42) -H (42)   | 120.0       |
| C (1) -N (1) -S (1)      | 118.7 (2)   |
| C (1) -N (1) -Sn (1)     | 138.5 (2)   |
| S (1) -N (1) -Sn (1)     | 97.52 (11)  |
| C (10) -N (2) -S (1)     | 122.49 (17) |
| C (10) -N (2) -Sn (1)    | 135.72 (17) |
| S (1) -N (2) -Sn (1)     | 101.43 (10) |
| C (28) -N (3) -S (2)     | 121.33 (18) |
| C (28) -N (3) -Sn (1)    | 137.33 (17) |
| S (2) -N (3) -Sn (1)     | 101.20 (11) |
| C (19) -N (4) -S (2)     | 118.9 (2)   |
| C (19) -N (4) -Sn (1)    | 137.6 (2)   |
| S (2) -N (4) -Sn (1)     | 97.36 (11)  |
| O (1) -S (1) -N (1)      | 120.28 (13) |
| O (1) -S (1) -N (2)      | 116.90 (12) |
| N (1) -S (1) -N (2)      | 96.85 (12)  |

|                 |            |
|-----------------|------------|
| O(1)-S(1)-C(4)  | 104.88(14) |
| N(1)-S(1)-C(4)  | 109.11(14) |
| N(2)-S(1)-C(4)  | 108.34(13) |
| O(2)-S(2)-N(4)  | 120.18(13) |
| O(2)-S(2)-N(3)  | 116.75(12) |
| N(4)-S(2)-N(3)  | 97.10(12)  |
| O(2)-S(2)-C(22) | 104.64(13) |
| N(4)-S(2)-C(22) | 108.40(13) |
| N(3)-S(2)-C(22) | 109.42(13) |
| N(2)-Sn(1)-N(3) | 111.06(8)  |
| N(2)-Sn(1)-N(1) | 61.54(8)   |
| N(3)-Sn(1)-N(1) | 88.24(8)   |
| N(2)-Sn(1)-N(4) | 87.40(8)   |
| N(3)-Sn(1)-N(4) | 61.55(8)   |
| N(1)-Sn(1)-N(4) | 125.94(9)  |

---

Symmetry transformations used to generate equivalent atoms:

Table 4. Anisotropic displacement parameters ( $\text{\AA}^2 \times 10^3$ ) for 6. The anisotropic displacement factor exponent takes the form:  $-2 \pi^2 [ h^2 a^{*2} U_{11} + \dots + 2 h k a^* b^* U_{12} ]$

| U12    | U11    | U22     | U33    | U23     | U13     |   |
|--------|--------|---------|--------|---------|---------|---|
| C (1)  | 28 (2) | 88 (3)  | 34 (2) | 2 (2)   | 3 (1)   | - |
| 13 (2) |        |         |        |         |         |   |
| C (2)  | 45 (2) | 109 (4) | 57 (2) | 33 (2)  | -6 (2)  | - |
| 1 (2)  |        |         |        |         |         |   |
| C (3)  | 50 (2) | 131 (4) | 39 (2) | -21 (2) | 2 (2)   | - |
| 20 (2) |        |         |        |         |         |   |
| C (4)  | 20 (2) | 48 (2)  | 27 (2) | 5 (1)   | -1 (1)  | - |
| 7 (1)  |        |         |        |         |         |   |
| C (5)  | 44 (2) | 58 (2)  | 39 (2) | -2 (2)  | 4 (2)   | - |
| 19 (2) |        |         |        |         |         |   |
| C (6)  | 55 (2) | 66 (3)  | 53 (2) | 10 (2)  | -10 (2) | - |
| 31 (2) |        |         |        |         |         |   |
| C (7)  | 34 (2) | 95 (3)  | 57 (2) | 33 (2)  | 1 (2)   | - |
| 21 (2) |        |         |        |         |         |   |
| C (8)  | 33 (2) | 96 (3)  | 52 (2) | 27 (2)  | 17 (2)  |   |
| 6 (2)  |        |         |        |         |         |   |
| C (9)  | 27 (2) | 63 (2)  | 39 (2) | 10 (2)  | 9 (1)   |   |
| 10 (2) |        |         |        |         |         |   |
| C (10) | 19 (1) | 33 (2)  | 27 (2) | -7 (1)  | 5 (1)   |   |
| 0 (1)  |        |         |        |         |         |   |
| C (11) | 21 (1) | 29 (2)  | 36 (2) | -6 (1)  | 10 (1)  |   |
| 0 (1)  |        |         |        |         |         |   |
| C (12) | 30 (2) | 42 (2)  | 30 (2) | 0 (1)   | 7 (1)   | - |
| 2 (1)  |        |         |        |         |         |   |
| C (13) | 31 (2) | 47 (2)  | 32 (2) | -9 (1)  | 7 (1)   | - |
| 9 (1)  |        |         |        |         |         |   |
| C (14) | 31 (2) | 36 (2)  | 41 (2) | -14 (2) | 8 (1)   | - |
| 10 (1) |        |         |        |         |         |   |
| C (15) | 25 (2) | 31 (2)  | 35 (2) | -4 (1)  | 8 (1)   | - |
| 2 (1)  |        |         |        |         |         |   |
| C (16) | 47 (2) | 31 (2)  | 40 (2) | 0 (1)   | 3 (2)   | - |
| 4 (1)  |        |         |        |         |         |   |
| C (17) | 71 (3) | 71 (3)  | 38 (2) | -11 (2) | -3 (2)  | - |
| 33 (2) |        |         |        |         |         |   |
| C (18) | 45 (2) | 34 (2)  | 45 (2) | -1 (2)  | 7 (2)   | - |
| 10 (1) |        |         |        |         |         |   |
| C (19) | 31 (2) | 78 (3)  | 30 (2) | 0 (2)   | 5 (1)   |   |
| 14 (2) |        |         |        |         |         |   |
| C (20) | 50 (2) | 125 (4) | 52 (2) | 37 (2)  | 10 (2)  |   |
| 20 (2) |        |         |        |         |         |   |
| C (21) | 44 (2) | 124 (4) | 57 (2) | -37 (3) | -13 (2) |   |
| 16 (2) |        |         |        |         |         |   |
| C (22) | 26 (2) | 40 (2)  | 29 (2) | -2 (1)  | 7 (1)   |   |
| 3 (1)  |        |         |        |         |         |   |
| C (23) | 28 (2) | 48 (2)  | 39 (2) | -5 (2)  | 7 (1)   | - |
| 8 (1)  |        |         |        |         |         |   |



|        |        |        |        |        |         |        |   |
|--------|--------|--------|--------|--------|---------|--------|---|
| 5 (2)  | C (24) | 30 (2) | 68 (3) | 43 (2) | -9 (2)  | 14 (2) | - |
| 13 (2) | C (25) | 33 (2) | 62 (2) | 46 (2) | -13 (2) | 5 (2)  |   |
| 15 (2) | C (26) | 50 (2) | 44 (2) | 49 (2) | 2 (2)   | 4 (2)  |   |
| 9 (2)  | C (27) | 40 (2) | 42 (2) | 40 (2) | 6 (2)   | 15 (1) |   |
| 3 (1)  | C (28) | 21 (1) | 28 (1) | 31 (2) | 4 (1)   | 8 (1)  | - |
| 6 (1)  | C (29) | 30 (2) | 28 (2) | 33 (2) | -2 (1)  | 10 (1) | - |
| 9 (1)  | C (30) | 32 (2) | 38 (2) | 34 (2) | -2 (1)  | 5 (1)  | - |
| 7 (1)  | C (31) | 30 (2) | 41 (2) | 39 (2) | 11 (2)  | 4 (1)  | - |
| 2 (1)  | C (32) | 35 (2) | 27 (2) | 51 (2) | 6 (2)   | 7 (2)  | - |
| 3 (1)  | C (33) | 28 (2) | 25 (2) | 40 (2) | -2 (1)  | 9 (1)  | - |
| 1 (2)  | C (34) | 68 (2) | 28 (2) | 41 (2) | -7 (1)  | 6 (2)  | - |
| 6 (2)  | C (35) | 57 (2) | 56 (2) | 47 (2) | 20 (2)  | -2 (2) | - |
| 5 (2)  | C (36) | 51 (2) | 33 (2) | 54 (2) | -10 (2) | 6 (2)  |   |
| 15 (2) | C (37) | 48 (2) | 59 (2) | 93 (3) | -6 (2)  | 9 (2)  |   |
| 4 (2)  | C (38) | 59 (3) | 52 (2) | 60 (2) | -12 (2) | 7 (2)  | - |
| 5 (2)  | C (39) | 33 (2) | 60 (2) | 48 (2) | 0 (2)   | -1 (2) | - |
| 5 (2)  | C (40) | 39 (2) | 50 (2) | 50 (2) | -2 (2)  | -1 (2) |   |
| 5 (2)  | C (41) | 46 (2) | 47 (2) | 44 (2) | 3 (2)   | -8 (2) | - |
| 2 (2)  | C (42) | 35 (2) | 63 (3) | 76 (3) | 8 (2)   | -8 (2) | - |
| 3 (1)  | N (1)  | 24 (1) | 52 (2) | 27 (1) | 0 (1)   | 5 (1)  | - |
| 0 (1)  | N (2)  | 21 (1) | 32 (1) | 27 (1) | -6 (1)  | 6 (1)  |   |
| 1 (1)  | N (3)  | 22 (1) | 33 (1) | 31 (1) | 3 (1)   | 7 (1)  | - |
| 2 (1)  | N (4)  | 25 (1) | 49 (2) | 29 (1) | -3 (1)  | 5 (1)  |   |
| 7 (1)  | O (1)  | 32 (1) | 41 (1) | 54 (1) | -2 (1)  | 7 (1)  |   |
| 8 (1)  | O (2)  | 31 (1) | 38 (1) | 55 (1) | -5 (1)  | 9 (1)  | - |
| 2 (1)  | S (1)  | 23 (1) | 37 (1) | 31 (1) | -1 (1)  | 6 (1)  | - |
| 2 (1)  | S (2)  | 25 (1) | 33 (1) | 34 (1) | -3 (1)  | 8 (1)  | - |
| 3 (1)  | Sn (1) | 32 (1) | 28 (1) | 28 (1) | -4 (1)  | 10 (1) | - |

---

## Calculations

Calculations were performed with the Gaussian 09 suite of programs<sup>5</sup> using the density functional method B3LYP with dispersion (D3).<sup>6,7</sup> Tin atom was treated with a Stuttgart-Dresden pseudopotential in combination with its adapted basis set.<sup>8</sup> All other atoms have been described with a 6-31G(d,p) basis set. Geometry optimisations were carried out without any symmetry restrictions. Frequency calculations were undertaken to confirm the nature of the stationary points, yielding one imaginary frequency for transition states (TS) and all of them positive for *minima*. The connectivity of the transition states and their adjacent *minima* was confirmed by intrinsic reaction coordinate (IRC) calculations.<sup>9,10</sup>

The electron density of the optimized structures was subjected to an Atoms-In Molecules analysis (QTAIM analysis)<sup>11,12,13</sup> using AIMAll software.<sup>14</sup>

- <sup>5</sup> **Gaussian 09, Revision D.01**, M. J. Frisch, G. W. Trucks, H. B. Schlegel, G. E. Scuseria, M. A. Robb, J. R. Cheeseman, G. Scalmani, V. Barone, G. A. Petersson, H. Nakatsuji, X. Li, M. Caricato, A. Marenich, J. Bloino, B. G. Janesko, R. Gomperts, B. Mennucci, H. P. Hratchian, J. V. Ortiz, A. F. Izmaylov, J. L. Sonnenberg, D. Williams-Young, F. Ding, F. Lipparini, F. Egidi, J. Goings, B. Peng, A. Petrone, T. Henderson, D. Ranasinghe, V. G. Zakrzewski, J. Gao, N. Rega, G. Zheng, W. Liang, M. Hada, M. Ehara, K. Toyota, R. Fukuda, J. Hasegawa, M. Ishida, T. Nakajima, Y. Honda, O. Kitao, H. Nakai, T. Vreven, K. Throssell, J. A. Montgomery, Jr., J. E. Peralta, F. Ogliaro, M. Bearpark, J. J. Heyd, E. Brothers, K. N. Kudin, V. N. Staroverov, T. Keith, R. Kobayashi, J. Normand, K. Raghavachari, A. Rendell, J. C. Burant, S. S. Iyengar, J. Tomasi, M. Cossi, J. M. Millam, M. Klene, C. Adamo, R. Cammi, J. W. Ochterski, R. L. Martin, K. Morokuma, O. Farkas, J. B. Foresman, and D. J. Fox, Gaussian, Inc., Wallingford CT, **2016**.
- <sup>6</sup> a) A. D. Becke, *Phys. Rev. A* **1988**, *38*, 3098-3100; b) A. D. Becke, *J. Chem. Phys.* **1993**, *98*, 5648-5652; c) C. Lee, W. Yang, R. G. Parr, *Phys. Rev. B* **1988**, *37*, 785-789.
- <sup>7</sup> S. Grimme, "Semiempirical GGA-type density functional constructed with a long-range dispersion correction," *J. Comp. Chem.*, **27** (2006) 1787-1799.
- <sup>8</sup> D. Andrae, U. Häussermann, M. Dolg, H. Stoll, H. Preuss, *Theor. Chim. Acta.* **1990**, *77*, 123-141.
- <sup>9</sup> K. Fukui, *Acc. Chem. Res.* **1981**, *14*, 363-368.
- <sup>10</sup> H. P. Hratchian, H. B. Schlegel, *In Theory and Applications of Computational Chemistry: The First 40 Years*, Eds D. C. E. Dykstra, G. Frenking, K. S. Kim, G. Scuseria. Elsevier., Amsterdam, **2005**.
- <sup>11</sup> R. F. W. Bader, *In Atoms in Molecules A Quantum Theory*, Clarendon Press., Oxford, **1990**.
- <sup>12</sup> R. F. W. Bader, *Chem. Rev.* **1991**, *91*, 893-928.
- <sup>13</sup> R. F. W. Bader, *Acc. Chem. Res.* **1985**, *18*, 9-15.
- <sup>14</sup> AIMAll (Version 10.10.11), Todd A. Keith, **2010** (aim.tkgristmill.com).

## Coordinates:

### Compound 3

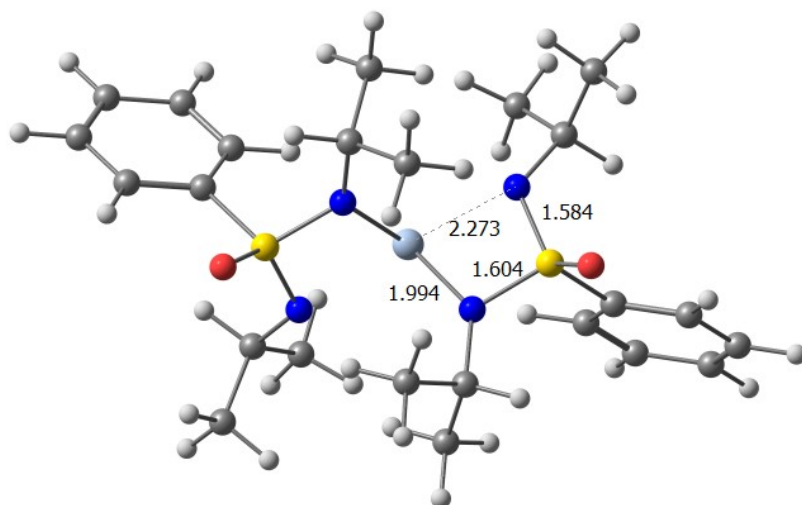

|    |                 |                 |                 |
|----|-----------------|-----------------|-----------------|
| C  | 3.785826000000  | -0.215125000000 | -0.277808000000 |
| C  | 5.122900000000  | -0.058937000000 | 0.078807000000  |
| H  | 5.365204000000  | 0.421145000000  | 1.019747000000  |
| C  | 6.115246000000  | -0.535591000000 | -0.779432000000 |
| H  | 7.160447000000  | -0.422139000000 | -0.509837000000 |
| C  | 5.763670000000  | -1.157728000000 | -1.976951000000 |
| H  | 6.537007000000  | -1.528736000000 | -2.642291000000 |
| C  | 4.417668000000  | -1.309268000000 | -2.322852000000 |
| H  | 4.145954000000  | -1.798173000000 | -3.253010000000 |
| C  | 3.419484000000  | -0.838678000000 | -1.473970000000 |
| H  | 2.371844000000  | -0.963633000000 | -1.735526000000 |
| C  | 1.479117000000  | -1.897483000000 | 1.710203000000  |
| H  | 2.469884000000  | -1.859193000000 | 2.180606000000  |
| C  | 0.423827000000  | -1.916154000000 | 2.815268000000  |
| H  | 0.506507000000  | -1.014206000000 | 3.424858000000  |
| H  | 0.565928000000  | -2.786771000000 | 3.464348000000  |
| H  | -0.579774000000 | -1.962172000000 | 2.391202000000  |
| C  | 1.401394000000  | -3.127161000000 | 0.804948000000  |
| H  | 0.424833000000  | -3.152129000000 | 0.318155000000  |
| H  | 1.522987000000  | -4.048839000000 | 1.382579000000  |
| H  | 2.179169000000  | -3.094007000000 | 0.036673000000  |
| C  | 2.279228000000  | 2.466268000000  | -0.867517000000 |
| H  | 3.250885000000  | 2.083648000000  | -1.212419000000 |
| C  | 2.519379000000  | 3.802087000000  | -0.159188000000 |
| H  | 1.572336000000  | 4.238795000000  | 0.171452000000  |
| H  | 3.013973000000  | 4.515152000000  | -0.827838000000 |
| H  | 3.148502000000  | 3.656793000000  | 0.723410000000  |
| C  | 1.378686000000  | 2.606725000000  | -2.099131000000 |
| H  | 1.299289000000  | 1.659240000000  | -2.639048000000 |
| H  | 1.767828000000  | 3.373725000000  | -2.775659000000 |
| H  | 0.362492000000  | 2.884932000000  | -1.801171000000 |
| Ge | 0.000082000000  | 0.000028000000  | -0.425525000000 |
| N  | 1.330177000000  | -0.684772000000 | 0.892609000000  |
| N  | 1.641629000000  | 1.501365000000  | 0.041538000000  |
| O  | 3.175465000000  | 0.731645000000  | 2.091414000000  |
| S  | 2.494307000000  | 0.416393000000  | 0.818904000000  |
| C  | -3.786083000000 | 0.214993000000  | -0.277676000000 |
| C  | -5.123078000000 | 0.058134000000  | 0.078941000000  |
| H  | -5.365151000000 | -0.422205000000 | 1.019811000000  |
| C  | -6.115654000000 | 0.534494000000  | -0.779194000000 |
| H  | -7.160800000000 | 0.420535000000  | -0.509597000000 |
| C  | -5.764376000000 | 1.157001000000  | -1.976609000000 |
| H  | -6.537893000000 | 1.527784000000  | -2.641865000000 |

|   |                |                |                |
|---|----------------|----------------|----------------|
| C | -4.41845000000 | 1.30920900000  | -2.32251200000 |
| H | -4.14697900000 | 1.79840700000  | -3.25258600000 |
| C | -3.42003900000 | 0.83892600000  | -1.47372700000 |
| H | -2.37245400000 | 0.96438900000  | -1.73524000000 |
| C | -1.47895000000 | 1.89765300000  | 1.71016300000  |
| H | -2.46985200000 | 1.85957300000  | 2.18029800000  |
| C | -0.42392300000 | 1.91544100000  | 2.81548800000  |
| H | -0.50710800000 | 1.01326000000  | 3.42466300000  |
| H | -0.56584800000 | 2.78582900000  | 3.46491500000  |
| H | 0.57979900000  | 1.96126800000  | 2.39168900000  |
| C | -1.40055400000 | 3.12766600000  | 0.80543100000  |
| H | -0.42385900000 | 3.15250400000  | 0.31890800000  |
| H | -1.52199600000 | 4.04914700000  | 1.38340700000  |
| H | -2.17814600000 | 3.09506700000  | 0.03694400000  |
| C | -2.27912700000 | -2.46614200000 | -0.86744900000 |
| H | -3.25104400000 | -2.08381900000 | -1.21194200000 |
| C | -2.51851500000 | -3.80215900000 | -0.15923900000 |
| H | -1.57118400000 | -4.23852600000 | 0.17103300000  |
| H | -3.01303400000 | -4.51533200000 | -0.82783000000 |
| H | -3.14741000000 | -3.65724700000 | 0.72358400000  |
| C | -1.37897800000 | -2.60607600000 | -2.09940900000 |
| H | -1.30004700000 | -1.65845500000 | -2.63915400000 |
| H | -1.76812700000 | -3.37305400000 | -2.77595900000 |
| H | -0.36259000000 | -2.88403700000 | -1.80187600000 |
| N | -1.33034700000 | 0.68529300000  | 0.89198400000  |
| N | -1.64156900000 | -1.50115600000 | 0.04154500000  |
| O | -3.17503900000 | -0.73127000000 | 2.09158900000  |
| S | -2.49424500000 | -0.41614900000 | 0.81885100000  |

#### Compound 4 (Hydrogen atoms are removed for clarity)

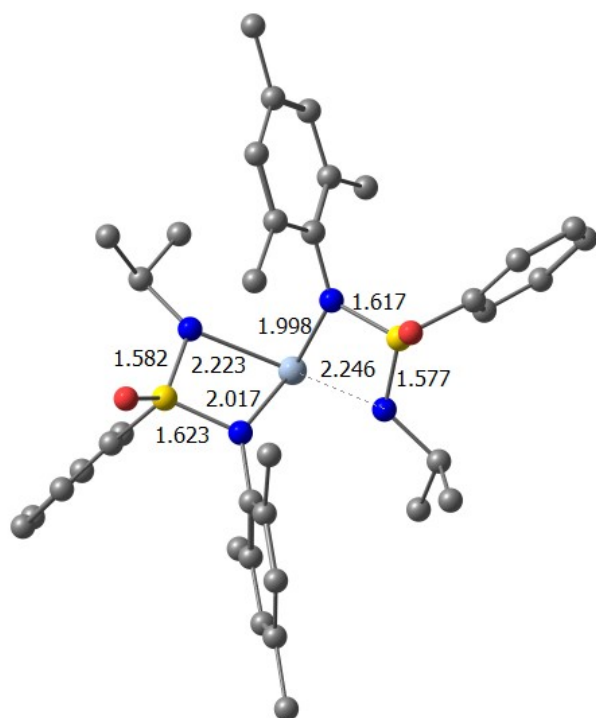

|   |                |                |                |
|---|----------------|----------------|----------------|
| C | 0.16148600000  | -3.45675700000 | -0.59398700000 |
| C | -0.23556700000 | -4.28757100000 | 0.62962800000  |
| C | -0.92554000000 | -3.46978900000 | -1.66891800000 |
| C | 3.13966400000  | -2.14474300000 | -0.57000300000 |

|    |                 |                 |                 |
|----|-----------------|-----------------|-----------------|
| C  | 2.949712000000  | -2.268388000000 | -1.948122000000 |
| C  | 4.029282000000  | -2.629267000000 | -2.749906000000 |
| C  | 5.284923000000  | -2.846256000000 | -2.176611000000 |
| C  | 5.462212000000  | -2.713054000000 | -0.798266000000 |
| C  | 4.383213000000  | -2.370034000000 | 0.016414000000  |
| C  | 2.477573000000  | 0.945839000000  | 0.634016000000  |
| C  | 3.430295000000  | 1.416167000000  | -0.291963000000 |
| C  | 4.346836000000  | 2.392499000000  | 0.118877000000  |
| C  | 4.350094000000  | 2.910580000000  | 1.411281000000  |
| C  | 3.385085000000  | 2.439328000000  | 2.306641000000  |
| C  | 2.445836000000  | 1.474108000000  | 1.944069000000  |
| C  | 3.506316000000  | 0.939439000000  | -1.722295000000 |
| C  | 5.361580000000  | 3.943939000000  | 1.839095000000  |
| C  | 1.394158000000  | 1.049071000000  | 2.929653000000  |
| C  | -0.157802000000 | 3.412095000000  | -0.569270000000 |
| C  | 0.274568000000  | 4.194675000000  | 0.674047000000  |
| C  | 0.903725000000  | 3.456713000000  | -1.668190000000 |
| C  | -3.142123000000 | 2.234272000000  | -0.507971000000 |
| C  | -3.019061000000 | 2.329702000000  | -1.896082000000 |
| C  | -4.092182000000 | 2.813553000000  | -2.638535000000 |
| C  | -5.277178000000 | 3.183106000000  | -1.995302000000 |
| C  | -5.387544000000 | 3.079444000000  | -0.608117000000 |
| C  | -4.311938000000 | 2.609534000000  | 0.146956000000  |
| C  | -2.540537000000 | -0.990161000000 | 0.522818000000  |
| C  | -3.560780000000 | -1.449008000000 | -0.334043000000 |
| C  | -4.432031000000 | -2.437591000000 | 0.132513000000  |
| C  | -4.317335000000 | -2.980623000000 | 1.414086000000  |
| C  | -3.279057000000 | -2.527609000000 | 2.231485000000  |
| C  | -2.379326000000 | -1.548651000000 | 1.805098000000  |
| C  | -3.717640000000 | -0.931382000000 | -1.742168000000 |
| C  | -5.289555000000 | -4.024563000000 | 1.903898000000  |
| C  | -1.233529000000 | -1.117443000000 | 2.672143000000  |
| N  | 0.409330000000  | -2.052052000000 | -0.235900000000 |
| N  | 1.503772000000  | -0.027788000000 | 0.259378000000  |
| N  | -1.617056000000 | -0.007852000000 | 0.067715000000  |
| N  | -0.416409000000 | 1.998812000000  | -0.256382000000 |
| O  | 2.114709000000  | -2.052614000000 | 1.830403000000  |
| O  | -2.057290000000 | 1.881628000000  | 1.847502000000  |
| S  | 1.760768000000  | -1.617694000000 | 0.463362000000  |
| S  | -1.764368000000 | 1.560463000000  | 0.435123000000  |
| Ge | 0.008178000000  | -0.041283000000 | -1.093770000000 |

## Compound 5

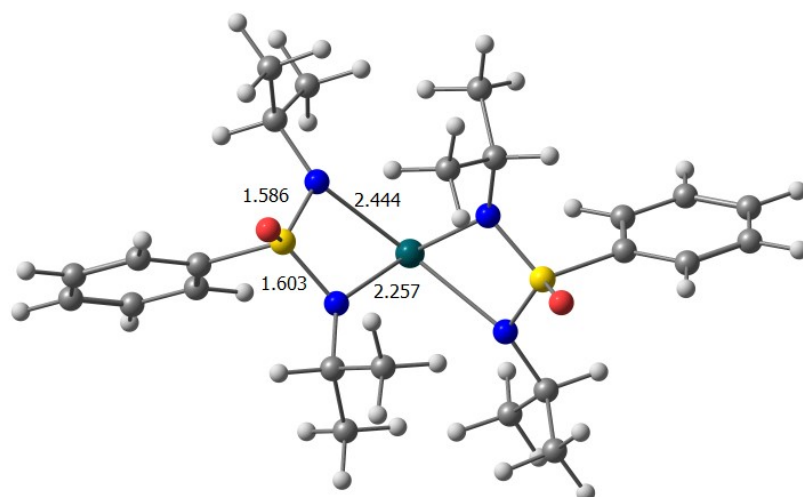

|   |                |                |                |
|---|----------------|----------------|----------------|
| C | -1.45836000000 | -2.07929700000 | 1.37068400000  |
| H | -2.48879200000 | -2.18104300000 | 1.73998200000  |
| C | -1.13531000000 | -3.32083500000 | 0.54257300000  |
| H | -1.84638600000 | -3.43306800000 | -0.28139200000 |
| H | -1.17457600000 | -4.22099500000 | 1.16395300000  |
| H | -0.12867900000 | -3.23643300000 | 0.12848800000  |
| C | -0.53254800000 | -1.91627900000 | 2.57746000000  |
| H | 0.50865800000  | -1.82538800000 | 2.26255900000  |
| H | -0.61868900000 | -2.78158300000 | 3.24450600000  |
| H | -0.80501800000 | -1.01889300000 | 3.13677000000  |
| C | -2.70408200000 | 2.48021600000  | -0.67108900000 |
| H | -3.70309100000 | 2.10615900000  | -0.94489900000 |
| C | -2.07545300000 | 3.06278800000  | -1.93694200000 |
| H | -1.06631800000 | 3.43601400000  | -1.73547000000 |
| H | -2.67608100000 | 3.89728400000  | -2.31105300000 |
| H | -2.00808100000 | 2.30399400000  | -2.72182100000 |
| C | -2.87915400000 | 3.53978700000  | 0.42364600000  |
| H | -3.32893000000 | 3.10246300000  | 1.31819500000  |
| H | -3.52113700000 | 4.35452800000  | 0.07099700000  |
| H | -1.91086300000 | 3.96068200000  | 0.70889200000  |
| C | -4.05321800000 | -0.30639700000 | 0.00406500000  |
| C | -4.04290800000 | -0.84486700000 | -1.28399400000 |
| H | -3.10542100000 | -0.93913400000 | -1.82244200000 |
| C | -5.24201500000 | -1.26313300000 | -1.85368400000 |
| H | -5.24680800000 | -1.68577500000 | -2.85343800000 |
| C | -6.43688600000 | -1.14122600000 | -1.13757300000 |
| H | -7.36977400000 | -1.47023700000 | -1.58470900000 |
| C | -6.43413100000 | -0.60108700000 | 0.14818400000  |
| H | -7.36248500000 | -0.50969400000 | 0.70309600000  |
| C | -5.23641100000 | -0.17724800000 | 0.72709000000  |
| H | -5.19970600000 | 0.24111700000  | 1.72607500000  |
| C | 2.70395300000  | -2.48009200000 | -0.67110800000 |
| H | 3.70297500000  | -2.10605500000 | -0.94489900000 |
| C | 2.07531400000  | -3.06262600000 | -1.93697700000 |
| H | 1.06607300000  | -3.43560900000 | -1.73557600000 |
| H | 2.67578300000  | -3.89729500000 | -2.31095600000 |
| H | 2.00819200000  | -2.30388700000 | -2.72192700000 |
| C | 2.87897800000  | -3.53965900000 | 0.42363400000  |
| H | 3.32880700000  | -3.10235300000 | 1.31816800000  |
| H | 3.52090000000  | -4.35444600000 | 0.07098000000  |
| H | 1.91066700000  | -3.96048100000 | 0.70891400000  |
| C | 1.45833300000  | 2.07947000000  | 1.37059700000  |
| H | 2.48877600000  | 2.18132900000  | 1.73983800000  |
| C | 0.53259800000  | 1.91629700000  | 2.57741100000  |
| H | -0.50856900000 | 1.82493900000  | 2.26252700000  |
| H | 0.61838500000  | 2.78176900000  | 3.24428700000  |
| H | 0.80542800000  | 1.01912800000  | 3.13689600000  |
| C | 1.13506900000  | 3.32099300000  | 0.54254700000  |
| H | 0.12837700000  | 3.23652600000  | 0.12862700000  |
| H | 1.84600600000  | 3.43326800000  | -0.28153200000 |
| H | 1.17439500000  | 4.22114500000  | 1.16393200000  |
| C | 4.05328200000  | 0.30635800000  | 0.00411300000  |
| C | 4.04303700000  | 0.84518200000  | -1.28380100000 |
| H | 3.10553200000  | 0.93991000000  | -1.82213200000 |
| C | 5.24222700000  | 1.26322700000  | -1.85347400000 |
| H | 5.24707100000  | 1.68615500000  | -2.85310600000 |
| C | 6.43712300000  | 1.14074100000  | -1.13749600000 |
| H | 7.37007500000  | 1.46958300000  | -1.58462200000 |
| C | 6.43430200000  | 0.60025100000  | 0.14810900000  |
| H | 7.36266900000  | 0.50840900000  | 0.70292400000  |
| C | 5.23649400000  | 0.17663700000  | 0.72700300000  |
| H | 5.19975000000  | -0.24196200000 | 1.72588900000  |
| N | -1.40771200000 | -0.90028400000 | 0.48174900000  |

|    |                 |                 |                 |
|----|-----------------|-----------------|-----------------|
| N  | -1.862175000000 | 1.358240000000  | -0.223285000000 |
| N  | 1.862106000000  | -1.358078000000 | -0.223297000000 |
| N  | 1.407785000000  | 0.900490000000  | 0.481609000000  |
| O  | -2.821888000000 | 0.577701000000  | 2.132530000000  |
| O  | 2.821769000000  | -0.577577000000 | 2.132533000000  |
| S  | -2.492798000000 | 0.254210000000  | 0.725059000000  |
| S  | 2.492771000000  | -0.254056000000 | 0.725047000000  |
| Sn | 0.000016000000  | -0.000026000000 | -1.035240000000 |

### Compound 6 (H atoms removed for clarity)

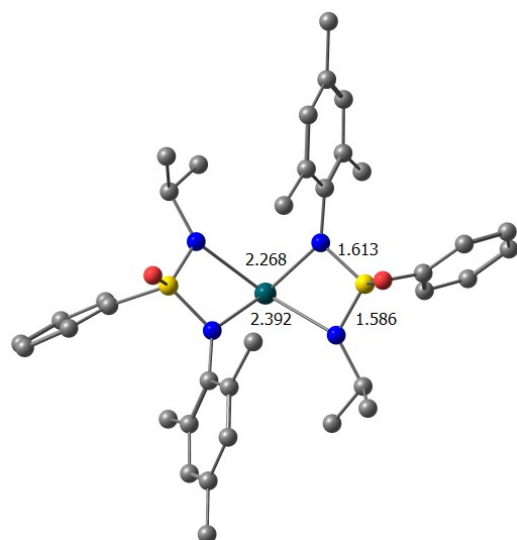

|   |                 |                 |                 |
|---|-----------------|-----------------|-----------------|
| C | 0.409087000000  | -3.488219000000 | -0.355639000000 |
| C | 0.033198000000  | -4.122270000000 | 0.987652000000  |
| C | -0.705801000000 | -3.667289000000 | -1.385902000000 |
| C | 3.417517000000  | -2.129495000000 | -0.445215000000 |
| C | 3.298678000000  | -2.387905000000 | -1.811560000000 |
| C | 4.429703000000  | -2.763691000000 | -2.531887000000 |
| C | 5.666852000000  | -2.861362000000 | -1.889684000000 |
| C | 5.772365000000  | -2.599788000000 | -0.522381000000 |
| C | 4.642179000000  | -2.238986000000 | 0.211204000000  |
| C | 2.684760000000  | 1.042216000000  | 0.573556000000  |
| C | 3.690110000000  | 1.538974000000  | -0.280042000000 |
| C | 4.508586000000  | 2.579539000000  | 0.174539000000  |
| C | 4.362673000000  | 3.131960000000  | 1.446005000000  |
| C | 3.349283000000  | 2.630284000000  | 2.268716000000  |
| C | 2.498794000000  | 1.603277000000  | 1.856603000000  |
| C | 3.910262000000  | 0.990540000000  | -1.667768000000 |
| C | 5.271203000000  | 4.235534000000  | 1.927276000000  |
| C | 1.383265000000  | 1.139605000000  | 2.752762000000  |
| C | -0.408941000000 | 3.487956000000  | -0.356653000000 |
| C | -0.032914000000 | 4.122386000000  | 0.986421000000  |
| C | 0.705841000000  | 3.666717000000  | -1.387092000000 |
| C | -3.417355000000 | 2.129326000000  | -0.445968000000 |
| C | -3.298369000000 | 2.387503000000  | -1.812341000000 |
| C | -4.429322000000 | 2.763123000000  | -2.532869000000 |
| C | -5.666549000000 | 2.860878000000  | -1.890830000000 |
| C | -5.772212000000 | 2.599548000000  | -0.523493000000 |
| C | -4.642103000000 | 2.238892000000  | 0.210282000000  |
| C | -2.684791000000 | -1.042086000000 | 0.573726000000  |
| C | -3.690413000000 | -1.538650000000 | -0.279715000000 |

|    |                 |                 |                 |
|----|-----------------|-----------------|-----------------|
| C  | -4.509012000000 | -2.579000000000 | 0.174997000000  |
| C  | -4.363016000000 | -3.131427000000 | 1.446504000000  |
| C  | -3.349392000000 | -2.629984000000 | 2.268998000000  |
| C  | -2.498753000000 | -1.603106000000 | 1.856729000000  |
| C  | -3.910596000000 | -0.990130000000 | -1.667403000000 |
| C  | -5.272232000000 | -4.234349000000 | 1.927982000000  |
| C  | -1.383026000000 | -1.139613000000 | 2.752732000000  |
| N  | 0.669288000000  | -2.042396000000 | -0.242995000000 |
| N  | 1.785015000000  | 0.040978000000  | 0.105926000000  |
| N  | -1.784990000000 | -0.041022000000 | 0.105866000000  |
| N  | -0.669165000000 | 2.042184000000  | -0.243568000000 |
| O  | 2.269947000000  | -1.845617000000 | 1.879829000000  |
| O  | -2.269937000000 | 1.846066000000  | 1.879243000000  |
| S  | 1.987911000000  | -1.518093000000 | 0.465489000000  |
| S  | -1.987826000000 | 1.518126000000  | 0.465020000000  |
| Sn | 0.000051000000  | -0.000214000000 | -1.293277000000 |
